# Supplementary material
Source: publisher figshare collection journal article supplement (https://acs.figshare.com/ndownloader/files/13153877)
Supplement: Supplementary file 1 [file 13153877]

## Supporting Information

### *A Synthetic and Computational Study of Tin-Free Reductive Tandem Cyclizations of Neutral Aminyl Radicals*

Hansamali S. Sirinimal,<sup>‡</sup> Sebastien P. Hebert,<sup>‡</sup> Ganesh Samala, Heng Chen, Gregory J. Rosenhauer, H. Bernard Schlegel,\* and Jennifer L. Stockdill\*

*Department of Chemistry, Wayne State University, 5101 Cass Avenue, Detroit, MI 48202, United States*

#### Table of Contents

|                                                     |     |
|-----------------------------------------------------|-----|
| General Information.....                            | S2  |
| Experimental Procedures and Spectroscopic Data..... | S3  |
| Spectra .....                                       | S17 |

**General Information.** Unless otherwise specified, all commercially available reagents were purchased from Sigma-Aldrich, Oakwood, or Alfa aesar and used without further purification. Grubbs' catalysts for all metathesis reactions were generously provided by Materia. Anhydrous PhMe, DMF, and CH<sub>2</sub>Cl<sub>2</sub> were purchased from Fisher, anhydrous THF was purchased from EMD. These were passed through a commercial solvent purification system (2 columns of alumina) and used without further drying. Triethylamine was distilled over CaH<sub>2</sub> immediately prior to use. Unless otherwise noted, all reactions were performed in flame-dried glassware under 1 atm of pre-purified anhydrous N<sub>2</sub> or argon gas at ambient temperature (24 ± 1 °C). <sup>1</sup>H NMR spectra and <sup>13</sup>C NMR spectra were recorded on a Varian Mercury-400 MHz or a Varian VNMRs-500MHz spectrometer with a multinuclear broadband probe at ambient temperature unless otherwise stated. Chemical shifts are reported in parts per million relative to residual solvent peaks (as established by Stoltz, et. al. in *Organometallics* **2010**, *29*, 2176). All <sup>13</sup>C spectra are recorded with complete proton decoupling. High-resolution mass spectral analyses were performed by the Lumigen Instrument Center, Wayne State University. All purifications were performed on SiliaFlash® P60 40-63µm (230-400 mesh) 60Å Irregular Silica Gels (cat. # R12030B) or on a Biotage Isolera IV flash purification system using SNAP cartridges (cat. # FSKO-1107-XXXX). Thin layer chromatography was performed using glass-backed SilicaPlate™ TLC Plates (cat. # TLG-R10011B-323) cut to the desired size then visualized with short-wave UV lamps and KMnO<sub>4</sub>, CAM, PMA, or Anisaldehyde stains prepared according to standard recipes. All yields refer to chromatographically and spectroscopically pure products. IR data was obtained on a Varian/Digilab Excalibur 3100 High Resolution FT-IR, and optical rotation data was collected on a Perkin-Elmer 341 automated Polarimeter at the concentration noted.

## Experimental Procedures and Spectroscopic Data

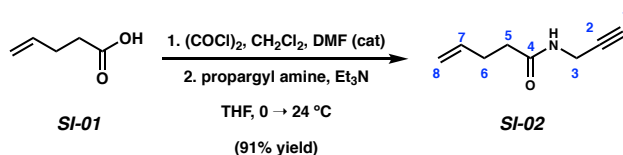

***N*-(prop-2-yn-1-yl)pent-4-enamide (SI-02).** To a cooled solution (0 °C) of 5-pentenoic acid (4.0 g, 39.95 mmol) in  $\text{CH}_2\text{Cl}_2$  (133 mL) was added  $(\text{COCl})_2$  (6.76 mL, 79.9 mmol) followed by DMF (2.9  $\mu\text{L}$ , 0.04 mmol). The reaction mixture was then warmed up to room temperature, and was stirred for 1 h. upon completion, the solvent was removed under reduced pressure and the product was obtained as colorless oil. To a cooled (0 °C) solution of the crude material (4.73 g, 39.95 mmol) in  $\text{CH}_2\text{Cl}_2$  (133 mL) was added propargyl amine (3.3 mL, 51.94 mmol) drop wise followed by  $\text{Et}_3\text{N}$  (7.2 mL, 51.94 mmol). The reaction was then brought to room temperature, and was stirred for 6 h. The reaction was quenched with water (50 mL) and the aqueous layer was extracted with  $\text{EtOAc}$  (3  $\times$  50 mL). The combined organic layer was dried with anhydrous  $\text{Na}_2\text{SO}_4$ . The solvent was removed under reduced pressure and the orange crude was purified by column chromatography eluted with 30%  $\text{EtOAc}$ /Hexanes. Product was isolated as a yellow solid (5.0 g, 91%)  $R_f=0.35$  (30%  $\text{EtOAc}$ /Hexanes).  $^1\text{H}$  NMR (400 MHz,  $\text{CDCl}_3$ )  $\delta$  5.98 (s, 1H, N), 5.80 (ddt,  $J = 16.8, 10.22, 6.46$  Hz, 1H, C<sub>7</sub>), 5.10 – 5.03 (m, 1H, C<sub>8</sub>), 5.02 – 4.96 (m, 1H, C<sub>8</sub>), 4.03, (dd,  $J = 5.24, 2.56$  Hz, 2H, C<sub>3</sub>), 2.42 – 2.36 (m, 2H, C<sub>5</sub>), 2.33 – 2.28 (m, 2H, C<sub>6</sub>), 2.21 (td,  $J = 2.56, 0.73$  Hz, 1H, C<sub>1</sub>);  $^{13}\text{C}$  NMR (101 MHz,  $\text{CDCl}_3$ )  $\delta$  172.02 (C<sub>4</sub>), 136.81 (C<sub>7</sub>), 115.73 (C<sub>8</sub>), 79.63 (C<sub>2</sub>), 71.51 (C<sub>1</sub>), 35.54 (C<sub>3</sub>), 29.43 (C<sub>5</sub>), 29.12 (C<sub>6</sub>). Spectral data matches the reported characterization data.<sup>1</sup>

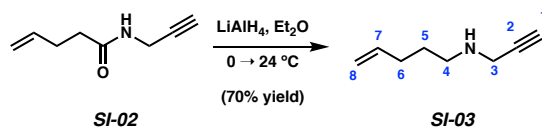

***N*-(prop-2-yn-1-yl)pent-4-en-1-amine (SI-03).** To a cooled (0 °C) suspension of  $\text{LiAlH}_4$  (2.0 g, 52.70 mmol) in  $\text{Et}_2\text{O}$  (50 mL) was added the amide (1.8 g, 13.13 mmol) in  $\text{Et}_2\text{O}$  (69 mL) under argon. The reaction was allowed to warm to room temperature and was run under argon for 12 h. Upon completion, the reaction was cooled to 0 °C and water (30 mL) was added carefully drop wise followed by aqueous solution of Rochelle (potassium sodium tartrate) salt (50 mL). The aqueous layer was extracted with  $\text{EtOAc}$  (3  $\times$  60 mL). The combined organic layer was dried with anhydrous  $\text{Na}_2\text{SO}_4$  and concentrated under reduced pressure. Crude product was purified by column chromatography (40%  $\text{EtOAc}$ /Hexane). Product was isolated as yellow oil (1.2 g, 70% yield).  $R_f = 0.5$  (5%  $\text{MeOH}/\text{CH}_2\text{Cl}_2$ ).  $^1\text{H}$  NMR (400 MHz,  $\text{CDCl}_3$ )  $\delta$  5.80 (ddt,  $J = 16.92, 10.16, 6.66$  Hz, 1H, C<sub>7</sub>), 5.01 (dq,  $J = 17.12, 1.54$  Hz, 1H, C<sub>8</sub>), 4.98 – 4.90 (m, 1H, C<sub>8</sub>), 3.40 (d,  $J = 2.41$  Hz, 2H, C<sub>3</sub>), 2.68 (t,  $J = 7.24$  Hz, 2H, C<sub>4</sub>), 2.19 (t,  $J = 2.42$  Hz, 1H, C<sub>1</sub>), 2.10 (q,  $J = 6.91$  Hz, 2H, C<sub>6</sub>), 1.57 (p,  $J = 7.36$  Hz, 2H, C<sub>5</sub>);  $^{13}\text{C}$  NMR (101 MHz,  $\text{CDCl}_3$ )  $\delta$  138.32 (C<sub>7</sub>),

<sup>1</sup> Poh, J.; Makai, S.; Keutz, T.; Tran, D. C.; Battilocchio, C.; Pasau, P.; Ley, A. V. Rapid Asymmetric Synthesis of Disubstituted Allenes by Coupling of Flow-Generated Diazo Compounds and Propargylated Amines. *Angew. Chem. Int. Ed.* **2017**, *56*, 1864–1868.

114.74 (C<sub>8</sub>), 82.33 (C<sub>2</sub>), 71.23 (C<sub>1</sub>), 48.12 (C<sub>3</sub>), 38.12 (C<sub>4</sub>), 31.41 (C<sub>6</sub>), 28.96 (C<sub>5</sub>). Spectral data matches the reported characterization data.<sup>2</sup>

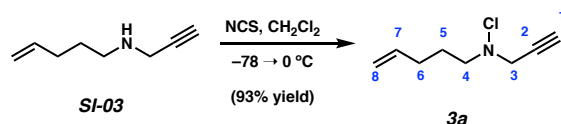

**N-chloro-N-(prop-2-yn-1-yl)pent-4-en-1-amine (3a).** To a cooled (−78 °C) solution of the amine (200 mg, 1.62 mmol) in CH<sub>2</sub>Cl<sub>2</sub> (10 mL) was added N-chlorosuccinamide (238.4 mg, 1.79 mmol). The reaction mixture was warmed up to 0 °C, over 2 hours. The reaction was diluted with hexanes (15 mL) and passed through a plug of silica (15 × 2.5 cm). Product was eluted with 5% Et<sub>2</sub>O/Hexanes as a colorless oil (239 mg, 93% yield). R<sub>f</sub>=0.5 (5% EtOAc/Hexane). <sup>1</sup>H NMR (400 MHz, CDCl<sub>3</sub>) δ 5.81 (ddt, J = 16.90, 10.21, 6.66 Hz, 1H, C<sub>7</sub>), 5.04 (dq, J = 17.13, 1.57 Hz, 1H, C<sub>8</sub>), 5.00 – 4.93 (m, 1H, C<sub>8</sub>), 3.82 (d, J = 2.38 Hz, 2H, C<sub>3</sub>), 3.00 (t, J = 7.8 Hz, 2H, C<sub>4</sub>), 2.41 (t, J = 2.38 Hz, 1H, C<sub>1</sub>), 2.13 (q, J = 6.84 Hz, 2H, C<sub>6</sub>), 1.74 (p, J = 7.36 Hz, 2H, C<sub>5</sub>); <sup>13</sup>C NMR (101 MHz, CDCl<sub>3</sub>) δ 137.83 (C<sub>7</sub>), 115.23 (C<sub>8</sub>), 77.62 (C<sub>2</sub>), 74.71 (C<sub>1</sub>), 61.32 (C<sub>3</sub>), 52.65 (C<sub>4</sub>), 30.73 (C<sub>6</sub>), 27.06 (C<sub>5</sub>); HRMS [M+H]<sup>+</sup> m/z ES calc'd for [C<sub>8</sub>H<sub>13</sub>NCl]<sup>+</sup>: 158.0731; observed: 158.0724; IR 3297, 2938.9, 2844, 1636, 1446, 1088, 985 cm<sup>−1</sup>.

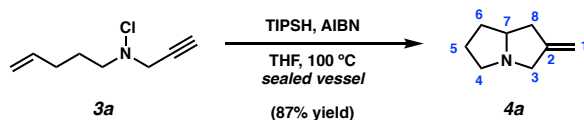

**2-methylenehexahydro-1H-pyrrolizine (4a).** To a flame dried microwave vessel under argon was added the chloroamine **3a** (35.0 mg, 0.22 mmol) and AIBN (7.3 mg, 0.044 mmol) in THF (20 mL). Then was added TIPSH (91.0 μL, 0.44 mmol) to the reaction solution. The microwave tube was sealed and, and the reaction tube was dipped in a hot oil bath (100 °C) and stirred for 3 h. **CAUTION:** REACTIONS UNDER PRESSURE SHOULD BE HANDLED IN A FUME HOOD BEHIND A BLAST SHIELD. Upon completion the reaction was brought to room temperature and the solvent was removed under reduced pressure and was purified by column chromatograph. Product was eluted with 10% (MeOH/CH<sub>2</sub>Cl<sub>2</sub>) and obtained as orange oil (23.5 mg, 87% yield). R<sub>f</sub>=0.3 (10% MeOH/CH<sub>2</sub>Cl<sub>2</sub>). <sup>1</sup>H NMR (400 MHz, CDCl<sub>3</sub>) δ 5.19 (d, J = 1.89 Hz, 2H, C<sub>1</sub>), 4.44 – 4.36 (m, 1H, C<sub>7</sub>), 4.22 (d, J = 14.76 Hz, 1H, C<sub>3</sub>), 3.82 (dt, J = 11.65, 5.90 Hz, 1H, C<sub>4</sub>), 3.48 (d, J = 14.76 Hz, 1H, C<sub>3</sub>), 2.98 – 2.91 (m, 1H, C<sub>4</sub>), 2.84 (dt, J = 11.52, 7.96 Hz, 1H, C<sub>8</sub>), 2.42 – 2.32 (m, 2H, C<sub>8</sub>, C<sub>6</sub>), 2.09 (tt, J = 8.00, 5.36 Hz, 2H, C<sub>5</sub>), 1.70 (dq, J = 13.24, 7.77 Hz, 1H, C<sub>6</sub>); <sup>13</sup>C NMR (101 MHz, CDCl<sub>3</sub>) δ 139.93 (C<sub>2</sub>), 112.62 (C<sub>1</sub>), 66.35 (C<sub>3</sub>), 57.42 (C<sub>4</sub>), 54.91 (C<sub>7</sub>), 36.52 (C<sub>8</sub>), 31.31 (C<sub>6</sub>), 25.02 (C<sub>5</sub>); HRMS [M+H]<sup>+</sup> m/z ES calc'd for [C<sub>8</sub>H<sub>14</sub>N]<sup>+</sup>: 124.1121; observed: 124.115; IR 3426, 3024, 2924, 1605, 1458, 1265, 1034, 735 cm<sup>−1</sup>.

**Reaction on 1 mmol scale:** To a 200 mL ChemGlass pressure vessel, heavy wall, round bottom (CG-1880-R-03) under argon was added the chloroamine **3a** (173.4 mg, 1.1 mmol) and AIBN (36.1 mg, 0.22 mmol) in THF (70 mL). Then was added TIPSH (0.45 mL, 2.2 mmol) to the reaction solution. The vessel was sealed and placed in a hot oil bath (100 °C) and stirred for 3

<sup>2</sup> Li, Y.; Marks, T. J. Organolanthanide-Catalyzed Intra- and Intermolecular Tandem C–N and C–C Bond-Forming Processes of Aminodialkenes, Aminodialkynes, Aminoalkenynes, and Aminoalkynes. New Regiospecific Approaches to Pyrrolizidine, Indolizidine, Pyrrole, and Pyrazine Skeletons. *J. Am. Chem. Soc.* **1998**, *120*, 1757–1771.

h. **CAUTION:** REACTIONS UNDER PRESSURE SHOULD BE HANDLED IN A FUME HOOD BEHIND A BLAST SHIELD. Upon completion, the reaction was brought to room temperature and the solvent was removed under reduced pressure and was purified by flash column chromatography. Product was eluted with 7% (MeOH/CH<sub>2</sub>Cl<sub>2</sub>) and obtained as orange oil (109.6 mg, 81% yield). Spectroscopic data were identical to the small-scale reaction above.

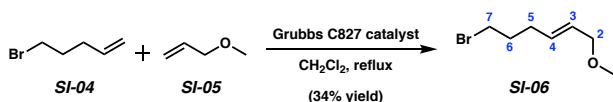

**(E)-6-bromo-1-methoxyhex-2-ene (SI-06).** To a solution of Grubbs' C827 catalyst (69 mg, 0.083 mmol) in CH<sub>2</sub>Cl<sub>2</sub> (40 mL) was added the 5-bromo-1-pentene (2.46 g, 16.64 mmol) and allylic ether (0.6 g, 8.32 mmol) under argon via syringe. The reaction was refluxed under argon at 40 °C for 20 h. The reaction was cooled to room temperature, and the solvent was removed under reduced pressure. Crude material was purified by column chromatography eluted with 0 – 5% Ether/Hexane to afford the product as a dark orange oil (0.55 g, 34% yield) *R*<sub>f</sub>=0.45 (10% EtOAc/Hexane). <sup>1</sup>H NMR (400 MHz, CDCl<sub>3</sub>) δ 5.70 – 5.58 (m, 2H, C<sub>4</sub>, C<sub>3</sub>), 3.86 (d, *J* = 4.83 Hz, 2H, C<sub>2</sub>), 3.40 (t, *J* = 6.7 Hz, 2H, C<sub>7</sub>), 3.32 (s, 3H, C<sub>1</sub>), 2.21 (q, *J* = 6.2, 5.7 Hz, 2H, C<sub>5</sub>), 1.95 (dq, *J* = 8.20, 6.7 Hz, 2H, C<sub>6</sub>); <sup>13</sup>C NMR (101 MHz, CDCl<sub>3</sub>) δ 132.11 (C<sub>4</sub>), 127.82 (C<sub>3</sub>), 73.01 (C<sub>2</sub>), 57.81 (C<sub>1</sub>), 33.14 (C<sub>7</sub>), 31.92 (C<sub>5</sub>), 30.63 (C<sub>6</sub>); IR 2930, 2848, 1442, 1239, 1123, 967 cm<sup>-1</sup>.

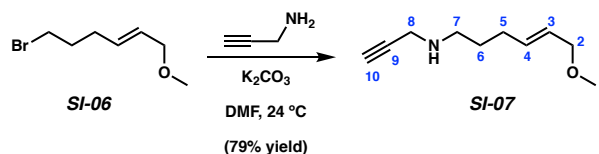

**(E)-6-methoxy-N(prop-2-yn-1-yl)hex-4-en-1-amine (SI-07).** To a dry round-bottom flask under an atmosphere of argon was added 10 mL DMF, propargyl amine (0.13 mL, 2.0 mmol) and K<sub>2</sub>CO<sub>3</sub> (0.276 g, 2.0 mmol). After few minutes was added **SI-06** (0.15 g, 1.0 mmol) and allowed stirred at room temperature for 4 h. The reaction mixture was diluted with H<sub>2</sub>O (10 mL) and extracted with EtOAc (3 × 20 mL). The combined organic layer was washed with brine solution and dried with anhydrous Na<sub>2</sub>SO<sub>4</sub>. Solvent was removed under reduced pressure and purified by column chromatography eluted with 0–3% MeOH/ CH<sub>2</sub>Cl<sub>2</sub> to afford product as a brown liquid (128 mg, 79% yield) *R*<sub>f</sub>=0.3 (3% MeOH/ CH<sub>2</sub>Cl<sub>2</sub>). <sup>1</sup>H NMR (400 MHz, CDCl<sub>3</sub>) δ 5.70 (dtt, *J* = 15.48, 6.5, 1.15 Hz, 1H, C<sub>4</sub>), 5.56 (dtt, *J* = 15.23, 6.09, 1.26 Hz 1H, C<sub>3</sub>), 3.85 (d, *J* = 6.1 Hz, 2H, C<sub>2</sub>), 3.41 (d, *J* = 2.4 Hz, 2H, C<sub>8</sub>), 3.30 (s, 3H, C<sub>1</sub>), 2.69 (t, *J* = 7.2 Hz, 2H, C<sub>7</sub>), 2.19 (dq, *J* = 2.52, 1.56, Hz, 1H, C<sub>10</sub>), 2.10 (q, *J* = 7.6 Hz, 2H, C<sub>5</sub>), 1.58 (p, *J* = 7.61 Hz, 2H, C<sub>6</sub>), 1.2 (s, 1H, N); <sup>13</sup>C NMR (101 MHz, CDCl<sub>3</sub>) δ 134.03 (C<sub>4</sub>), 126.63 (C<sub>3</sub>), 82.31 (C<sub>9</sub>), 73.12 (C<sub>2</sub>), 71.23 (C<sub>10</sub>), 57.73 (C<sub>1</sub>), 48.12 (C<sub>8</sub>), 38.16 (C<sub>7</sub>), 30.07 (C<sub>5</sub>), 29.23 (C<sub>6</sub>); HRMS [M+H<sup>+</sup>] *m/z* ES calc'd for [C<sub>10</sub>H<sub>17</sub>NO]<sup>+</sup>: 168.1383; observed: 168.1379; IR 3302, 3009, 2963, 2931, 2856, 2824, 1265, 1119, 1018, 972, 910 cm<sup>-1</sup>.

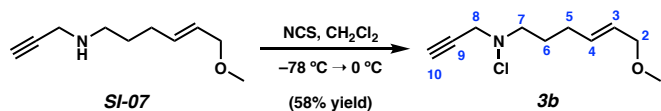

**(E)-N-chloro-6-methoxy-N-(prop-2-yn-1-yl)hex-4-en-1-amine (3b).** To a cooled ( $-78 ^\circ\text{C}$ ) solution of the amine (100 mg, 0.59 mmol) in  $\text{CH}_2\text{Cl}_2$  (6 mL) was added *N*-Chlorosuccinamide (87.8 mg, 0.66 mmol) and was warmed up to  $0 ^\circ\text{C}$  over 2 h. upon completion, the reaction was diluted with hexanes (5 mL) and purified by column chromatography. Product was eluted 7.5%  $\text{Et}_2\text{O}$ /Hexanes as a colorless oil (70 mg, 58% yield).  $R_f = 0.4$  (7.5%  $\text{Et}_2\text{O}$ /Hexane).  $^1\text{H}$  NMR (400 MHz,  $\text{CDCl}_3$ )  $\delta$  5.74 – 5.65 (m, 1H,  $\text{C}_4$ ), 5.59 – 5.54 (m, 1H,  $\text{C}_3$ ), 3.85 (dq,  $J = 5.85, 0.94$  Hz, 2H,  $\text{C}_2$ ), 3.80 (dd,  $J = 2.4, 0.55$  Hz, 2H,  $\text{C}_8$ ), 3.30 (s, 3H,  $\text{C}_1$ ), 2.98 (dd,  $J = 7.72, 6.27$  Hz, 2H,  $\text{C}_7$ ), 2.40 (t,  $J = 2.37$  Hz, 1H,  $\text{C}_{10}$ ), 2.15 – 2.09 (m, 2H,  $\text{C}_5$ ), 1.75 – 1.71 (m, 2H,  $\text{C}_6$ );  $^{13}\text{C}$  NMR (101 MHz,  $\text{CDCl}_3$ )  $\delta$  133.44 ( $\text{C}_4$ ), 127.06 ( $\text{C}_3$ ), 77.53 ( $\text{C}_9$ ), 74.72 ( $\text{C}_{10}$ ), 73.02 ( $\text{C}_2$ ), 61.33 ( $\text{C}_1$ ), 57.74 ( $\text{C}_8$ ), 52.62 ( $\text{C}_7$ ), 29.27 ( $\text{C}_5$ ), 27.25 ( $\text{C}_6$ ); HRMS  $[\text{M}+\text{H}^+]$   $m/z$  ES calc'd for  $[\text{C}_{10}\text{H}_{17}\text{NOCl}]^+$ : 202.0993; observed: 202.0991; IR 3297, 2921, 2848, 1442, 1386, 1114, 971, 661  $\text{cm}^{-1}$ .

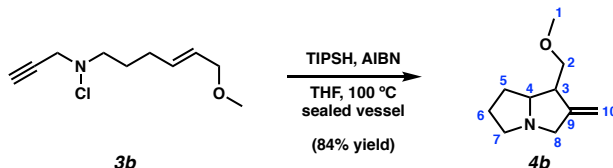

**1-(methoxymethyl)-2-methylenehexahydro-1H-pyrrolizine (4b).** To a flame dried microwave vessel under argon was added the chloroamine (60 mg, 0.30 mmol) and AIBN (9.8 mg, 0.06 mmol) in THF (25 mL). Then was added TIPSH (0.12 mL, 0.59) to the reaction solution. The microwave vessel was sealed and dipped in a hot oil bath ( $100 ^\circ\text{C}$ ) and stirred for 3 h. **CAUTION:** REACTIONS UNDER PRESSURE SHOULD BE HANDLED IN A FUME HOOD BEHIND A BLAST SHIELD. Solvent was removed under reduced pressure and was purified by column chromatography. Product was eluted with 10% ( $\text{MeOH}/\text{CH}_2\text{Cl}_2$ ) to obtain the product as orange oil (42.0 mg, 84% yield, dr  $\geq 19:1$ ).  $R_f = 0.4$  (10%  $\text{MeOH}/\text{CH}_2\text{Cl}_2$ ).  $^1\text{H}$  NMR (400 MHz,  $\text{CDCl}_3$ )  $\delta$  5.23 (dq,  $J = 12.13, 2.06$  Hz, 2H,  $\text{C}_{10}$ ), 4.35 (dd,  $J = 15.05, 2.1$  Hz, 1H,  $\text{C}_8$ ), 4.23 (q,  $J = 6.46$  Hz 1H,  $\text{C}_8$ ), 3.87 – 3.79 (m, 1H,  $\text{C}_7$ ), 3.54 – 3.46 (m, 2H,  $\text{C}_2$ ), 3.36 (d,  $J = 0.61$  Hz, 3H,  $\text{C}_1$ ), 3.30 (dt,  $J = 8.44, 5.16, 1.22$  Hz, 1H,  $\text{C}_7$ ), 2.86 (dt,  $J = 11.65, 7.81$  Hz, 1H,  $\text{C}_4$ ), 2.76 (dtd,  $J = 7.61, 5.61, 1.73$  Hz, 1H,  $\text{C}_3$ ), 2.38 (dtd,  $J = 13.28, 7.40, 5.67$  Hz, 1H,  $\text{C}_5$ ), 2.19 – 2.10 (m, 2H,  $\text{C}_6$ ), 1.86 (dq,  $J = 13.79$  Hz, 1, 7.24 Hz, 1H,  $\text{C}_5$ );  $^{13}\text{C}$  NMR (101 MHz,  $\text{CDCl}_3$ )  $\delta$  141.74 ( $\text{C}_9$ ), 112.72 ( $\text{C}_{10}$ ), 73.33 ( $\text{C}_1$ ), 70.03 ( $\text{C}_2$ ), 59.31 ( $\text{C}_4$ ), 57.42 ( $\text{C}_8$ ), 54.76 ( $\text{C}_7$ ), 48.74 ( $\text{C}_3$ ), 31.02 ( $\text{C}_5$ ), 24.81 ( $\text{C}_6$ ); HRMS  $[\text{M}+\text{H}^+]$   $m/z$  ES calc'd for  $[\text{C}_{10}\text{H}_{18}\text{NO}]^+$ : 168.1383; observed: 168.1379; IR 3102, 3040, 1589, 1450, 1435, 1265, 1196, 1119, 1088, 1072  $\text{cm}^{-1}$ .

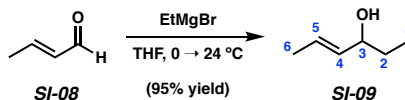

**(E)-hex-4-en-3-ol (SI-09).** To a cooled ( $0 ^\circ\text{C}$ ) solution of crotonaldehyde (1.0 g, 14.3 mmol) in THF (7 mL) was added ethyl magnesium bromide (1M in THF, 17.1 mL, 17.1 mmol) dropwise and was stirred for 15 minutes. The reaction was brought to  $0 ^\circ\text{C}$  and stirred for additional 1 h. The reaction was quenched with  $\text{NH}_4\text{Cl}$  (14 mL) and the aqueous layer was extracted with

EtOAc (3 × 20 mL). The combined organic layer was washed with brine (20 mL), dried over anhydrous Na<sub>2</sub>SO<sub>4</sub> and concentrated under reduced pressure. Crude product was purified by column chromatography (20% EtOAc/Hexane) to isolate the product as colorless oil (1.35 g, 95% yield). <sup>1</sup>H NMR (400 MHz, CDCl<sub>3</sub>) δ 5.62 (dq, *J* = 15.23, 6.40, 0.85 Hz, 1H, C<sub>5</sub>), 5.44 (ddq, *J* = 15.27, 7.16, 1.54 Hz, 1H, C<sub>4</sub>), 3.92 (q, *J* = 6.65 Hz, 1H, C<sub>3</sub>), 1.86 (bs, 1H, OH), 1.67 (ddd, *J* = 6.43, 1.49, 0.53 Hz, 3H, C<sub>6</sub>), 1.60 – 1.41 (m, 2H, C<sub>2</sub>), 0.86 (t, *J* = 7.46 Hz, 3H, C<sub>1</sub>); <sup>13</sup>C NMR (101 MHz, CDCl<sub>3</sub>) δ 134.02 (C<sub>5</sub>), 126.80 (C<sub>4</sub>), 74.43 (C<sub>3</sub>), 30.05 (C<sub>6</sub>), 17.63 (C<sub>2</sub>), 9.73 (C<sub>1</sub>). Data matched with the reported data.<sup>3</sup>

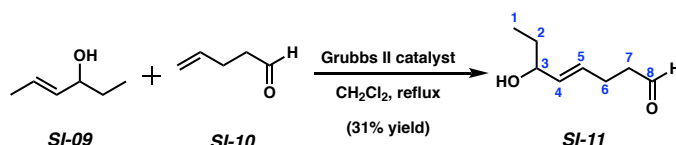

**(E)-6-hydroxyoct-4-enal (SI-11).** To a solution of 4-pentenal (0.62 g, 7.37 mmol) and Grubbs' 2<sup>nd</sup> generation catalyst (0.12 g, 0.15 mmol) in CH<sub>2</sub>Cl<sub>2</sub> (25.4 mL) was added the **SI-09** (1.10 g, 11.06 mmol) drop wise via a syringe pump. The reaction was refluxed at 40 °C for 18 h. Upon completion, the reaction was cooled to room temperature, and the solvent was removed under reduced pressure. Crude material was purified by column chromatography and the product was eluted with 30% EtOAc/Hexane as orange solid (322 mg, 31% yield). *R*<sub>f</sub> = 0.3 (30% EtOAc/Hexane). <sup>1</sup>H NMR (400 MHz, CDCl<sub>3</sub>) δ 9.77 (t, *J* = 1.39 Hz, 1H, C<sub>8</sub>), 5.65 (dt, *J* = 15.10, 6.38 Hz, 1H, C<sub>5</sub>), 5.53 (dd, *J* = 15.43, 6.38 Hz, 1H, C<sub>4</sub>), 3.97 (q, *J* = 6.52 Hz, 1H, C<sub>3</sub>), 2.56 – 2.52 (m, 2H, C<sub>7</sub>), 2.38 (q, *J* = 6.96 Hz, 2H, C<sub>6</sub>), 1.63 (s, 1H, OH), 1.52 (dtd, *J* = 17.12, 13.66, 6.38 Hz, 2H, C<sub>2</sub>), 0.89 (t, *J* = 7.45 Hz, 3H, C<sub>1</sub>); <sup>13</sup>C NMR (101 MHz, CDCl<sub>3</sub>) δ 201.80 (C<sub>8</sub>), 134.11 (C<sub>5</sub>), 129.36 (C<sub>4</sub>), 74.10 (C<sub>3</sub>), 43.11 (C<sub>6</sub>), 30.09 (C<sub>7</sub>), 24.67 (C<sub>2</sub>), 9.69 (C<sub>1</sub>). Characterization data matched with the reported data.<sup>4</sup>

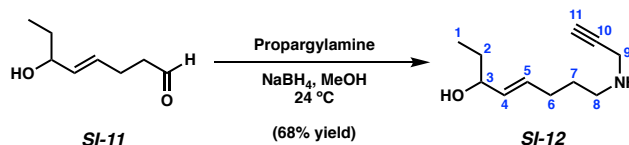

**(E)-8-(prop-2-yn-1-ylamino)oct-4-en-3-ol (SI-12).** To a solution of the **SI-11** (322 mg, 2.26 mmol) in MeOH (10 mL) was added propargylamine (0.16 mL, 2.49 mmol) and stirred for 3 h to form the aldimine. Then the reaction mixture was carefully treated with NaBH<sub>4</sub> (137.0 mg, 3.62 mmol) and the reaction was run for additional 2 h. Upon completion reaction was quenched with 1M NaOH (15mL) and the aqueous layer was extracted with EtOAc (3 × 15 mL). The combined organic layer was washed with brine solution (20 mL), and dried over anhydrous Na<sub>2</sub>SO<sub>4</sub>. The crude product was purified by column chromatography and eluted with 10% MeOH/ CH<sub>2</sub>Cl<sub>2</sub>. The product was obtained as yellow oil (280 mg, 68% yield). *R*<sub>f</sub> = 0.3 (30% EtOAc/Hexane). <sup>1</sup>H NMR (400 MHz, CDCl<sub>3</sub>) δ 5.66 – 5.60 (m, 1H, C<sub>4</sub>), 5.46 (ddt, *J* = 15.36, 6.99, 1.36 Hz, 1H, C<sub>5</sub>), 3.95 (q, *J* = 6.61 Hz, 1H, C<sub>3</sub>), 3.41 (d, *J* = 2.48 Hz, 2H, C<sub>9</sub>), 2.69 (t, *J* = 7.23 Hz, 2H, C<sub>8</sub>), 2.20 (t, *J* =

<sup>3</sup> Chen, M. Z.; Mclaughlin, M.; Takahashi, M.; Tarselli, M. A.; Yang, D.; Umemura, S.; Micalizio, G. C. Preparation of Stereodefined Homoallylic Amines from the Reductive Cross-Coupling of Allylic Alcohols with Imines. *J. Org. Chem.* **2010**, *75*, 8048–8059.

<sup>4</sup> Dérien, S.; Ropartz, L.; Le Paih, J.; Dixneul, P. H, Synthesis of 2-Alkoxy-5-methylenetetrahydropyrans: A Regioselective Ruthenium-Catalyzed C–C Coupling Reaction of Prop-2-yn-1-ols with Allyl Alcohol. *J. Org. Chem.* **1999**, *64*, 3524–3531.



2.38 Hz, 1H, C<sub>11</sub>), 2.07 (q,  $J$  = 5.61 Hz, 2H, C<sub>6</sub>), 1.65 (s, 1H, N), 1.53 (ddq,  $J$  = 14.18, 13.65, 7.12 Hz, 4H, C<sub>6</sub>, C<sub>7</sub>), 0.88 (t,  $J$  = 7.45 Hz, 3H, C<sub>1</sub>); <sup>13</sup>C NMR (101 MHz, CDCl<sub>3</sub>)  $\delta$  133.41 (C<sub>4</sub>), 131.32 (C<sub>5</sub>), 82.01 (C<sub>10</sub>), 74.31 (C<sub>3</sub>), 71.43 (C<sub>11</sub>), 48.04 (C<sub>9</sub>), 38.03 (C<sub>8</sub>), 30.12 (C<sub>6</sub>), 29.91 (C<sub>7</sub>), 29.11 (C<sub>2</sub>), 9.84 (C<sub>1</sub>); HRMS [M+H]<sup>+</sup>  $m/z$  ES calc'd for [C<sub>11</sub>H<sub>20</sub>NO]<sup>+</sup>: 182.1539; observed: 182.1534; IR 3302, 3009, 2963, 2932, 2839, 2250, 1597, 1504, 1481, 1265, 1119, 1003, 972 cm<sup>-1</sup>.

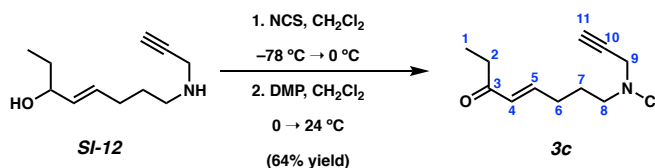

**(E)-8-(chloro(prop-2-yn-1-yl)amino)oct-4-en-3-one (3c).** To a cooled (-78 °C) solution of the amine (247 mg, 1.363 mmol) in CH<sub>2</sub>Cl<sub>2</sub> (15 mL) was added *N*-Chlorosuccinamide (200 mg, 1.5 mmol) and was warmed up to 0 °C over 2 h and run for an additional 1 h. Then to the reaction mixture at 0 °C was added DMP (867 mg, 2 mmol) and stirred for 18 h. upon completion, the reaction was purified by column chromatography. Product was eluted 20% Et<sub>2</sub>O/Hexanes as a colorless oil (187 mg, 64% yield).  $R_f$  = 0.6 (40% Et<sub>2</sub>O/ Hexane). <sup>1</sup>H NMR (400 MHz, CDCl<sub>3</sub>)  $\delta$  6.81 (dt,  $J$  = 15.99, 6.84 Hz, 1H, C<sub>5</sub>), 6.11 (d,  $J$  = 15.9, 1.6 Hz, 1H, C<sub>4</sub>), 3.80 (d,  $J$  = 2.4 Hz, 2H, C<sub>9</sub>), 2.98 (t,  $J$  = 6.8, Hz, 2H, C<sub>8</sub>), 2.54 (q,  $J$  = 7.3 Hz, 2H, C<sub>2</sub>), 2.4 (t,  $J$  = 2.4, 0.66 Hz, 1H, C<sub>11</sub>), 2.31 – 2.26 (m, 2H, C<sub>6</sub>), 1.81 (p,  $J$  = 7.3 Hz, 2H, C<sub>7</sub>), 1.07 (t,  $J$  = 7.3 Hz, 3H, C<sub>1</sub>); <sup>13</sup>C NMR (101 MHz, CDCl<sub>3</sub>)  $\delta$  201.01 (C<sub>3</sub>), 145.61 (C<sub>5</sub>), 130.52 (C<sub>4</sub>), 77.31 (C<sub>10</sub>), 74.94 (C<sub>11</sub>), 60.87 (C<sub>9</sub>), 52.72 (C<sub>8</sub>), 33.35 (C<sub>2</sub>), 29.34 (C<sub>6</sub>), 26.23 (C<sub>7</sub>), 8.08 (C<sub>1</sub>); HRMS [M+H]<sup>+</sup>  $m/z$  ES calc'd for [C<sub>11</sub>H<sub>17</sub>NOCl]<sup>+</sup>: 214.0993; observed: 214.0992; IR 3301, 2930, 2844, 1675, 1628, 1446, 1477, 1196, 1100, 968, 661 cm<sup>-1</sup>.

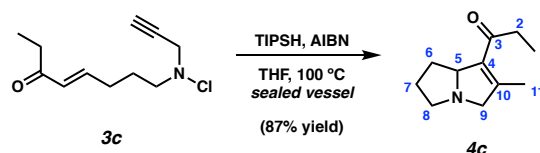

**1-(6-methyl-2,3,5,7a-tetrahydro-1H-pyrrolizin-7-yl)propan-1-one (4c).** To a flame dried microwave vessel under argon was added the chloroamine (22.0 mg, 0.103 mmol) and AIBN (3.40 mg, 0.021 mmol) in THF (11.4 mL). Then was added TIPSH (42.2  $\mu$ L, 0.206 mmol) to the reaction solution. The microwave tube was sealed and, and the reaction tube was dipped in a hot oil bath (100 °C) and stirred for 3 h. **CAUTION:** REACTIONS UNDER PRESSURE SHOULD BE HANDLED IN A FUME HOOD BEHIND A BLAST SHIELD. Upon completion solvent was removed under reduced pressure and was purified by column chromatography. Product was eluted with 10% (MeOH/ CH<sub>2</sub>Cl<sub>2</sub>) to obtain the product as orange oil (16 mg, 87% yield).  $R_f$ =0.25 (10% MeOH/CH<sub>2</sub>Cl<sub>2</sub>). <sup>1</sup>H NMR (400 MHz, CDCl<sub>3</sub>)  $\delta$  5.21 (t,  $J$  = 7.88 Hz, 1H, C<sub>5</sub>), 4.62 (d,  $J$  = 17.3 Hz, 1H, C<sub>9</sub>), 3.80 (dd,  $J$  = 11.6, 5.3 Hz, 2H, C<sub>9</sub>, C<sub>8</sub>), 2.98 – 2.92 (m, 1H, C<sub>8</sub>), 2.58 (qt,  $J$  = 7.1, 1.64 Hz, 2H, C<sub>2</sub>), 2.46 (m,  $J$  = 13.0, 6.0 Hz, 1H, C<sub>6</sub>), 2.12 – 2.00 (m, 5H, C<sub>11</sub>, C<sub>7</sub>), 1.80 (dq,  $J$  = 14.0, 7.4 Hz, 1H, C<sub>6</sub>), 1.07 (t,  $J$  = 8.69 Hz, 3H, C<sub>1</sub>); <sup>13</sup>C NMR (101 MHz, CDCl<sub>3</sub>)  $\delta$  196.66 (C<sub>3</sub>), 142.15 (C<sub>10</sub>), 133.59 (C<sub>4</sub>), 74.4 (C<sub>5</sub>), 64.6 (C<sub>9</sub>), 56.4 (C<sub>8</sub>), 36.0 (C<sub>2</sub>), 31.3 (C<sub>6</sub>), 25.1 (C<sub>11</sub>), 14.0 (C<sub>7</sub>), 7.3 (C<sub>1</sub>); HRMS [M+H]<sup>+</sup>  $m/z$  ES calc'd for [C<sub>11</sub>H<sub>18</sub>NO]<sup>+</sup>: 180.1383; observed: 180.1378; IR 3071, 3017, 1612, 1597, 1504, 1481, 1265, 1018 cm<sup>-1</sup>.



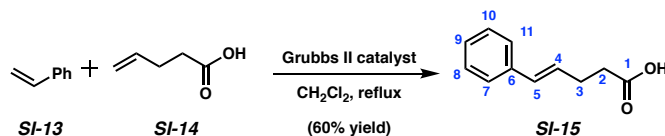

**(E)-5-phenylpent-4-enoic acid (SI-15).** 4-pentenoic acid (0.5 g, 4.99 mmol), and styrene (1.15 mL, 9.99 mmol) with Grubbs' 2<sup>nd</sup> generation catalyst (0.085 g, 0.10 mmol) in  $\text{CH}_2\text{Cl}_2$  was heated to reflux for 12 h. Upon completion the reaction mixture was cooled to room temperature and solvent was removed under reduced pressure. The dark green solid crude was dissolved in EtOAc (17 mL) and extracted with  $\text{NaHCO}_3$  (3  $\times$  34 mL). Combined aqueous layer was acidified to pH 1 with 10 % HCl and then extracted with EtOAc (2  $\times$  15 mL). The combined organic extract was washed with brine and dried over anhydrous  $\text{MgSO}_4$ . The solvent was removed under reduced pressure to give a pale yellow solid (0.53 g, 60% yield).  $^1\text{H}$  NMR and  $^{13}\text{C}$  NMR matched reported spectra.<sup>5</sup>

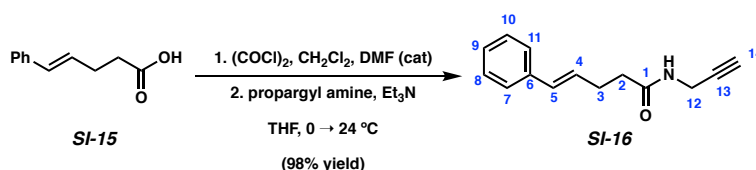

**(E)-5-phenyl-N-(prop-2-yn-1-yl)pent-4-enamide (SI-16).** To a cooled solution of the acid (0.53 g, 2.98 mmol) in  $\text{CH}_2\text{Cl}_2$  (20 mL) was added  $(\text{COCl})_2$  (0.51 mL, 5.97 mmol) followed by DMF (2.2  $\mu\text{L}$ , 0.03 mmol). The reaction mixture was then warmed up to room temperature and was stirred for 1 h. upon completion, the solvent was removed under reduced pressure and the product was obtained as green oil. To a cooled (0  $^\circ\text{C}$ ) solution of the crude material in THF (11 mL) was added propargyl amine (0.29 mL, 4.31 mmol) drop wise using a 500  $\mu\text{L}$  micro syringe followed by  $\text{Et}_3\text{N}$  (0.60 mL, 4.32 mmol). The reaction was stirred for 30 minutes, quenched with water and the aqueous layer was extracted with EtOAc (3  $\times$  10 mL). The combined organic layer was washed with brine and dried over anhydrous  $\text{MgSO}_4$ . The solvent was removed under reduced pressure and the crude material was purified by column chromatography (EtOAc/hexane, 20% to 80%) to give a yellow solid (0.69 g, 98% yield).  $^1\text{H}$  NMR (400 MHz,  $\text{CDCl}_3$ )  $\delta$  7.35 – 7.30 (m, 4H,  $\text{C}_7$ ,  $\text{C}_8$ ,  $\text{C}_{10}$ ,  $\text{C}_{11}$ ), 7.24 – 7.18 (m, 1H,  $\text{C}_9$ ), 6.44 (d,  $J$  = 15.83, 1 H,  $\text{C}_5$ ), 6.20 (dt,  $J$  = 15.80, 6.88 Hz, 1H,  $\text{C}_4$ ), 5.80 (s, 1H, N), 4.06 (dd,  $J$  = 5.24, 2.53 Hz, 2H,  $\text{C}_{12}$ ), 2.56 (q,  $J$  = 7.39 Hz, 2H,  $\text{C}_3$ ), 2.37 (t,  $J$  = 2.77 Hz, 2H,  $\text{C}_2$ ), 2.20 (s, 1H,  $\text{C}_{14}$ );  $^{13}\text{C}$  NMR (400 MHz,  $\text{CDCl}_3$ )  $\delta$  171.81 ( $\text{C}_1$ ), 137.32 ( $\text{C}_6$ ), 131.22 ( $\text{C}_7$ ,  $\text{C}_{11}$ ), 128.51 ( $\text{C}_5$ ), 127.23 ( $\text{C}_8$ ,  $\text{C}_{10}$ ), 126.11 ( $\text{C}_4$ ), 79.52 ( $\text{C}_{13}$ ), 71.65 ( $\text{C}_{14}$ ), 36.01 ( $\text{C}_{12}$ ), 29.22 ( $\text{C}_2$ ), 28.80 ( $\text{C}_3$ ); HRMS [ $\text{M}+\text{H}^+$ ]  $m/z$  ES calc'd for [ $\text{C}_{14}\text{H}_{16}\text{NO}$ ] $^+$ : 214.1226; observed: 214.1222; IR (neat) 3293, 3029, 2921, 1634, 1542, 966, 690  $\text{cm}^{-1}$ .

<sup>5</sup> Cottrell, I. F.; Cowley, A. R.; Croft, L. J.; Hymns, L.; Moloney, M. G.; Nettleton, E. J.; Kirsty Smithies, H.; Thompson, A. L. Acyloxylactonisations Mediated by Lead Tetracarboxylates. *Tetrahedron*. **2009**, 65, 2537–2550

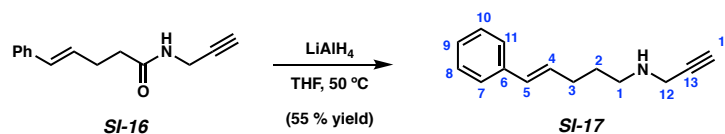

**(E)-5-phenyl-N-(prop-2-yn-1-yl)pent-4-en-1-amine (SI-17).** To a cooled (0 °C) suspension of the amide (0.3 g, 1.4 mmol) in THF (10 mL) was added LiAlH<sub>4</sub> (0.13 g, 3.5 mmol) and the reaction was heated to 50 °C and stirred for 12 h. Upon completion, the reaction was cooled to 0 °C and water (5 mL) was added drop wise followed by aqueous solution of Rochelle salt (15 mL). The reaction mixture was vigorously stirred at room temperature for 20 minutes. The aqueous layer was extracted with EtOAc (3 × 15 mL). The combined organic layer was washed with brine and dried with anhydrous MgSO<sub>4</sub> and concentrated under reduced pressure. Crude product was purified by column chromatography (EtOAc/hexane containing 1% triethylamine, 5% to 25%) to isolate the product as yellow oil (0.152 g, 55% yield). *R*<sub>f</sub>=0.5 (5% MeOH/CH<sub>2</sub>Cl<sub>2</sub>). <sup>1</sup>H NMR (400 MHz, CDCl<sub>3</sub>) δ 7.36 – 7.31 (m, 4H, C<sub>7</sub>, C<sub>8</sub>, C<sub>10</sub>, C<sub>11</sub>), 7.25 – 7.17 (m, 1H, C<sub>9</sub>), 6.41 (d, *J* = 15.82 Hz, 1 H, C<sub>5</sub>), 6.22 (dt, *J* = 15.84, 6.85 Hz, 1H, C<sub>4</sub>), 3.44 (d, *J* = 2.44 Hz, 2H, C<sub>12</sub>), 2.75 (t, *J* = 7.19 Hz, 2H, C<sub>1</sub>), 2.28 (q, *J* = 7.38 Hz, 2H, C<sub>3</sub>), 2.21 (t, *J* = 2.45 Hz, 1H, C<sub>14</sub>), 1.67 (p, *J* = 7.29 Hz, 2H, C<sub>2</sub>), 1.36 (s, 1H, N); <sup>13</sup>C NMR (400 MHz, CDCl<sub>3</sub>) δ 137.69 (C<sub>6</sub>), 130.21 (C<sub>5</sub>), 128.49 (C<sub>7</sub>, C<sub>11</sub>), 128.39 (C<sub>9</sub>), 126.90 (C<sub>4</sub>), 125.94 (C<sub>8</sub>, C<sub>10</sub>), 82.31 (C<sub>13</sub>), 71.24 (C<sub>14</sub>), 48.15 (C<sub>12</sub>), 38.17 (C<sub>1</sub>), 30.72 (C<sub>3</sub>), 29.46 (C<sub>2</sub>); HRMS [M+H]<sup>+</sup> *m/z* ES calc'd for [C<sub>14</sub>H<sub>18</sub>N]<sup>+</sup>: 200.1434; observed: 200.1429; IR (neat) 3306, 2931, 2851, 1449, 1125, 964, 741, 630 cm<sup>-1</sup>.

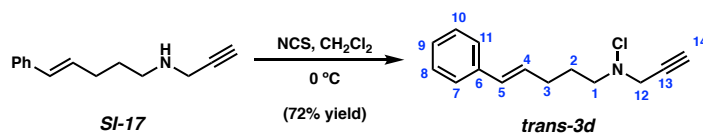

**(E)-N-chloro-5-phenyl-N-(prop-2-yn-1-yl)pent-4-en-1-amine (trans-3d).** To a solution of the amine (0.2 g, 1.00 mmol) in CH<sub>2</sub>Cl<sub>2</sub> (15 mL) at 0 °C under nitrogen was added *N*-chlorosuccinamide (0.15 g, 1.10 mmol) in portions over 5 minutes. The reaction mixture was stirred for 2 hours at the same temperature, and the solvent was evaporated under vacuum. The crude product was purified by column chromatography, product was eluted with 3-5% EtOAc/Hexanes as a colorless oil (0.15 g, 63% yield). *R*<sub>f</sub>=0.7 (10% EtOAc/Hexane). <sup>1</sup>H NMR (400 MHz, CDCl<sub>3</sub>) δ 7.40 – 7.25 (m, 4H, C<sub>7</sub>, C<sub>8</sub>, C<sub>10</sub>, C<sub>11</sub>), 7.20 (t, *J* = 7.1 Hz, 1H, C<sub>9</sub>), 6.42 (d, *J* = 15.8 Hz, 1H, C<sub>5</sub>), 6.21 (dt, *J* = 15.8, 6.9 Hz, 1H, C<sub>4</sub>), 3.84 (d, *J* = 2.3 Hz, 2H, C<sub>12</sub>), 3.05 (t, *J* = 8.0 Hz, 2H, C<sub>1</sub>), 2.41 (t, *J* = 2.3 Hz, 1H, C<sub>14</sub>), 2.30 (q, *J* = 7.3 Hz, 2H, C<sub>3</sub>), 1.83 (p, *J* = 7.2 Hz, 2H, C<sub>2</sub>); <sup>13</sup>C NMR (101 MHz, CDCl<sub>3</sub>) δ 137.57 (C<sub>6</sub>), 130.62 (C<sub>5</sub>), 129.67 (C<sub>4</sub>), 128.48 (C<sub>7</sub>, C<sub>11</sub>), 126.97 (C<sub>9</sub>), 125.95 (C<sub>8</sub>, C<sub>10</sub>), 77.49 (C<sub>13</sub>), 74.76 (C<sub>14</sub>), 61.25 (C<sub>12</sub>), 52.62 (C<sub>1</sub>), 29.93 (C<sub>3</sub>), 27.48 (C<sub>2</sub>); HRMS [M+H]<sup>+</sup> *m/z* ES calc'd for [C<sub>14</sub>H<sub>17</sub>NC]<sup>+</sup>: 234.1044; observed: 234.1046; IR (neat) 3297, 2926, 1606, 1498, 1446, 1252, 967, 691 cm<sup>-1</sup>.

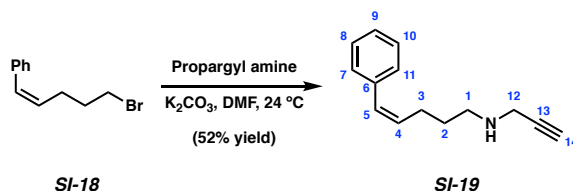

**(Z)-5-phenyl-N-(prop-2-yn-1-yl)pent-4-en-1-amine (SI-19).** To a solution of propargylamine (0.96 mL, 15.0 mmol) in DMF (20 mL) under nitrogen was added K<sub>2</sub>CO<sub>3</sub> (1.38 g, 10.0 mmol) followed by dropwise addition of **SI-18** (1.12 g, 5.0 mmol) in DMF (10 mL). The reaction mixture was stirred at room temperature for 6 h. Then the reaction was diluted with H<sub>2</sub>O (25 mL) and extracted with EtOAc (3 × 30 mL). The combined organic layer was washed with brine solution (2 × 25 mL). The separated organic layer was dried over anhydrous Na<sub>2</sub>SO<sub>4</sub>. Solvent was removed under reduced pressure and purified by flash chromatography, the product was eluted with 25–30% EtOAc/Hexanes as colorless liquid (0.42 g, 52% yield). R<sub>f</sub>=0.3 (20% EtOAc/Hexane). <sup>1</sup>H NMR (400 MHz, CDCl<sub>3</sub>) δ 7.36 – 7.14 (m, 5H, C<sub>7</sub>, C<sub>8</sub>, C<sub>9</sub>, C<sub>10</sub>, C<sub>11</sub>), 6.44 (d, *J* = 11.6 Hz, 1H, C<sub>5</sub>), 5.67 (dt, *J* = 11.6, 7.3 Hz, 1H, C<sub>4</sub>), 3.41 (d, *J* = 2.4 Hz, 2H, C<sub>12</sub>), 2.72 (t, *J* = 7.2 Hz, 2H, C<sub>1</sub>), 2.39 (qd, *J* = 7.5, 1.6 Hz, 2H, C<sub>3</sub>), 2.20 (t, *J* = 2.4 Hz, 1H, C<sub>14</sub>), 1.66 (p, *J* = 7.4 Hz, 2H, C<sub>2</sub>), 1.26 (t, *J* = 7.1 Hz, 1H, N); <sup>13</sup>C NMR (101 MHz, CDCl<sub>3</sub>) δ 137.55 (C<sub>6</sub>), 132.23 (C<sub>5</sub>), 129.28 (C<sub>9</sub>), 128.71 (C<sub>7</sub>, C<sub>11</sub>), 128.13 (C<sub>8</sub>, C<sub>10</sub>), 126.53 (C<sub>4</sub>), 82.25 (C<sub>13</sub>), 71.19 (C<sub>14</sub>), 48.20 (C<sub>12</sub>), 38.14 (C<sub>1</sub>), 30.07 (C<sub>3</sub>), 26.30 (C<sub>2</sub>); HRMS [M+H]<sup>+</sup> *m/z* ES calc'd for [C<sub>14</sub>H<sub>18</sub>N]<sup>+</sup>: 200.1434; observed: 200.1433; IR (neat) 3300, 2922, 1493, 1441, 1115, 917, 698 cm<sup>-1</sup>.

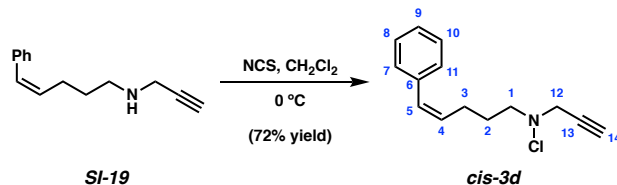

**(Z)-N-chloro-5-phenyl-N-(prop-2-yn-1-yl)pent-4-en-1-amine (cis-3d).** To a solution of the amine (0.2 g, 1.00 mmol) in CH<sub>2</sub>Cl<sub>2</sub> (15 mL) at 0 °C under nitrogen was added *N*-chlorosuccinamide (0.15 g, 1.10 mmol) in portions over 5 minutes. The reaction mixture was stirred for 2 hours at the same temperature, and the solvent was evaporated under vacuum. The crude product was purified by column chromatography, product was eluted with 3-5% EtOAc/Hexanes as a colorless oil (0.17 g, 72% yield). R<sub>f</sub>=0.7 (10% EtOAc/Hexane). <sup>1</sup>H NMR (400 MHz, CDCl<sub>3</sub>) δ 7.40 – 7.17 (m, 5H, C<sub>7</sub>, C<sub>8</sub>, C<sub>9</sub>, C<sub>10</sub>, C<sub>11</sub>), 6.46 (d, *J* = 11.7 Hz, 1H, C<sub>5</sub>), 5.66 (dt, *J* = 11.6, 7.3 Hz, 1H, C<sub>4</sub>), 3.80 (d, *J* = 2.4 Hz, 2H, C<sub>12</sub>), 3.01 (t, *J* = 8.0 Hz, 2H, C<sub>1</sub>), 2.47 – 2.35 (m, 3H, C<sub>3</sub>, C<sub>14</sub>), 1.80 (p, *J* = 7.4 Hz, 2H, C<sub>2</sub>); <sup>13</sup>C NMR (101 MHz, CDCl<sub>3</sub>) δ 137.45 (C<sub>6</sub>), 131.71 (C<sub>5</sub>), 129.64 (C<sub>9</sub>), 128.72 (C<sub>7</sub>, C<sub>11</sub>), 128.16 (C<sub>8</sub>, C<sub>10</sub>), 126.60 (C<sub>4</sub>), 77.44 (C<sub>13</sub>), 74.77 (C<sub>14</sub>), 61.42 (C<sub>12</sub>), 52.57 (C<sub>1</sub>), 28.14 (C<sub>3</sub>), 25.68 (C<sub>2</sub>); HRMS [M+H]<sup>+</sup> *m/z* ES calc'd for [C<sub>14</sub>H<sub>17</sub>NCl]<sup>+</sup>: 234.1044; observed: 234.1042; IR (neat) 3292, 2930, 2861, 1606, 1498, 1446, 1330, 1071, 959 cm<sup>-1</sup>.

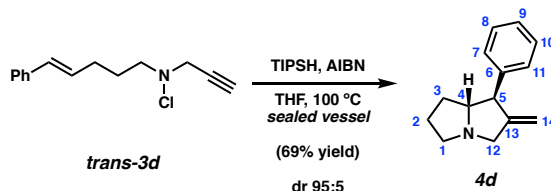

**2-methylene-1-phenylhexahydro-1H-pyrrolizine (4d).** To a flame dried microwave vessel under argon was added **trans-3d** (23.3 mg, 0.1 mmol) and AIBN (3.3 mg, 0.02 mmol) in THF (12 mL). Then was added TIPSH (41.2 μL, 0.2 mmol) to the reaction solution. The microwave vessel was sealed and, and the reaction tube was dipped in a hot oil bath (100 °C) and stirred for 2 h. **CAUTION:** REACTIONS UNDER PRESSURE SHOULD BE HANDLED IN A FUME

HOOD BEHIND A BLAST SHIELD. Upon completion solvent was removed under reduced pressure and was purified by column chromatograph. Product was eluted with 3-4% (MeOH/CH<sub>2</sub>Cl<sub>2</sub>) to obtain the product as colorless oil (13.8 mg, 69% yield, dr 95:5).  $R_f$ =0.35 (10% MeOH/CH<sub>2</sub>Cl<sub>2</sub>). <sup>1</sup>H NMR (400 MHz, CDCl<sub>3</sub>)  $\delta$  7.38 – 7.13 (m, 5H, C<sub>7</sub>, C<sub>8</sub>, C<sub>9</sub>, C<sub>10</sub>, C<sub>11</sub>), 5.01 (d,  $J$  = 2.3 Hz, 1H, C<sub>14</sub>), 4.60 (q,  $J$  = 2.2 Hz, 1H, C<sub>14</sub>), 3.92 (dd,  $J$  = 15.2, 1.7 Hz, 1H, C<sub>12</sub>), 3.60 – 3.53 (m, 1H, C<sub>4</sub>), 3.52 (d,  $J$  = 15.8 Hz, 1H, C<sub>12</sub>), 3.33 (d,  $J$  = 8.7 Hz, 1H, C<sub>5</sub>), 3.15 (tt,  $J$  = 7.6, 4.1 Hz, 1H, C<sub>1</sub>), 2.74 – 2.60 (m, 1H, C<sub>1</sub>), 2.07 – 1.82 (m, 3H, C<sub>2</sub>, C<sub>3</sub>), 1.72 (tt,  $J$  = 7.8, 4.1 Hz, 1H, C<sub>3</sub>); <sup>13</sup>C NMR (400 MHz, CDCl<sub>3</sub>)  $\delta$  154.90 (C<sub>6</sub>), 141.54 (C<sub>13</sub>), 128.66 (C<sub>8</sub>, C<sub>10</sub>), 128.50 (C<sub>7</sub>, C<sub>11</sub>), 126.53 (C<sub>9</sub>), 107.17 (C<sub>14</sub>), 73.71 (C<sub>4</sub>), 59.45 (C<sub>12</sub>), 55.97 (C<sub>5</sub>), 54.85 (C<sub>1</sub>), 29.74 (C<sub>3</sub>), 25.02 (C<sub>2</sub>); HRMS [M+H]<sup>+</sup>  $m/z$  ES calc'd for [C<sub>14</sub>H<sub>18</sub>N]<sup>+</sup>: 200.1434; observed: 200.1430; IR (neat) 3026, 2962, 1453, 1097, 890, 750, 696, 518 cm<sup>-1</sup>.

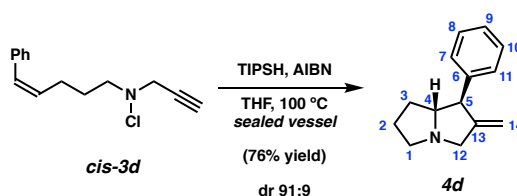

**2-methylene-1-phenylhexahydro-1H-pyrrolizine (4d).** To a flame dried microwave vessel under argon was added the **cis-3d** (46.6 mg, 0.2 mmol) and AIBN (6.6 mg, 0.04 mmol) in THF (16 mL). Then was added TIPSH (82.3  $\mu$ L, 0.4 mmol) to the reaction solution. The microwave vessel was sealed and, and the reaction tube was dipped in a hot oil bath (100 °C) and stirred for 2 h. **CAUTION:** REACTIONS UNDER PRESSURE SHOULD BE HANDLED IN A FUME HOOD BEHIND A BLAST SHIELD. Upon completion solvent was removed under reduced pressure and was purified by column chromatograph. Product was eluted with 3-4% (MeOH/CH<sub>2</sub>Cl<sub>2</sub>) to obtain the product as colorless oil (34.4 mg, 86% yield, dr 91:9). Experimental data matches with 4d obtained from *trans*-3d (*trans*-3d and *cis*-3d produced same diastereomer as major product).

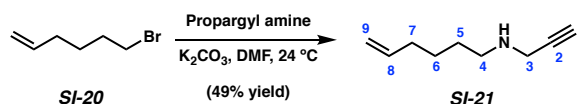

**N-(prop-2-yn-1-yl)hex-5-en-1-amine (SI-21).** To a solution of propargylamine (1.65 mL, 30.0 mmol) in DMF (30 mL) under nitrogen was added K<sub>2</sub>CO<sub>3</sub> (2.76 g, 20.0 mmol) followed by dropwise addition of **SI-20** (1.62 g, 10.0 mmol) in DMF (10 mL). The reaction mixture was stirred at room temperature for 6 h. Then the reaction was diluted with H<sub>2</sub>O (30 mL) and extracted with EtOAc (3  $\times$  40 mL). The combined organic layer was washed with brine solution (2  $\times$  25 mL). The separated organic layer was dried over anhydrous Na<sub>2</sub>SO<sub>4</sub>. Solvent was removed under reduced pressure and purified by flash chromatography, the product was eluted with 20–25% EtOAc/Hexanes as colorless liquid (0.66 g, 49% yield).  $R_f$ =0.3 (20% EtOAc/Hexane). <sup>1</sup>H NMR (400 MHz, CDCl<sub>3</sub>)  $\delta$  5.80 (ddt,  $J$  = 16.9, 10.2, 6.7 Hz, 1H, C<sub>8</sub>), 5.05 – 4.90 (m, 2H, C<sub>9</sub>), 3.42 (d,  $J$  = 2.4 Hz, 2H, C<sub>3</sub>), 2.69 (t,  $J$  = 6.9 Hz, 2H, C<sub>4</sub>), 2.20 (t,  $J$  = 2.4 Hz, 1H, C<sub>1</sub>), 2.07 (q,  $J$  = 7.0 Hz, 2H, C<sub>7</sub>), 1.55 – 1.40 (m, 4H, C<sub>5</sub>, C<sub>6</sub>); <sup>13</sup>C NMR (101 MHz, CDCl<sub>3</sub>)  $\delta$  138.67 (C<sub>8</sub>), 114.51 (C<sub>9</sub>), 82.33 (C<sub>2</sub>), 71.11 (C<sub>1</sub>), 48.48 (C<sub>3</sub>), 38.16 (C<sub>4</sub>), 33.57 (C<sub>7</sub>), 29.27 (C<sub>5</sub>), 26.53 (C<sub>6</sub>); HRMS [M+H]<sup>+</sup>  $m/z$  ES calc'd for [C<sub>9</sub>H<sub>16</sub>N]<sup>+</sup>: 138.1277; observed: 138.1272; IR (neat) 3303, 3076, 2928, 1640, 1117, 910, 631 cm<sup>-1</sup>.

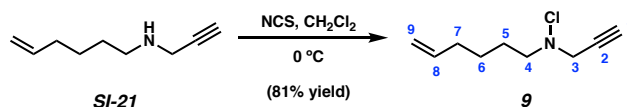

**N-chloro-N-(prop-2-yn-1-yl)hex-5-en-1-amine (9).** To a stirred solution of **SI-21** (0.41 g, 3.00 mmol) in  $\text{CH}_2\text{Cl}_2$  (20 mL) at 0 °C under nitrogen was added *N*-chlorosuccinimide (0.44 g, 3.30 mmol) in portions over 10 minutes. The reaction mixture was stirred at same temperature for 2 hours, and the solvent was evaporated under vacuum. The crude product was purified by column chromatography, product was eluted with 4-8% EtOAc/Hexanes as a colorless oil (0.41 g, 81% yield).  $R_f=0.8$  (10% EtOAc/Hexane).  $^1\text{H}$  NMR (400 MHz,  $\text{CDCl}_3$ )  $\delta$  5.83 – 5.79 (m, 1H, C<sub>8</sub>), 5.07 – 4.93 (m, 2H, C<sub>9</sub>), 3.81 (d,  $J = 2.4$  Hz, 2H, C<sub>3</sub>), 3.00 (t,  $J = 7.6$  Hz, 2H, C<sub>4</sub>), 2.41 (t,  $J = 2.4$  Hz, 1H, C<sub>1</sub>), 2.10 (q,  $J = 7.2$  Hz, 2H, C<sub>7</sub>), 1.68 – 1.60 (m, 2H, C<sub>5</sub>), 1.48 – 1.41 (m, 2H, C<sub>6</sub>);  $^{13}\text{C}$  NMR (101 MHz,  $\text{CDCl}_3$ )  $\delta$  138.43 (C<sub>8</sub>), 114.74 (C<sub>9</sub>), 77.52 (C<sub>2</sub>), 74.71 (C<sub>1</sub>), 61.80 (C<sub>3</sub>), 52.54 (C<sub>4</sub>), 33.41 (C<sub>7</sub>), 27.35 (C<sub>5</sub>), 25.91 (C<sub>6</sub>); HRMS  $[\text{M}+\text{H}]^+$   $m/z$  ES calc'd for  $[\text{C}_9\text{H}_{15}\text{NCl}]^+$ : 172.0880; observed: 172.0888; IR (neat) 3300, 2931, 2853, 1613, 1454, 917, 638  $\text{cm}^{-1}$ .

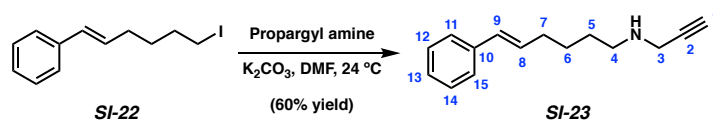

**(E)-6-phenyl-N-(prop-2-yn-1-yl)hex-5-en-1-amine (SI-23).** To a stirred solution of propargylamine (0.64 mL, 10.00 mmol) in DMF (20 mL) under nitrogen was added  $\text{K}_2\text{CO}_3$  (1.38 g, 10.0 mmol) followed by dropwise addition of **SI-22** (1.43 g, 5.00 mmol) in of DMF (10 mL). The reaction mixture was stirred at room temperature for 6 h. Then the reaction was diluted with  $\text{H}_2\text{O}$  (30 mL) and extracted with EtOAc (3  $\times$  25 mL). The combined organic layer was washed with Brine solution (2  $\times$  15 mL). The separated organic layer was dried with  $\text{Na}_2\text{SO}_4$ . Solvent was removed under reduced pressure and purified by column chromatography eluted with 10–15% EtOAc/Hexanes to afford product as light yellow liquid (0.64 g, 60% yield).  $R_f=0.3$  (20% EtOAc/Hexane).  $^1\text{H}$  NMR (400 MHz,  $\text{CDCl}_3$ )  $\delta$  7.31 (dt,  $J = 15.18, 7.5$  Hz, 4H, C<sub>11</sub>, C<sub>12</sub>, C<sub>14</sub>, C<sub>15</sub>), 7.19 (t,  $J = 7.14$  Hz 1H, C<sub>13</sub>), 6.39 (d,  $J = 15.84$  Hz, 1H, C<sub>9</sub>), 6.22 (dt,  $J = 15.79, 6.86$  Hz, 1H, C<sub>8</sub>), 3.43 (d,  $J = 2.38$  Hz, 2H, C<sub>3</sub>), 2.72 (t,  $J = 6.62$  Hz, 2H, C<sub>4</sub>), 2.26 – 2.20 (m, 3H, C<sub>7</sub>, C<sub>1</sub>), 1.58 – 1.52 (m, 4H, C<sub>5</sub>, C<sub>6</sub>), 1.31 (s, 1H, N);  $^{13}\text{C}$  NMR (101 MHz,  $\text{CDCl}_3$ )  $\delta$  137.77 (C<sub>10</sub>), 130.61 (C<sub>13</sub>), 130.05 (C<sub>9</sub>), 128.45 (C<sub>11</sub>, C<sub>15</sub>), 126.81 (C<sub>8</sub>), 125.90 (C<sub>12</sub>, C<sub>14</sub>), 82.32 (C<sub>2</sub>), 71.18 (C<sub>1</sub>), 48.49 (C<sub>3</sub>), 38.17 (C<sub>4</sub>), 32.82 (C<sub>7</sub>), 29.36 (C<sub>5</sub>), 26.99 (C<sub>6</sub>); HRMS  $[\text{M}+\text{H}]^+$   $m/z$  ES calc'd for  $[\text{C}_{15}\text{H}_{20}\text{N}]^+$ : 214.1591; observed: 214.1590; IR 3301, 2923, 2856, 1605, 1454, 1256, 962, 743  $\text{cm}^{-1}$ .

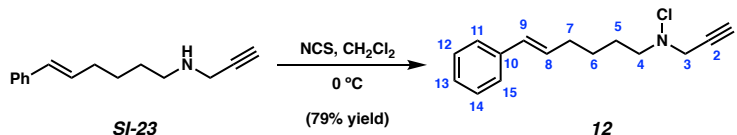

**(E)-N-chloro-6-phenyl-N-(prop-2-yn-1-yl)hex-5-en-1-amine (12).** To a stirred solution of **SI-23** (0.85 g, 4.00 mmol) in  $\text{CH}_2\text{Cl}_2$  (20 mL) at 0 °C under nitrogen was added *N*-chlorosuccinimide (0.53 g, 4.00 mmol) in portions over 10 minutes. The reaction mixture was stirred at same

temperature for 2 h, and the solvent was evaporated under vacuum. The crude product was purified by column chromatography, product was eluted with 3-5% EtOAc/Hexanes as a colorless oil (0.79 g, 80.7% yield).  $R_f=0.7$  (10% EtOAc/Hexane).  $^1\text{H}$  NMR (400 MHz,  $\text{CDCl}_3$ )  $\delta$  7.37 – 7.24 (m, 4H,  $\text{C}_{11}$ ,  $\text{C}_{12}$ ,  $\text{C}_{13}$ ,  $\text{C}_{14}$ ), 7.20 (t,  $J = 7.1$  Hz, 1H,  $\text{C}_{13}$ ), 6.40 (d,  $J = 15.9$  Hz, 1H,  $\text{C}_9$ ), 6.22 (td,  $J = 11.67$ , 7.28 Hz, 1H,  $\text{C}_8$ ), 3.83 (d,  $J = 2.3$  Hz, 2H,  $\text{C}_3$ ), 3.03 (t,  $J = 7.0$  Hz, 2H,  $\text{C}_4$ ), 2.41 (d,  $J = 2.3$  Hz, 1H,  $\text{C}_1$ ), 2.25 (q,  $J = 7.2$  Hz, 2H,  $\text{C}_7$ ), 1.70 (p,  $J = 7.2$  Hz, 2H,  $\text{C}_6$ ), 1.60 – 1.50 (m, 2H,  $\text{C}_5$ );  $^{13}\text{C}$  NMR (101 MHz,  $\text{CDCl}_3$ )  $\delta$  137.72 ( $\text{C}_{10}$ ), 130.35 ( $\text{C}_9$ ), 130.20 ( $\text{C}_{13}$ ), 128.47 ( $\text{C}_{11}$ ,  $\text{C}_{15}$ ), 126.86 ( $\text{C}_8$ ), 125.92 ( $\text{C}_{12}$ ,  $\text{C}_{14}$ ), 77.33 ( $\text{C}_2$ ), 74.73 ( $\text{C}_1$ ), 61.79 ( $\text{C}_3$ ), 52.52 ( $\text{C}_4$ ), 32.67 ( $\text{C}_7$ ), 27.38 ( $\text{C}_6$ ), 26.37 ( $\text{C}_5$ ); HRMS  $[\text{M}+\text{H}]^+$   $m/z$  ES calc'd for  $[\text{C}_{15}\text{H}_{19}\text{NCl}]^+$ : 248.1201; observed: 248.1200; IR 3292, 2938, 2857, 1601, 1446, 1256, 971, 635  $\text{cm}^{-1}$ .

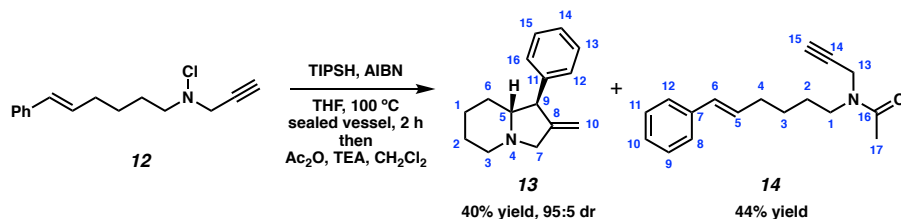

**2-methylene-1-phenyloctahydroindolizine (13).** To a flame dried microwave vessel under argon was added the chloroamine (61.8 mg, 0.25 mmol) and AIBN (8.2 mg, 0.05 mmol) in THF (18.0 mL). Then was added TIPSH (0.10 mL, 0.50 mmol) to the reaction solution. The vessel was sealed and was dipped in a hot oil bath (100 °C) and stirred for 2 h. **CAUTION:** REACTIONS UNDER PRESSURE SHOULD BE HANDLED IN A FUME HOOD BEHIND A BLAST SHIELD. The reaction mixture was evaporated and dissolved in  $\text{CH}_2\text{Cl}_2$  (8 mL) and was subjected to acetylation (for the ease of separation of reduced product and 13) (with 0.028 mL of  $\text{Ac}_2\text{O}$  and 0.08 mL of  $\text{Et}_3\text{N}$ , for about 0.5 h). The reaction mixture was evaporated, was added 10% HCl (4 mL). The aqueous layer was washed with  $\text{Et}_2\text{O}$  ( $3 \times 6$  mL), the separated aqueous layer was basified to pH  $\sim 9$  using 6N NaOH and the cyclized product was extracted with  $\text{CH}_2\text{Cl}_2$  ( $3 \times 8$  mL). Combined organic layer was dried over anhydrous  $\text{Na}_2\text{SO}_4$  and excess solvent was removed under reduced pressure. Crude product was purified by column chromatograph (basic alumina) (6-10% EtOAc/Hexanes to obtain as colorless oil (21.5 mg, 40% yield: dr 95:5).  $R_f = 0.35$  (10% MeOH/ $\text{CH}_2\text{Cl}_2$ ).  $^1\text{H}$  NMR (400 MHz,  $\text{CDCl}_3$ )  $\delta$  7.35 – 7.14 (m, 5H,  $\text{C}_{12}$ ,  $\text{C}_{13}$ ,  $\text{C}_{14}$ ,  $\text{C}_{15}$ ,  $\text{C}_{16}$ ), 5.03 (d,  $J = 4.0$  Hz, 1H,  $\text{C}_{10}$ ), 4.67 – 4.59 (m, 1H,  $\text{C}_{10}$ ), 3.81 (d,  $J = 13.4$  Hz, 1H,  $\text{C}_7$ ), 3.34 (dd,  $J = 10.3$ , 2.6 Hz, 1H,  $\text{C}_9$ ), 3.17 – 3.04 (m, 2H,  $\text{C}_7$ ,  $\text{C}_3$ ), 2.14 – 1.97 (m, 2H,  $\text{C}_3$ ,  $\text{C}_5$ ), 1.76 (td,  $J = 11.3$ , 3.6 Hz, 1H,  $\text{C}_6$ ), 1.70 – 1.58 (m, 2H,  $\text{C}_2$ ), 1.33 – 1.12 (m, 3H,  $\text{C}_6$ ,  $\text{C}_1$ );  $^{13}\text{C}$  NMR (101 MHz,  $\text{CDCl}_3$ )  $\delta$  151.25 ( $\text{C}_{11}$ ), 141.21 ( $\text{C}_8$ ), 129.14 ( $\text{C}_{12}$ ,  $\text{C}_{16}$ ), 128.24 ( $\text{C}_{13}$ ,  $\text{C}_{15}$ ), 126.48 ( $\text{C}_{14}$ ), 106.96 ( $\text{C}_{10}$ ), 72.40 ( $\text{C}_5$ ), 60.43 ( $\text{C}_7$ ), 56.91 ( $\text{C}_9$ ), 53.12 ( $\text{C}_3$ ), 29.31 ( $\text{C}_6$ ), 25.54 ( $\text{C}_1$ ), 24.05 ( $\text{C}_2$ ); HRMS  $[\text{M}+\text{H}]^+$   $m/z$  ES calc'd for  $[\text{C}_{15}\text{H}_{20}\text{N}]^+$ : 214.1590; observed: 214.1595; IR (neat) 2928, 1496, 1449, 1376, 1131, 750.

**(E)-N-(6-phenylhex-5-en-1-yl)-N-(prop-2-yn-1-yl)acetamide (14).** The combined  $\text{Et}_2\text{O}$  layer from above was dried over anhydrous  $\text{Na}_2\text{SO}_4$  and solvent was removed under reduced pressure. Crude product was purified by column chromatograph (10-15% EtOAc/Hexanes to obtain as colorless oil (28.1 mg, 44% yield; mixture of rotamers A & B).  $R_f = 0.50$  (40% EtOAc/Hexane).  $^1\text{H}$  NMR (400 MHz,  $\text{CDCl}_3$ ) 7.37 – 7.25 (m, 4H,  $\text{C}_8$ ,  $\text{C}_9$ ,  $\text{C}_{11}$ ,  $\text{C}_{12}$ ), 7.22 – 7.16 (m, 1H,  $\text{C}_{10}$ ), 6.39 (d,  $J = 15.8$  Hz, 1H,  $\text{C}_6$ ), 6.27 – 6.13 (m, 1H,  $\text{C}_5$ ), 4.20 (d,  $J = 2.4$  Hz, 1.26H,  $\text{C}_{13}$  of rotamer A), 3.99 (d,  $J = 2.3$  Hz, 0.81H,  $\text{C}_{13}$  of rotamer B), 3.44 (dt,  $J = 15.6$ , 7.5 Hz, 2H,  $\text{C}_1$ ), 2.31



– 2.20 (m, 2H, C<sub>4</sub>), 2.17 (d,  $J = 2.17$  Hz, 1.66H, C<sub>17</sub>, C<sub>15</sub> of rotamer A), 2.11 (s, 1.75H, C<sub>17</sub>, C<sub>15</sub> of rotamer B), 1.72 – 1.59 (m, 2H, C<sub>2</sub>), 1.57 – 1.40 (m, 2H, C<sub>3</sub>); <sup>13</sup>C NMR (101 MHz, CDCl<sub>3</sub>) (mixture of rotamers A, B)  $\delta$  170.2, 169.9 (C<sub>16</sub>), 137.60, 137.48 (C<sub>7</sub>), 130.60, 130.44 (C<sub>6</sub>), 130.15, 129.77 (C<sub>10</sub>), 128.52, 128.45 (C<sub>8</sub>, C<sub>12</sub>), 127.04, 126.83 (C<sub>5</sub>), 125.92 (C<sub>9</sub>, C<sub>11</sub>), 79.27, 78.72 (C<sub>14</sub>), 72.42, 71.49 (C<sub>15</sub>), 47.94, 45.98 (C<sub>13</sub>), 38.32, 34.07 (C<sub>1</sub>), 32.68, 32.58 (C<sub>4</sub>), 27.85, 27.06 (C<sub>17</sub>), 26.52, 26.43 (C<sub>3</sub>), 21.77, 21.37 (C<sub>2</sub>); HRMS [M+Na]<sup>+</sup>  $m/z$  ES calc'd for [C<sub>17</sub>H<sub>21</sub>NONa]<sup>+</sup>: 278.1515; observed: 278.1505; IR 3353, 3292, 2956, 2926, 1640, 1485, 1282, 967 cm<sup>-1</sup>.

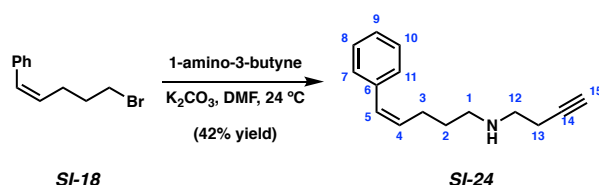

**(Z)-N-(but-3-yn-1-yl)-5-phenylpent-4-en-1-amine (SI-24).** To a solution of 1-amino-3-butyne (0.66 mL, 8.0 mmol) in DMF (20 mL) under nitrogen was added K<sub>2</sub>CO<sub>3</sub> (1.1 g, 8.0 mmol) followed by dropwise addition of **SI-18** (0.89 g, 4.0 mmol) in DMF (5 mL). The reaction mixture was stirred at room temperature for 6 h. Then the reaction was diluted with H<sub>2</sub>O (25 mL) and extracted with EtOAc (3 × 30 mL). The combined organic layer was washed with brine solution (2 × 25 mL). The separated organic layer was dried over anhydrous Na<sub>2</sub>SO<sub>4</sub>. Solvent was removed under reduced pressure and purified by flash chromatography, the product was eluted with 25–30% EtOAc/Hexanes as colorless liquid (0.34 g, 42% yield).  $R_f = 0.3$  (20% EtOAc/Hexane). <sup>1</sup>H NMR (400 MHz, CDCl<sub>3</sub>)  $\delta$  7.36 – 7.17 (m, 5H, C<sub>7</sub>, C<sub>8</sub>, C<sub>9</sub>, C<sub>10</sub>, C<sub>11</sub>), 6.43 (d,  $J = 11.6$  Hz, 1H, C<sub>5</sub>), 5.66 (dt,  $J = 11.6, 7.3$  Hz, 1H, C<sub>4</sub>), 2.75 (t,  $J = 6.6$  Hz, 2H, C<sub>1</sub>), 2.64 (t,  $J = 7.24$  Hz, 2H, C<sub>12</sub>), 2.43 – 2.31 (m, 4H, C<sub>3</sub>, C<sub>13</sub>), 2.01 – 1.92 (m, 1H, C<sub>15</sub>), 1.64 (q,  $J = 7.3$  Hz, 2H, C<sub>2</sub>), 1.34 (s, 1H, N); <sup>13</sup>C NMR (101 MHz, CDCl<sub>3</sub>)  $\delta$  137.56 (C<sub>6</sub>), 132.29 (C<sub>5</sub>), 129.25 (C<sub>9</sub>), 128.71 (C<sub>7</sub>, C<sub>11</sub>), 128.12 (C<sub>8</sub>, C<sub>10</sub>), 126.51 (C<sub>4</sub>), 82.49 (C<sub>14</sub>), 69.42 (C<sub>15</sub>), 48.83 (C<sub>12</sub>), 47.91 (C<sub>1</sub>), 30.25 (C<sub>13</sub>), 26.28 (C<sub>3</sub>), 19.55 (C<sub>2</sub>); HRMS [M+H]<sup>+</sup>  $m/z$  ES calc'd for [C<sub>15</sub>H<sub>20</sub>N]<sup>+</sup>: 214.1590; observed: 214.1584; IR (neat) 3305, 2930, 1498, 1450, 1127, 769, 700 cm<sup>-1</sup>.

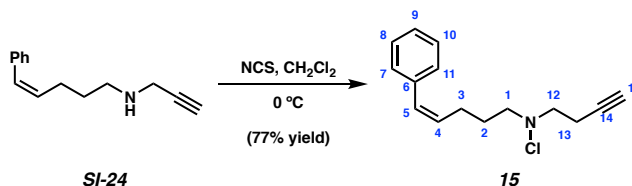

**(Z)-N-(but-3-yn-1-yl)-N-chloro-5-phenylpent-4-en-1-amine (15).** To a solution of the amine (0.21 g, 1.00 mmol) in CH<sub>2</sub>Cl<sub>2</sub> (15 mL) at 0 °C under nitrogen was added *N*-chlorosuccinamide (0.15 g, 1.10 mmol) in portions over 5 minutes. The reaction mixture was stirred for 2 hours at the same temperature, and the solvent was evaporated under vacuum. The crude product was purified by column chromatography, product was eluted with 3–5% EtOAc/Hexanes as a colorless oil (0.19 g, 77% yield).  $R_f = 0.8$  (10% EtOAc/Hexane). <sup>1</sup>H NMR (400 MHz, CDCl<sub>3</sub>)  $\delta$  7.39 – 7.13 (m, 5H, C<sub>7</sub>, C<sub>8</sub>, C<sub>9</sub>, C<sub>10</sub>, C<sub>11</sub>), 6.45 (d,  $J = 11.6$  Hz, 1H, C<sub>5</sub>), 5.65 (dt,  $J = 11.7, 7.3$  Hz, 1H, C<sub>4</sub>), 3.08 (t,  $J = 7.3$  Hz, 2H, C<sub>12</sub>), 2.97 (t,  $J = 8.0$  Hz, 2H, C<sub>1</sub>), 2.56 (td,  $J = 7.3, 2.6$  Hz, 2H, C<sub>3</sub>), 2.40 (qd,  $J = 7.5, 1.7$  Hz, 2H, C<sub>13</sub>), 1.97 (t,  $J = 2.6$  Hz, 1H, C<sub>15</sub>), 1.83 (p,  $J = 7.4$  Hz, 2H, C<sub>2</sub>); <sup>13</sup>C NMR (101 MHz, CDCl<sub>3</sub>)  $\delta$  137.46 (C<sub>6</sub>), 131.78 (C<sub>5</sub>), 129.63 (C<sub>9</sub>), 128.71 (C<sub>7</sub>, C<sub>11</sub>), 128.15 (C<sub>8</sub>, C<sub>10</sub>), 126.58 (C<sub>4</sub>), 81.40 (C<sub>14</sub>), 69.43 (C<sub>15</sub>), 63.53 (C<sub>12</sub>), 62.35 (C<sub>1</sub>), 27.97



(C<sub>3</sub>), 25.64 (C<sub>13</sub>), 17.80 (C<sub>2</sub>); HRMS [M+H]<sup>+</sup> m/z ES calc'd for [C<sub>15</sub>H<sub>19</sub>NCl]<sup>+</sup>: 248.1201; observed: 248.1199; IR (neat) 3300, 2935, 2836, 1493, 1445, 1106, 763, 703 cm<sup>-1</sup>.

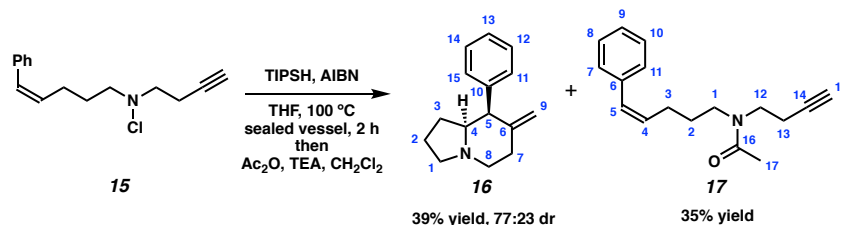

**7-methylene-8-phenyloctahydroindolizine (16).** To a flame dried microwave vessel under argon was added the chloramine **15** (99.1 mg, 0.40 mmol) and AIBN (13.14 mg, 0.08 mmol) in THF (22 mL). Then was added TIPSH (0.16 mL, 0.80 mmol) to the reaction solution. The vessel was sealed and was dipped in a hot oil bath (100 °C) and stirred for 2 h. **CAUTION:** REACTIONS UNDER PRESSURE SHOULD BE HANDLED IN A FUME HOOD BEHIND A BLAST SHIELD. The reaction mixture was evaporated and dissolved in CH<sub>2</sub>Cl<sub>2</sub> (10 mL) and was subjected to acetylation (for the ease of separation of reduced product and **16**) (with 0.045 mL of Ac<sub>2</sub>O and 0.11 mL of Et<sub>3</sub>N, for about 0.5 h). The reaction mixture was evaporated, was added 10% HCl (4 mL). The aqueous layer was washed with Et<sub>2</sub>O (3 × 8 mL), the separated aqueous layer was basified to pH ~ 9 using 6N NaOH and the cyclized product was extracted with CH<sub>2</sub>Cl<sub>2</sub> (3 × 10 mL). Combined organic layer was dried over anhydrous Na<sub>2</sub>SO<sub>4</sub> and excess solvent was removed under reduced pressure. Crude product was purified by column chromatograph (basic alumina) (6-9% EtOAc/Hexanes to obtain as colorless oil (33.3 mg, 39% yield; dr 77:23). R<sub>f</sub> = 0.30 (5% MeOH/CH<sub>2</sub>Cl<sub>2</sub>). <sup>1</sup>H NMR (400 MHz, CDCl<sub>3</sub>) δ 7.36 – 7.10 (m, 5H, C<sub>11</sub>, C<sub>12</sub>, C<sub>13</sub>, C<sub>14</sub>, C<sub>15</sub>), 4.79 (d, *J* = 1.8 Hz, 1H, C<sub>9</sub>), 4.13 (d, *J* = 1.7 Hz, 1H, C<sub>9</sub>), 3.22 (ddd, *J* = 10.5, 5.2, 1.8 Hz, 1H, C<sub>1</sub>), 3.19 – 3.08 (m, 2H, C<sub>5</sub>, C<sub>1</sub>), 2.64 – 2.51 (m, 1H, C<sub>7</sub>), 2.41 (dt, *J* = 13.7, 2.4 Hz, 1H, C<sub>7</sub>), 2.27 – 2.13 (m, 3H, C<sub>8</sub>, C<sub>4</sub>), 1.88 – 1.74 (m, 1H, C<sub>3</sub>), 1.68 – 1.52 (m, 2H, C<sub>3</sub>, C<sub>2</sub>), 1.40 – 1.27 (m, 1H, C<sub>2</sub>); <sup>13</sup>C NMR (101 MHz, CDCl<sub>3</sub>) δ 149.71 (C<sub>10</sub>), 140.12 (C<sub>6</sub>), 129.26 (C<sub>12</sub>, C<sub>14</sub>), 128.12 (C<sub>11</sub>, C<sub>15</sub>), 126.46 (C<sub>13</sub>), 110.04 (C<sub>9</sub>), 69.06 (C<sub>4</sub>), 55.42 (C<sub>5</sub>), 54.20 (C<sub>1</sub>), 53.00 (C<sub>8</sub>), 35.30 (C<sub>7</sub>), 29.87 (C<sub>2</sub>), 24.05 (C<sub>3</sub>); HRMS [M+H]<sup>+</sup> m/z ES calc'd for [C<sub>15</sub>H<sub>20</sub>N]<sup>+</sup>: 214.1590; observed: 214.1585; IR (neat) 3305, 2921, 1498, 1450, 1105, 773, 635.

**(Z)-N-(but-3-yn-1-yl)-N-(5-phenylpent-4-en-1-yl)acetamide (17).** The combined Et<sub>2</sub>O layer from above was dried over anhydrous Na<sub>2</sub>SO<sub>4</sub> and solvent was removed under reduced pressure. Crude product was purified by column chromatograph (12-15% EtOAc/Hexanes to obtain as colorless oil (35.7 mg, 35% yield; mixture of rotamers A & B). R<sub>f</sub> = 0.50 (40% EtOAc/Hexane). <sup>1</sup>H NMR (400 MHz, CDCl<sub>3</sub>) 7.35 – 7.15 (m, 5H, C<sub>7</sub>, C<sub>8</sub>, C<sub>9</sub>, C<sub>10</sub>, C<sub>11</sub>), 6.48 (d, *J* = 11.6 Hz, 0.57H, C<sub>5</sub> of rotamer A), 6.43 (d, *J* = 11.6 Hz, 0.41H, C<sub>5</sub> of rotamer B), 5.70 – 5.55 (m, 1H, C<sub>4</sub>), 3.40 (dt, *J* = 14.2, 7.0 Hz, 2H, C<sub>12</sub>), 3.36 – 3.26 (m, 2H, C<sub>1</sub>), 2.49 – 2.27 (m, 4H, C<sub>3</sub>, C<sub>13</sub>), 2.11 (s, 1.23H, C<sub>17</sub> of rotamer B), 2.04 (s, 1.86H, C<sub>17</sub> of rotamer A), 2.01 (t, *J* = 2.54 Hz, 0.36H, C<sub>15</sub> of rotamer B), 1.94 (d, *J* = 2.58 Hz, 0.51H, C<sub>15</sub> of rotamer A), 1.77 – 1.63 (m, 2H, C<sub>2</sub>); <sup>13</sup>C NMR (101 MHz, CDCl<sub>3</sub>) (mixture of rotamers A, B) δ 170.35 (C<sub>16</sub>), 137.43, 137.17 (C<sub>6</sub>), 131.74, 130.82 (C<sub>5</sub>), 130.25, 129.52 (C<sub>9</sub>), 128.70, 128.64 (C<sub>7</sub>, C<sub>11</sub>), 128.24, 128.14 (C<sub>8</sub>, C<sub>10</sub>), 126.83, 126.58 (C<sub>4</sub>), 82.05, 80.42 (C<sub>14</sub>), 70.84, 69.56 (C<sub>15</sub>), 49.30, 47.25 (C<sub>12</sub>), 45.30, 45.07 (C<sub>1</sub>), 29.07, 27.82 (C<sub>17</sub>), 25.97, 25.65 (C<sub>3</sub>), 21.70, 21.42 (C<sub>13</sub>), 18.82, 17.64 (C<sub>2</sub>); HRMS [M+Na]<sup>+</sup> m/z ES calc'd for [C<sub>17</sub>H<sub>22</sub>NO]<sup>+</sup>: 256.1696; observed: 256.1697; IR 3342, 2945, 2910, 1636, 1456, 1145, 958 cm<sup>-1</sup>.

<sup>1</sup>H, <sup>13</sup>C NMR Spectra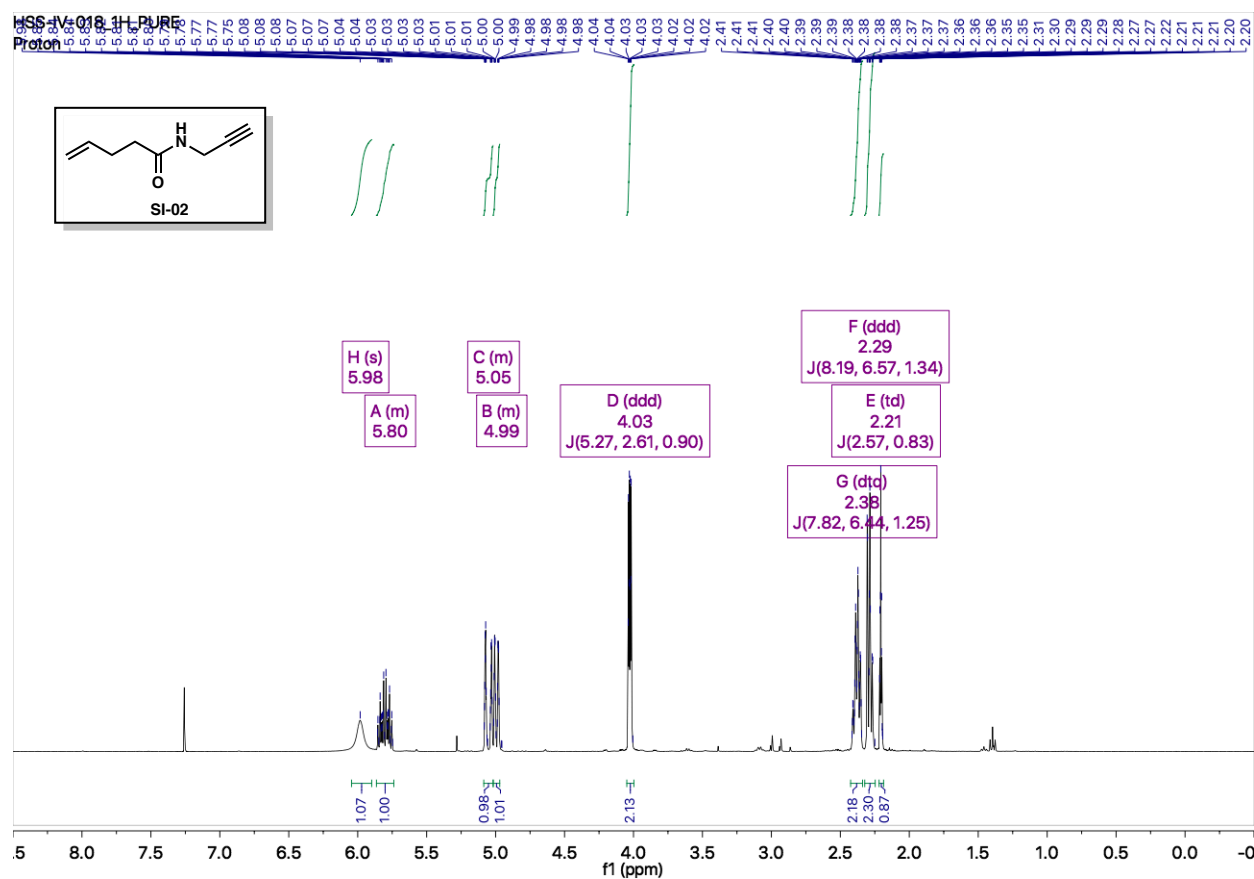

HSS-IV-018\_13C\_PURE  
C13-STANDARD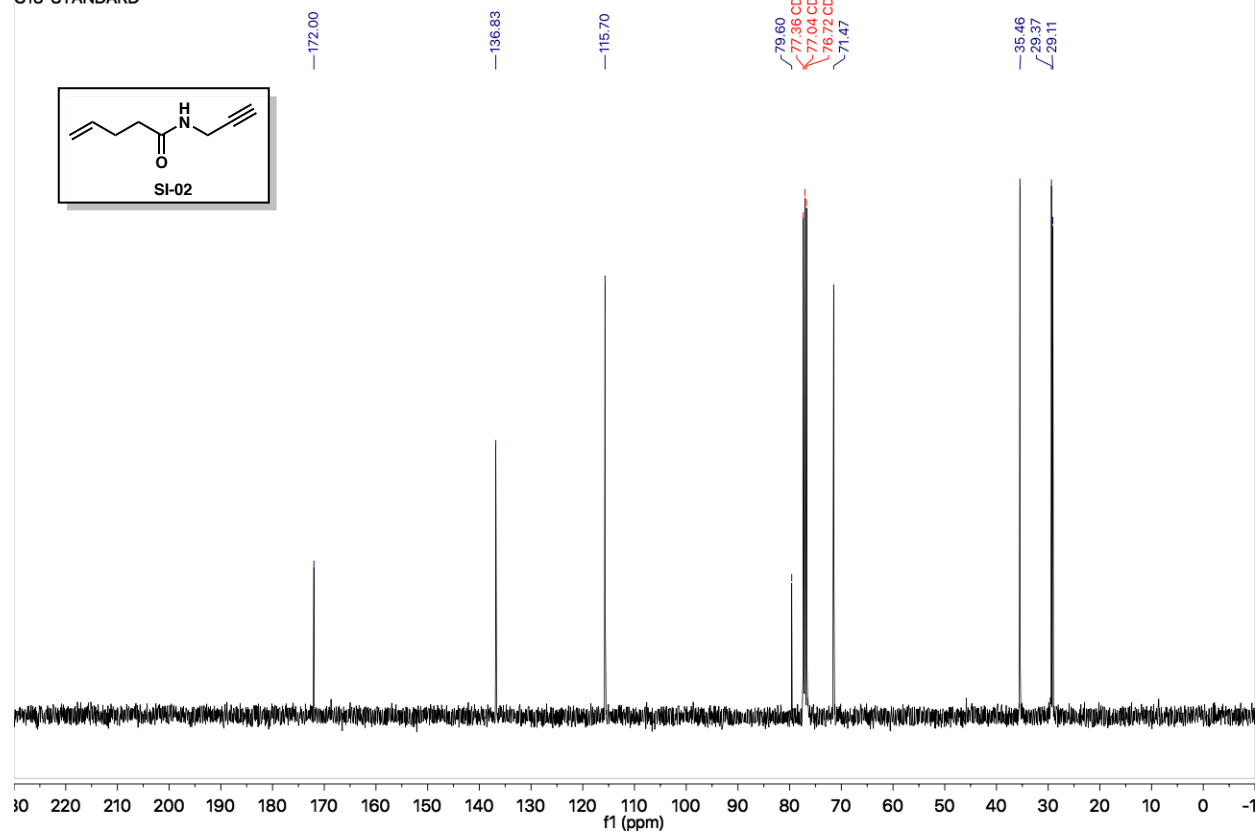

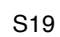

HSS-V-034\_13C\_PURE

Carbon spectrum

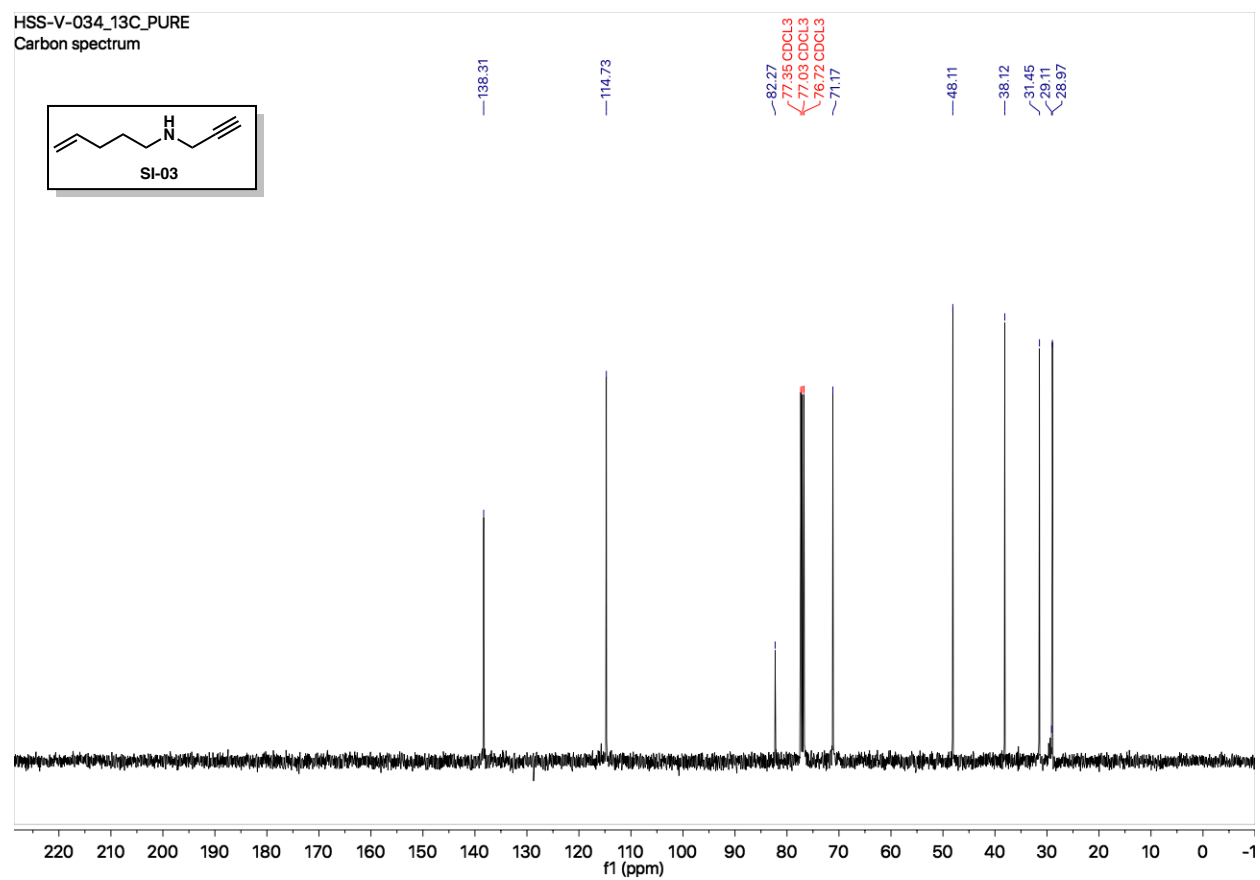

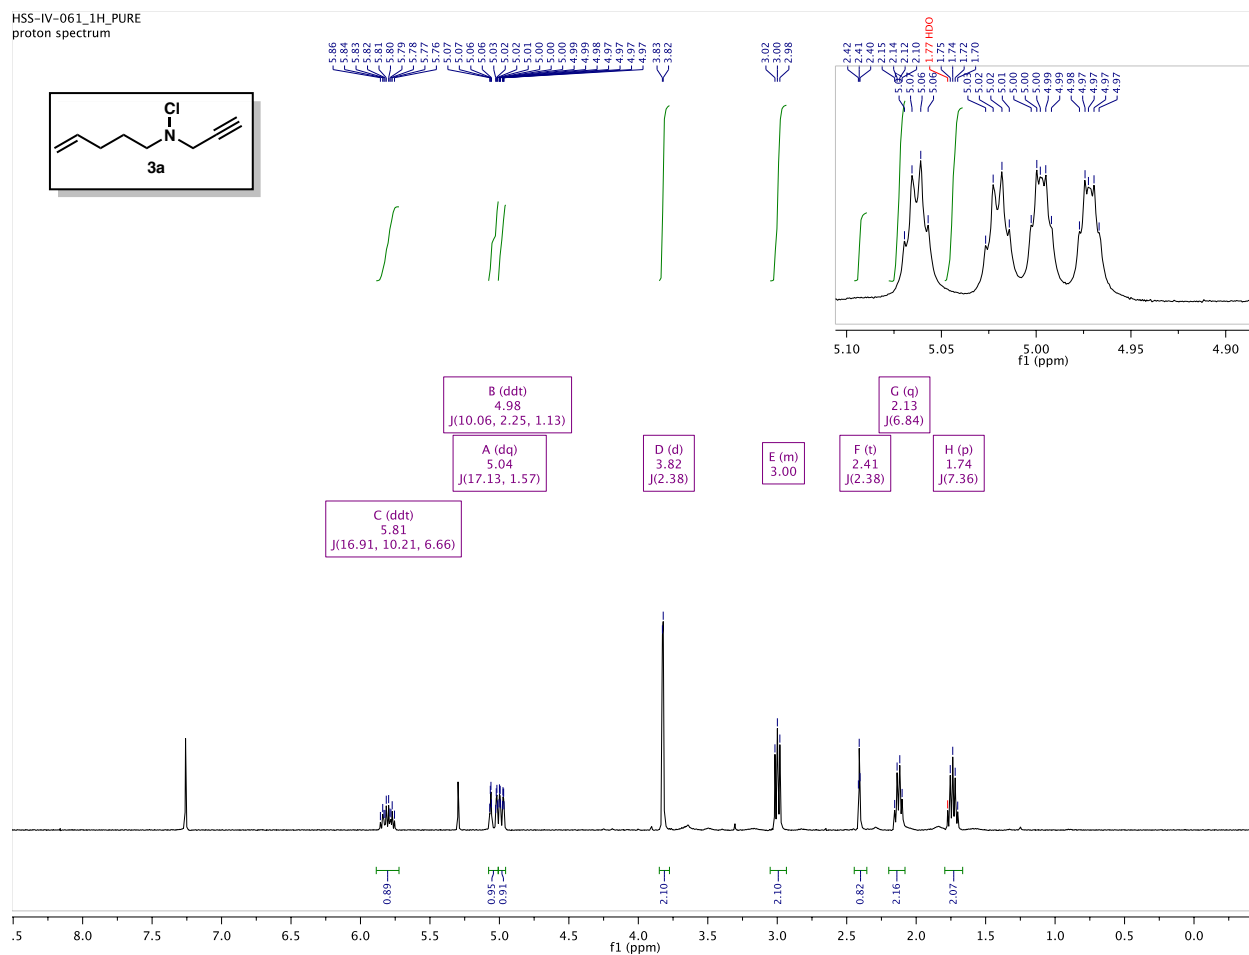

HSS-V-043\_13C\_PURE  
C13-STANDARD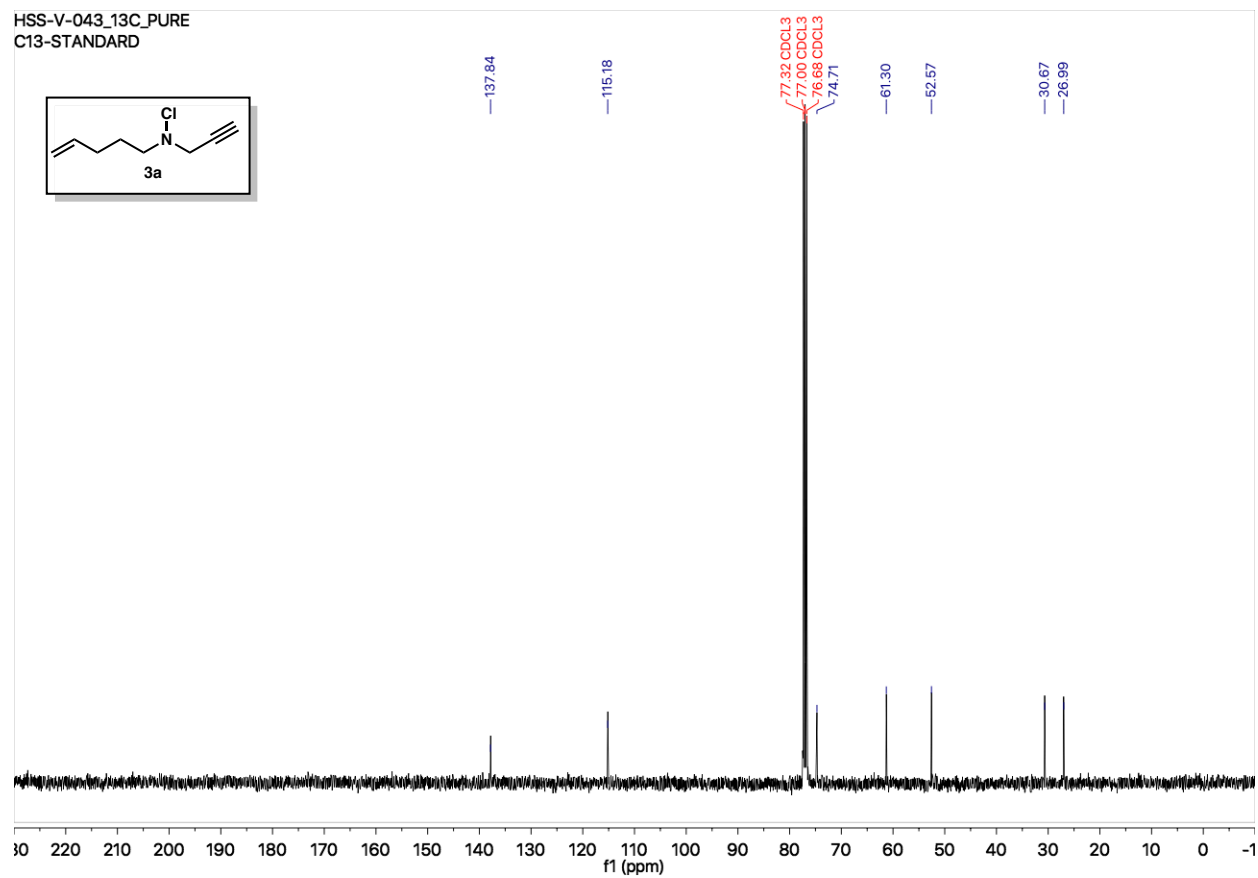



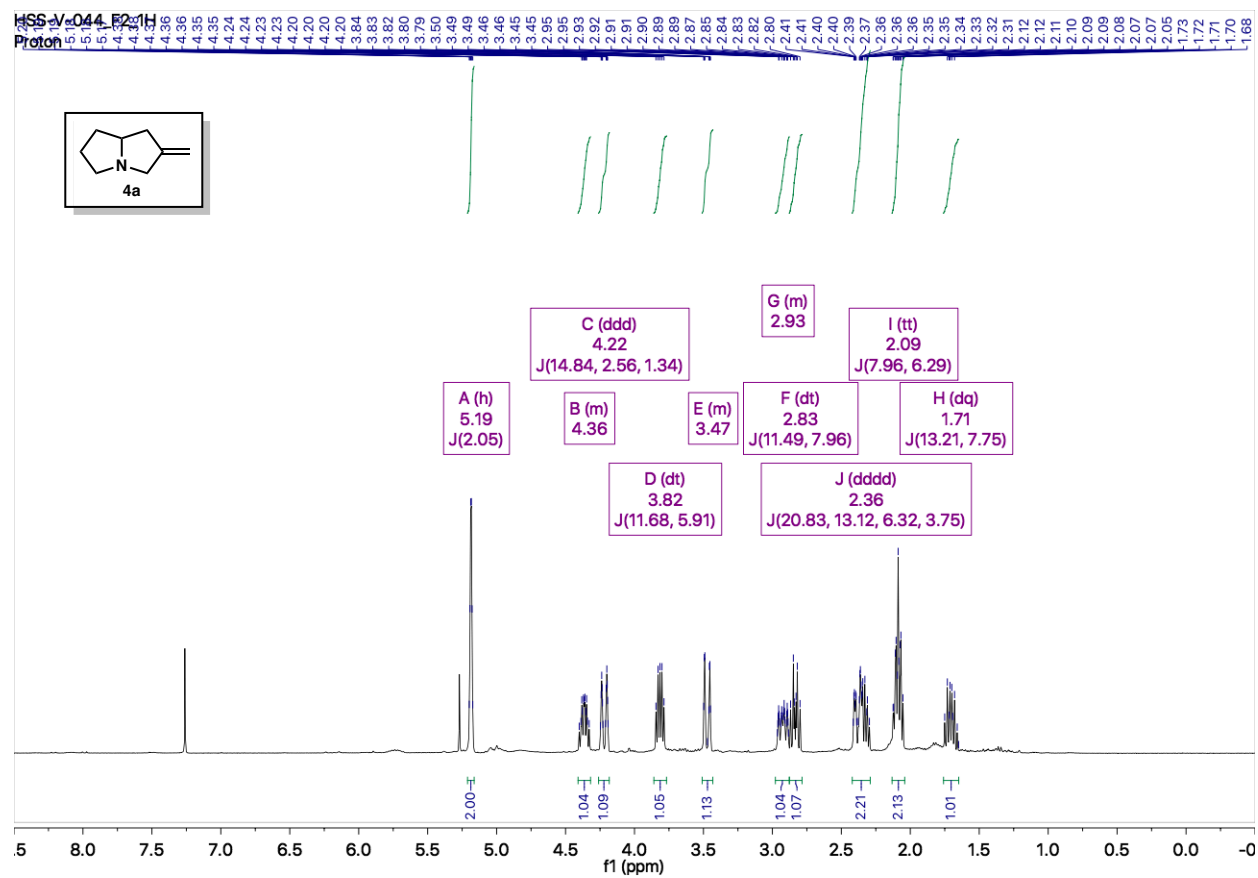

HSS-V-044\_F2\_13C  
C13-STANDARD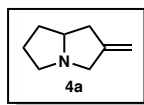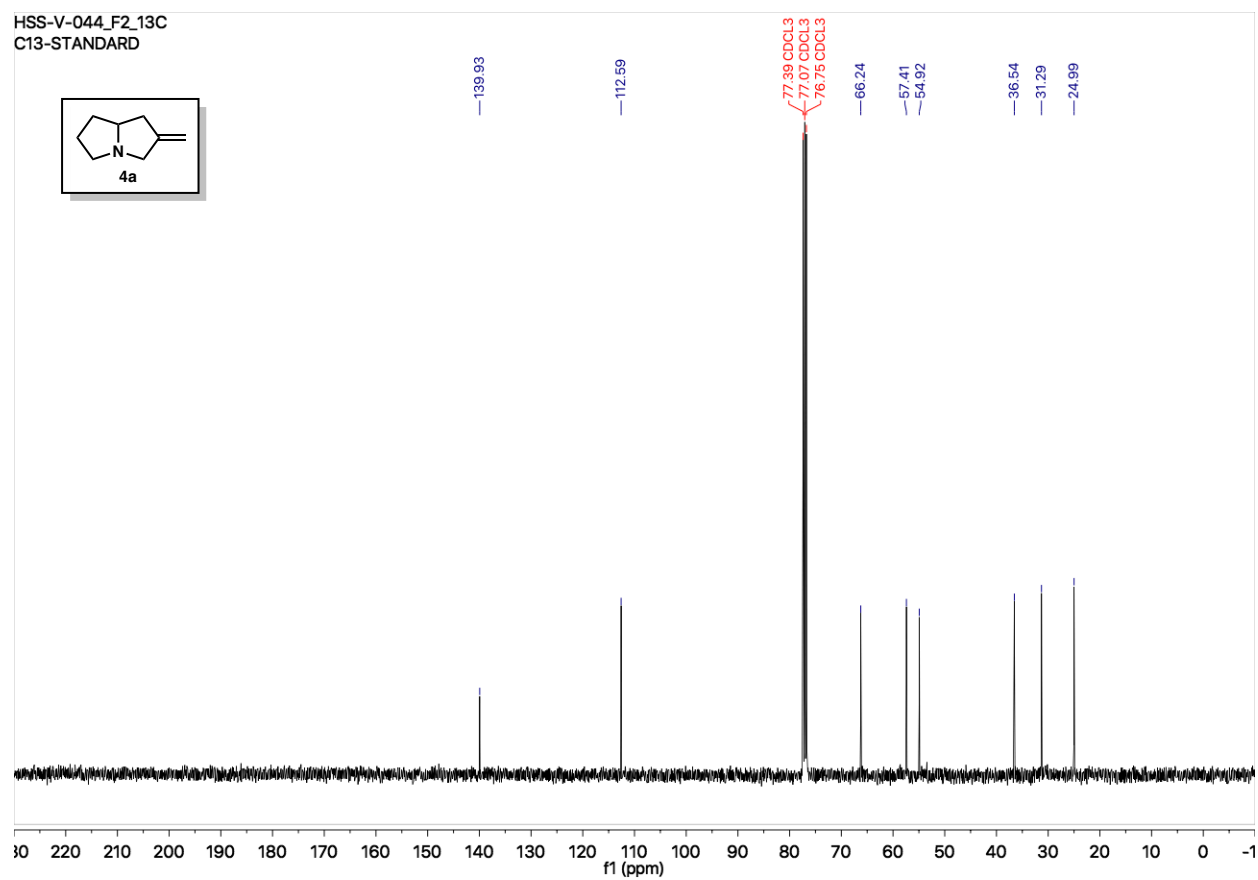

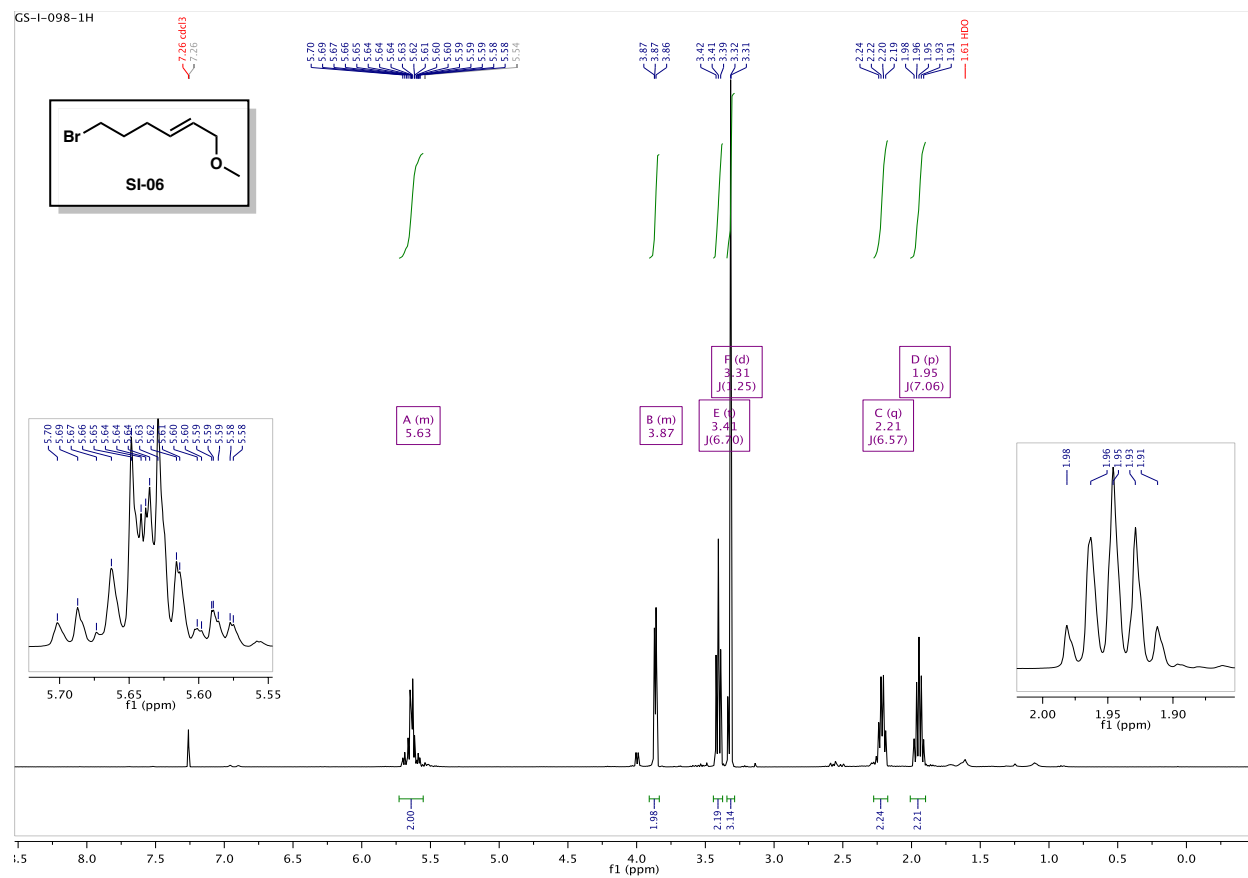

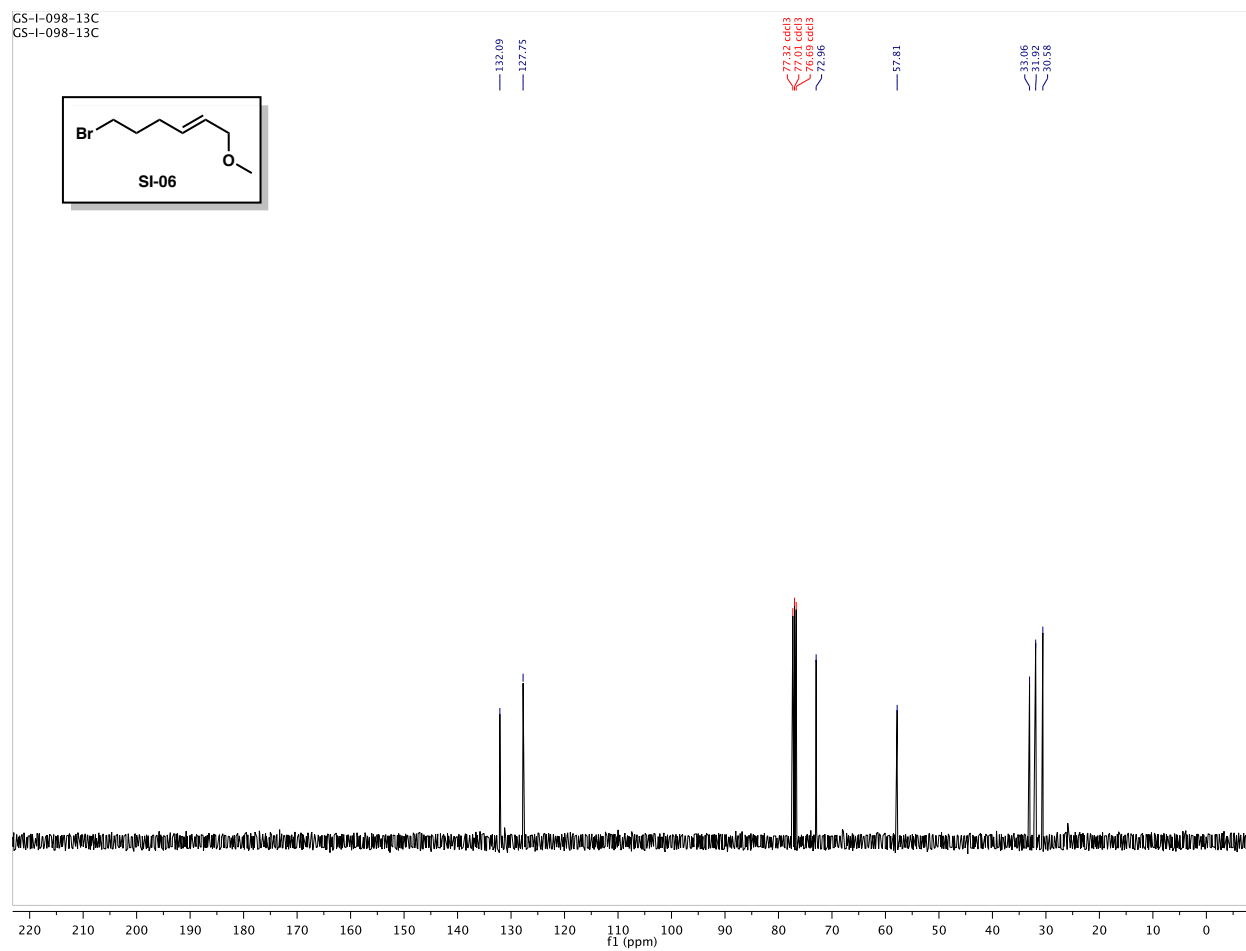

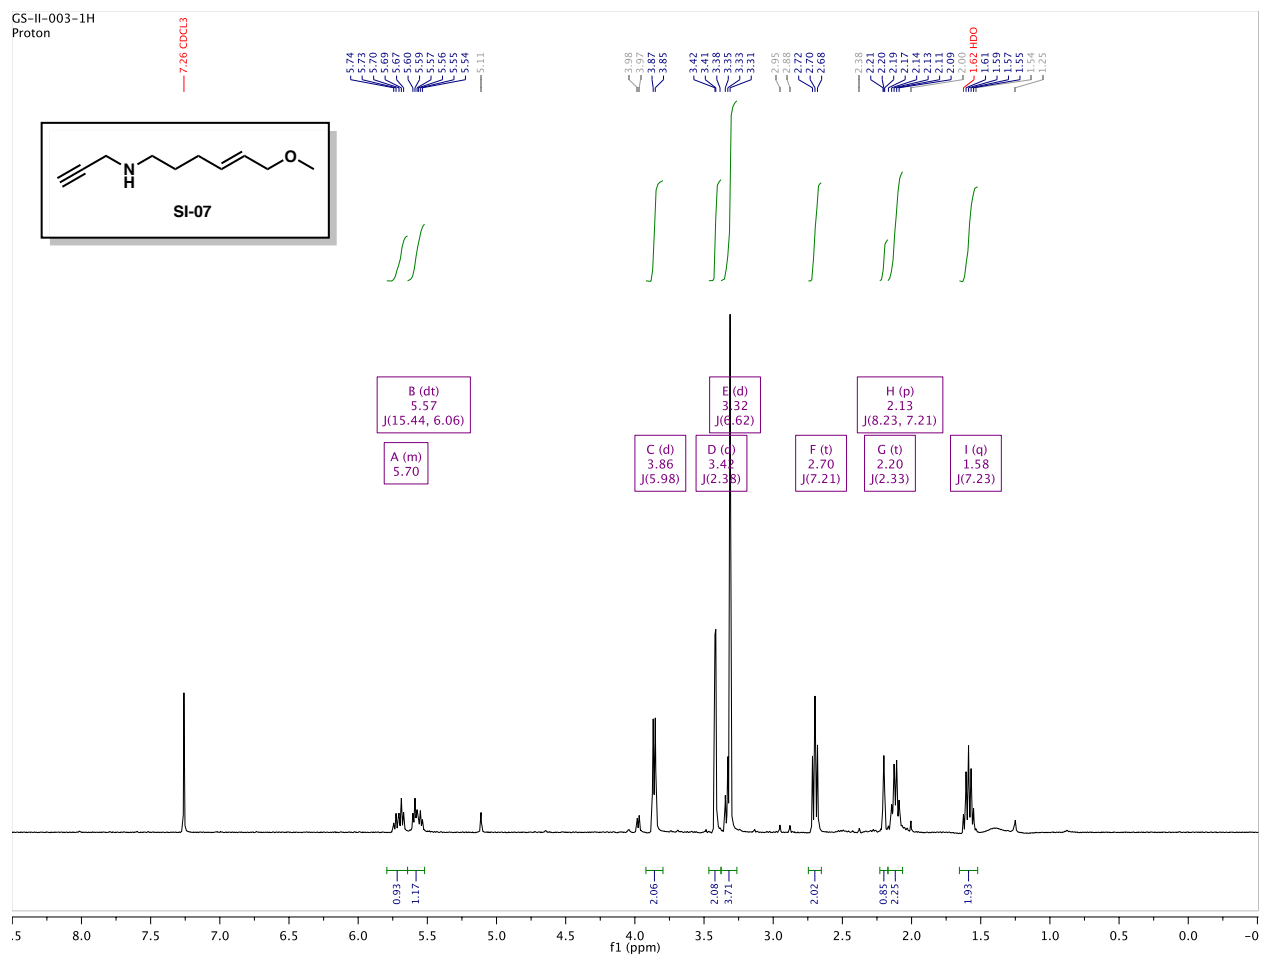

GS-II-003-13C-1  
C13-STANDARD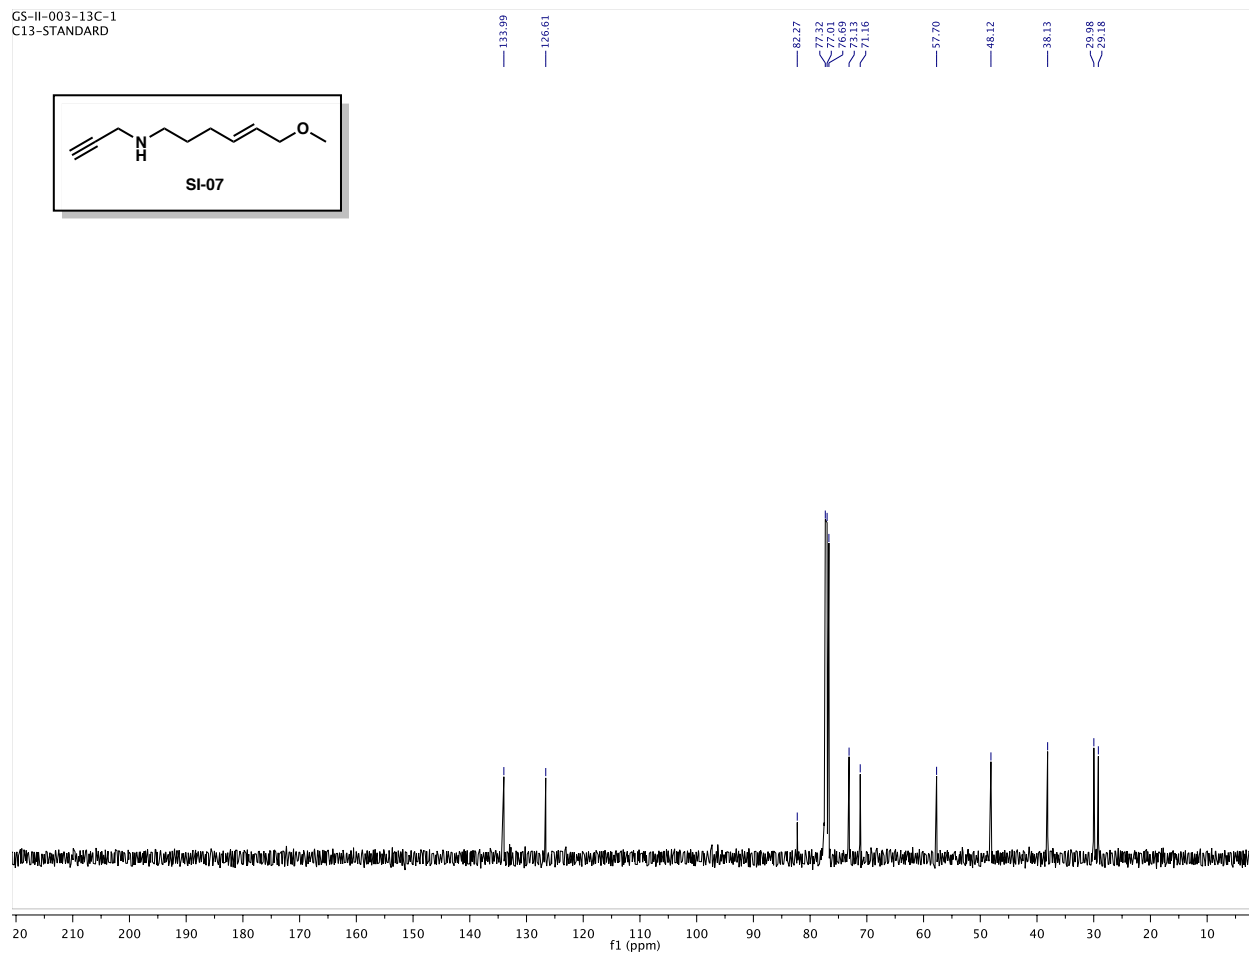

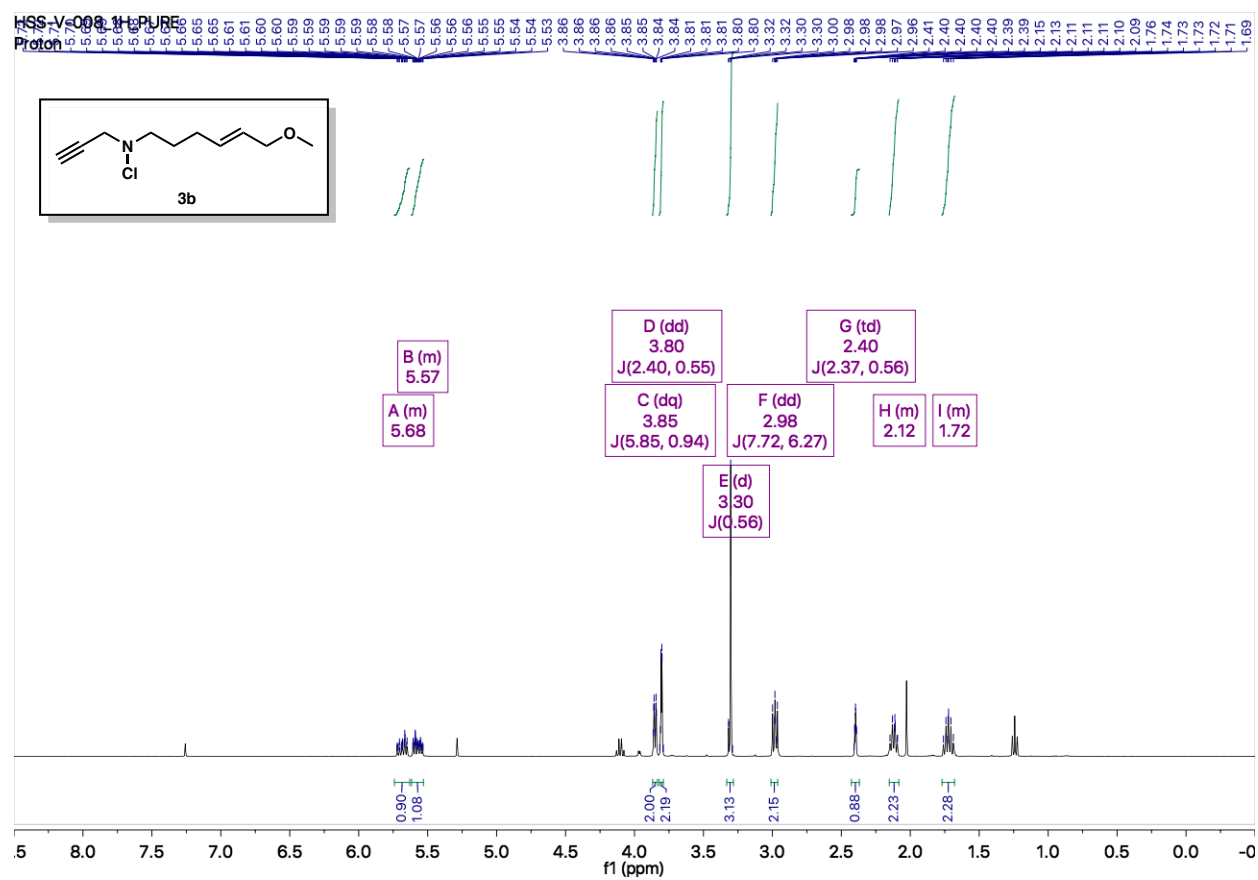



HSS-V-008\_13C\_PURE  
C13-STANDARD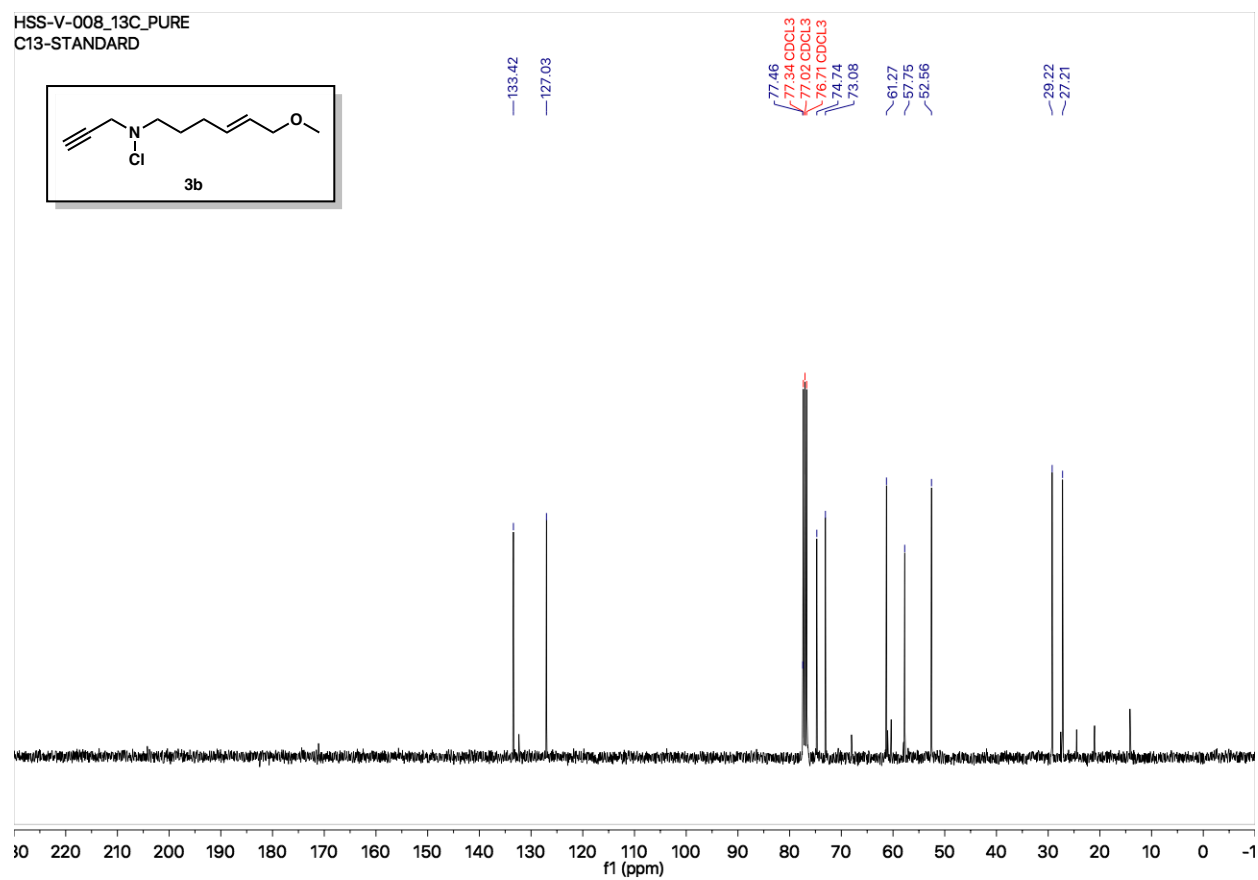

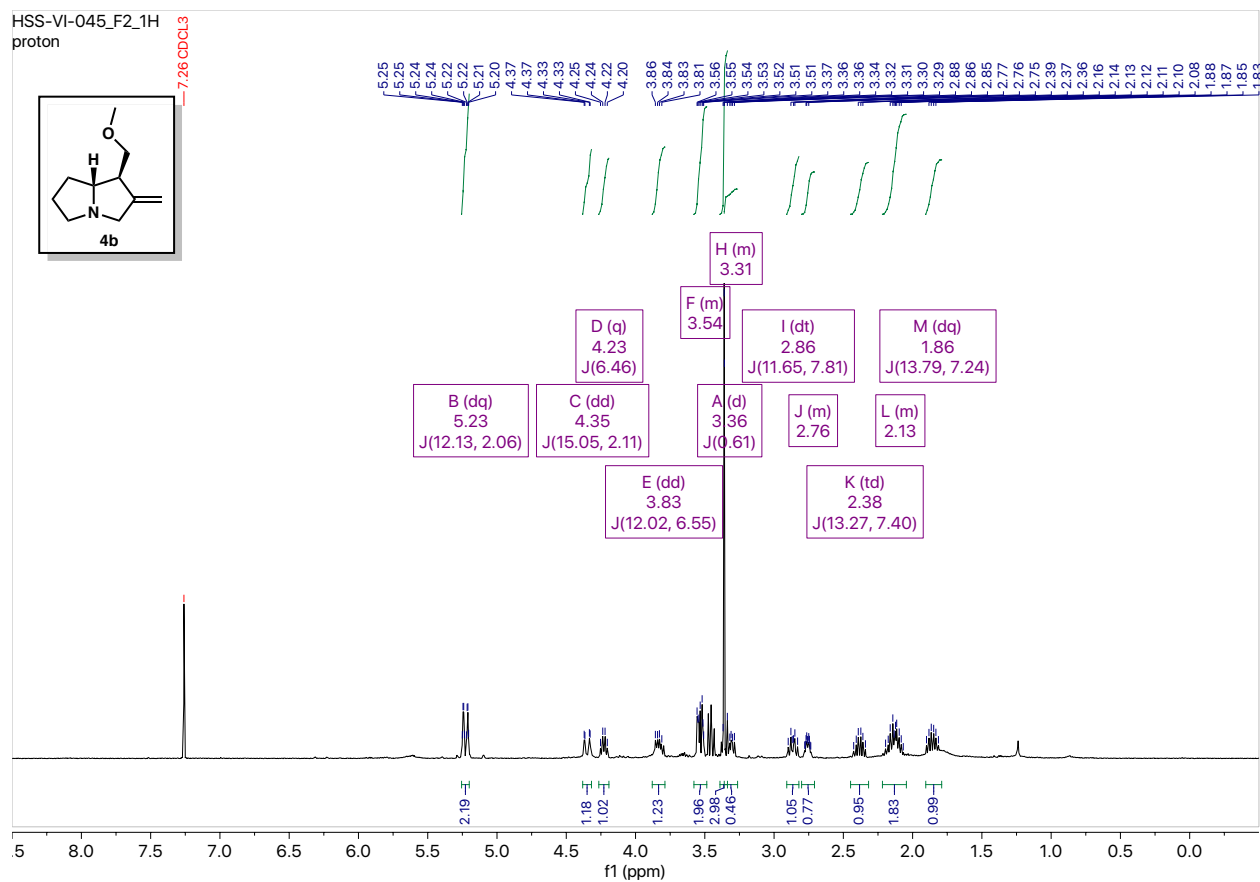

HSS-VI-045\_F2\_13C

Gradient Shimming

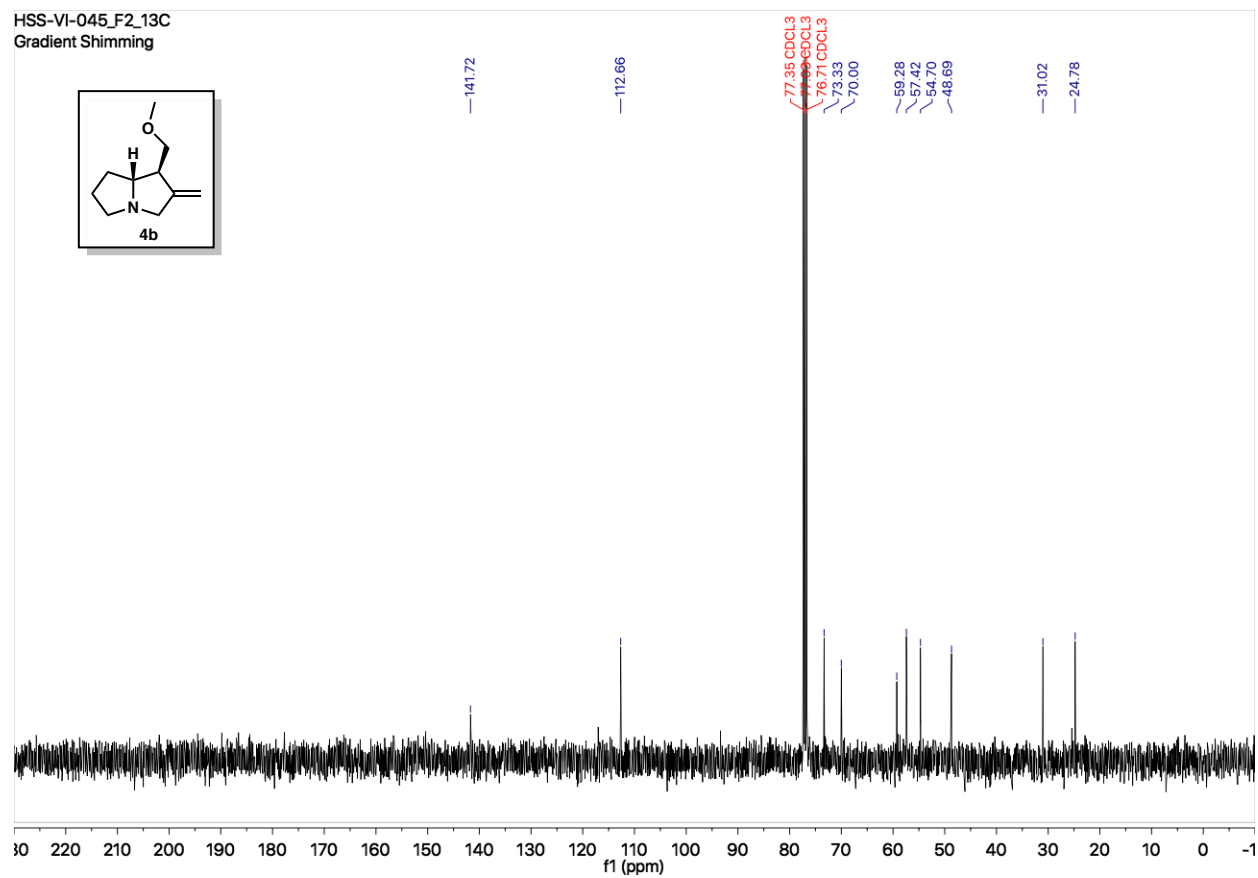

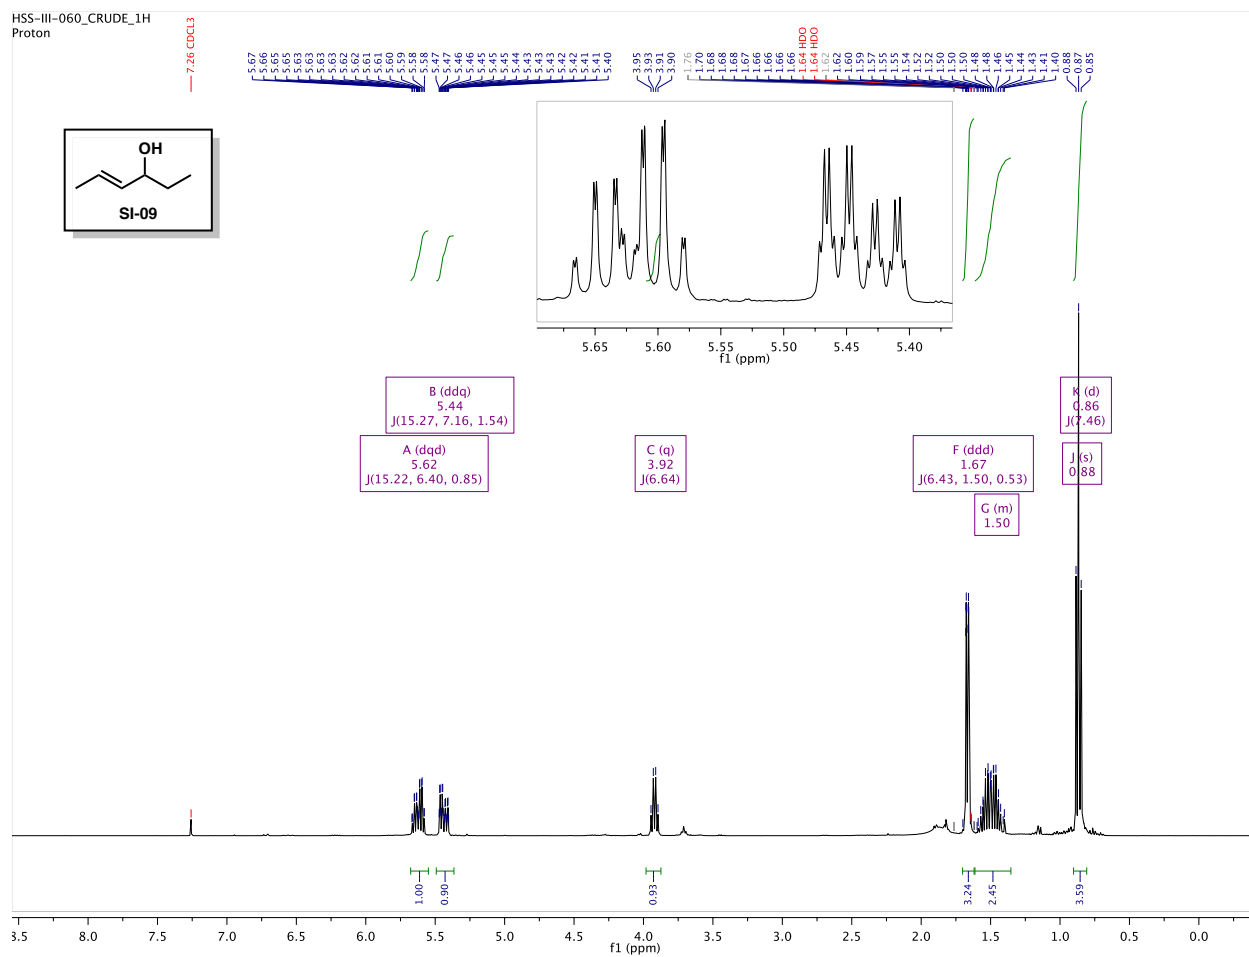

HSS-III-060\_CRUDE\_13C  
C13-STANDARD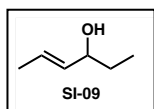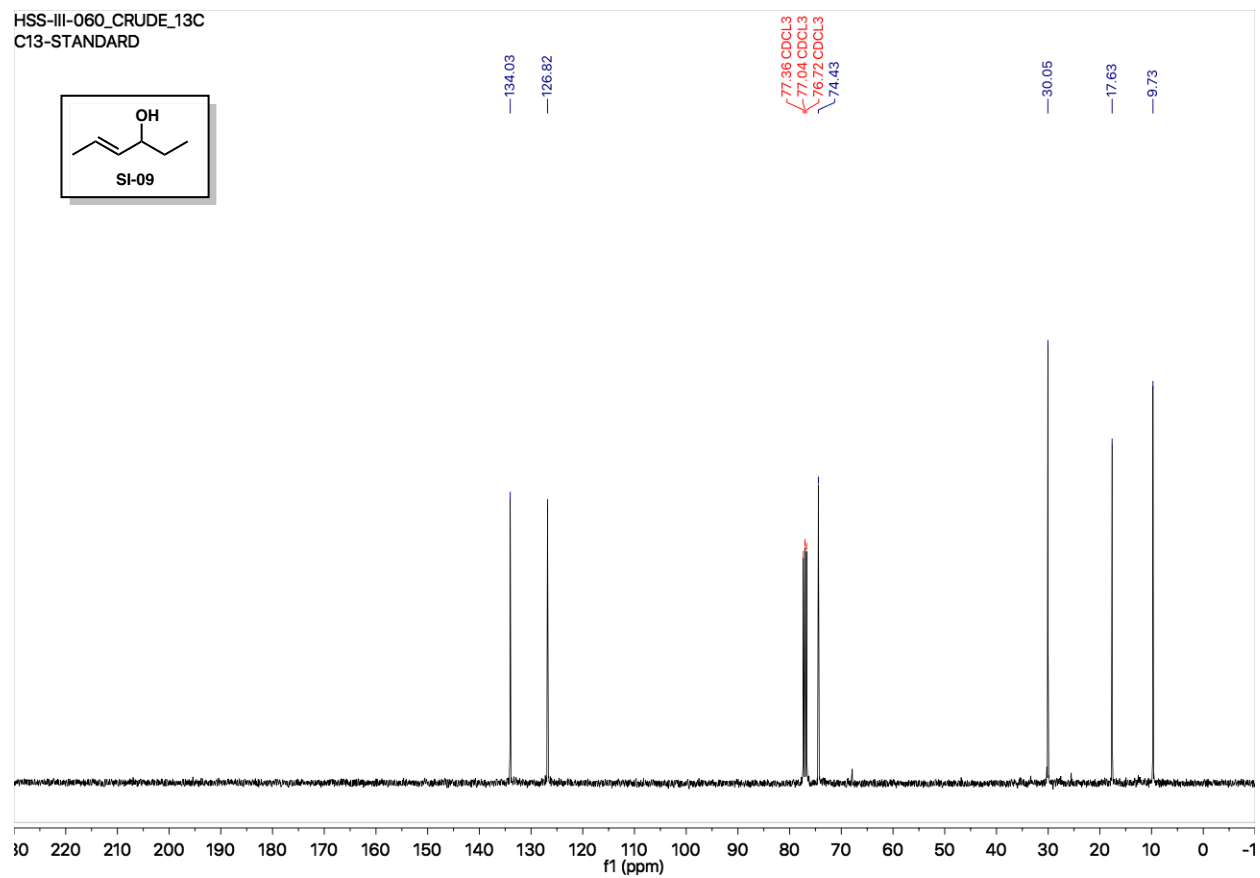

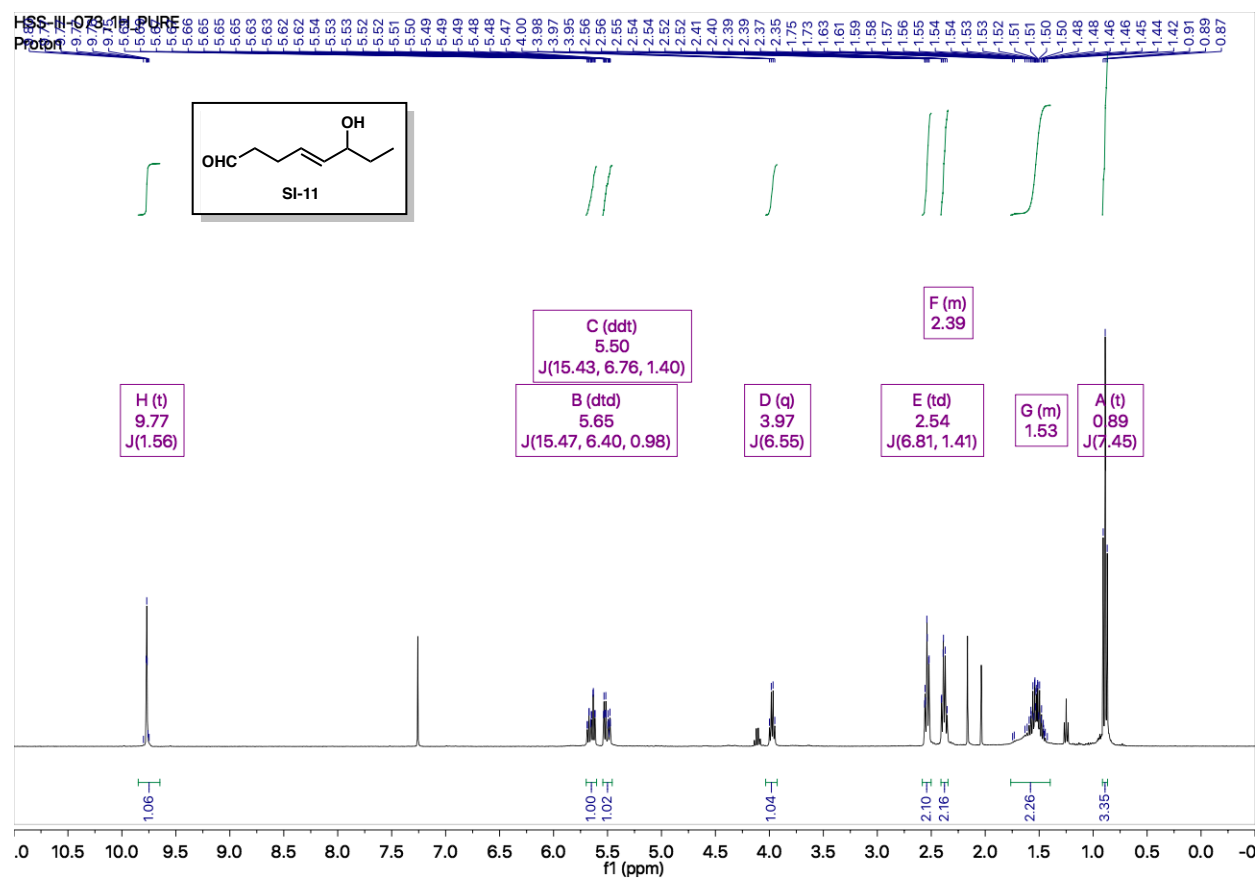

HSS-III-073\_13C\_PURE  
C13-STANDARD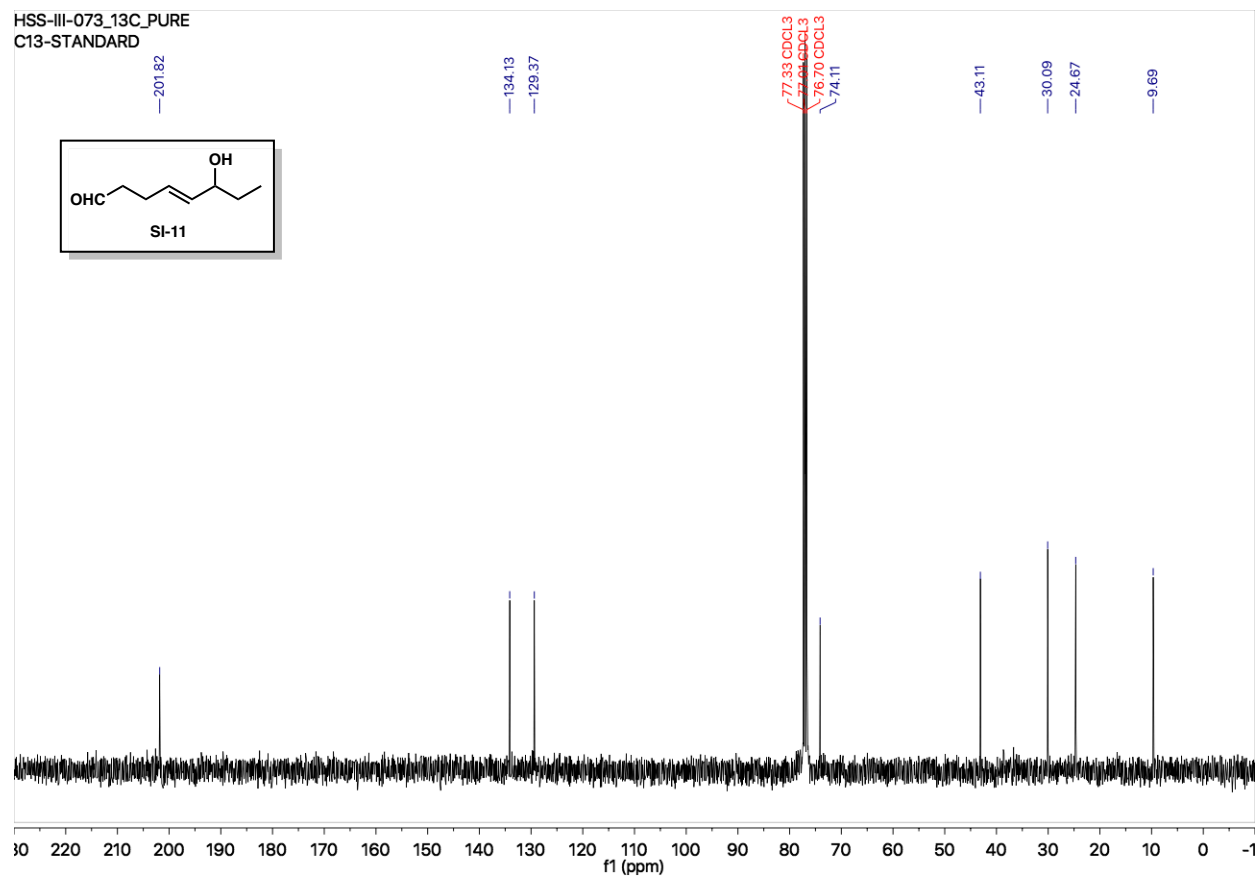



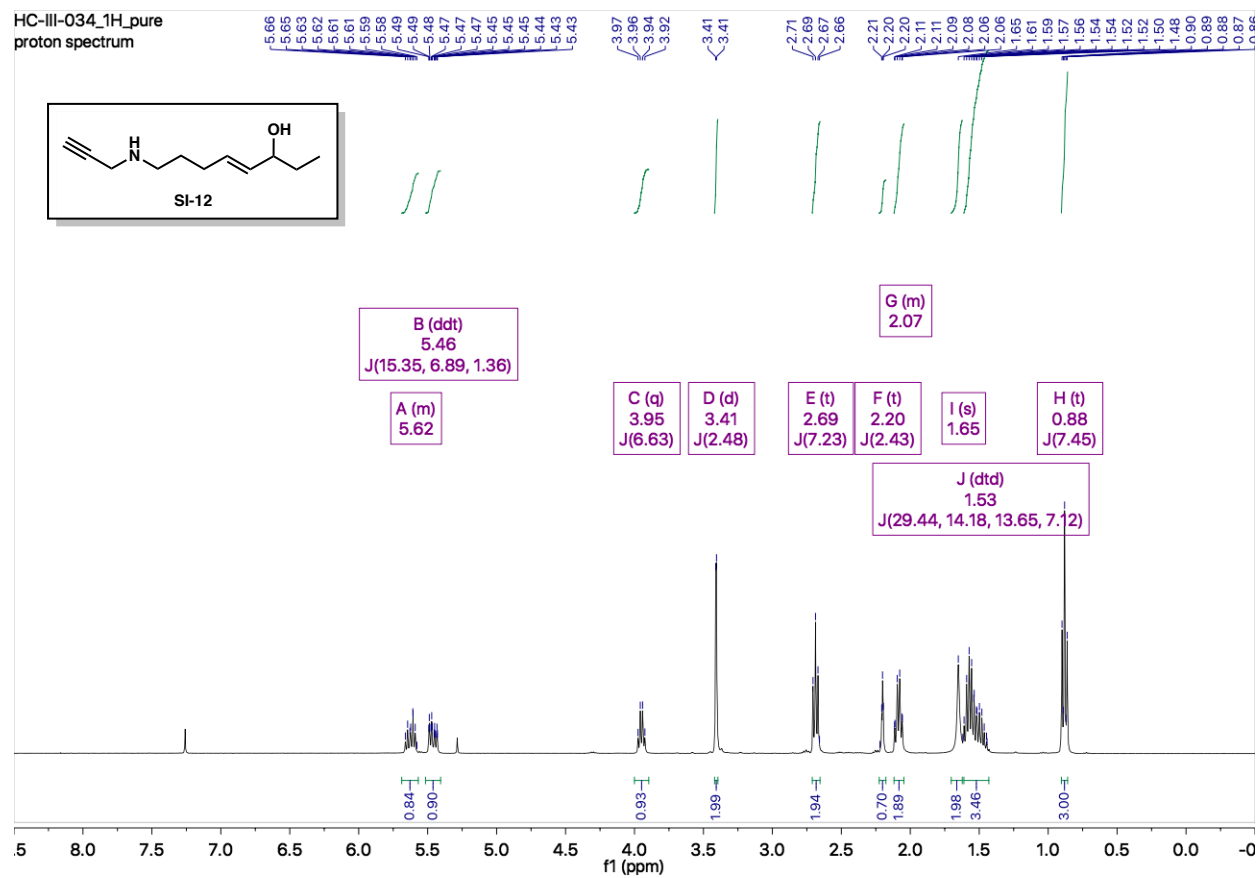

HC-III-034\_13C\_pure

Carbon spectrum

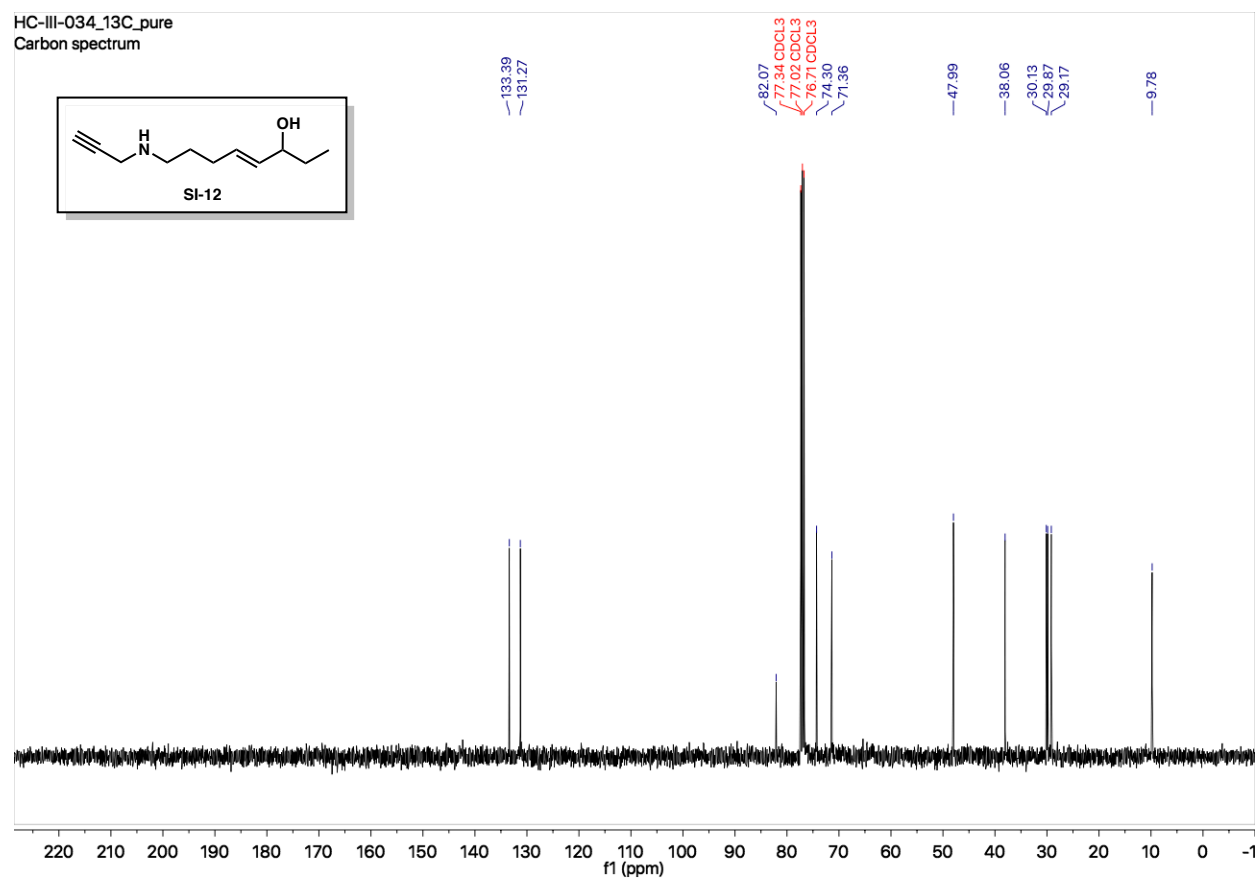

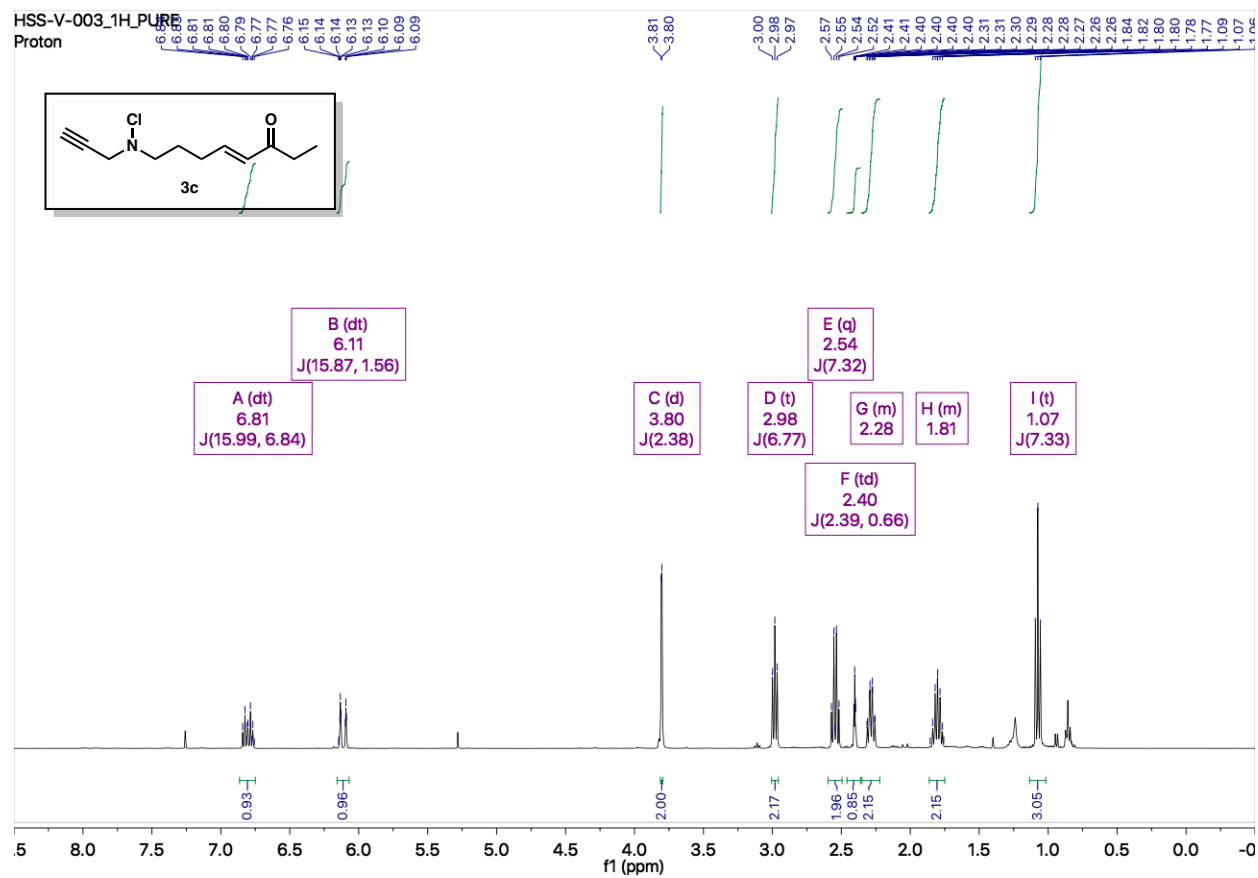

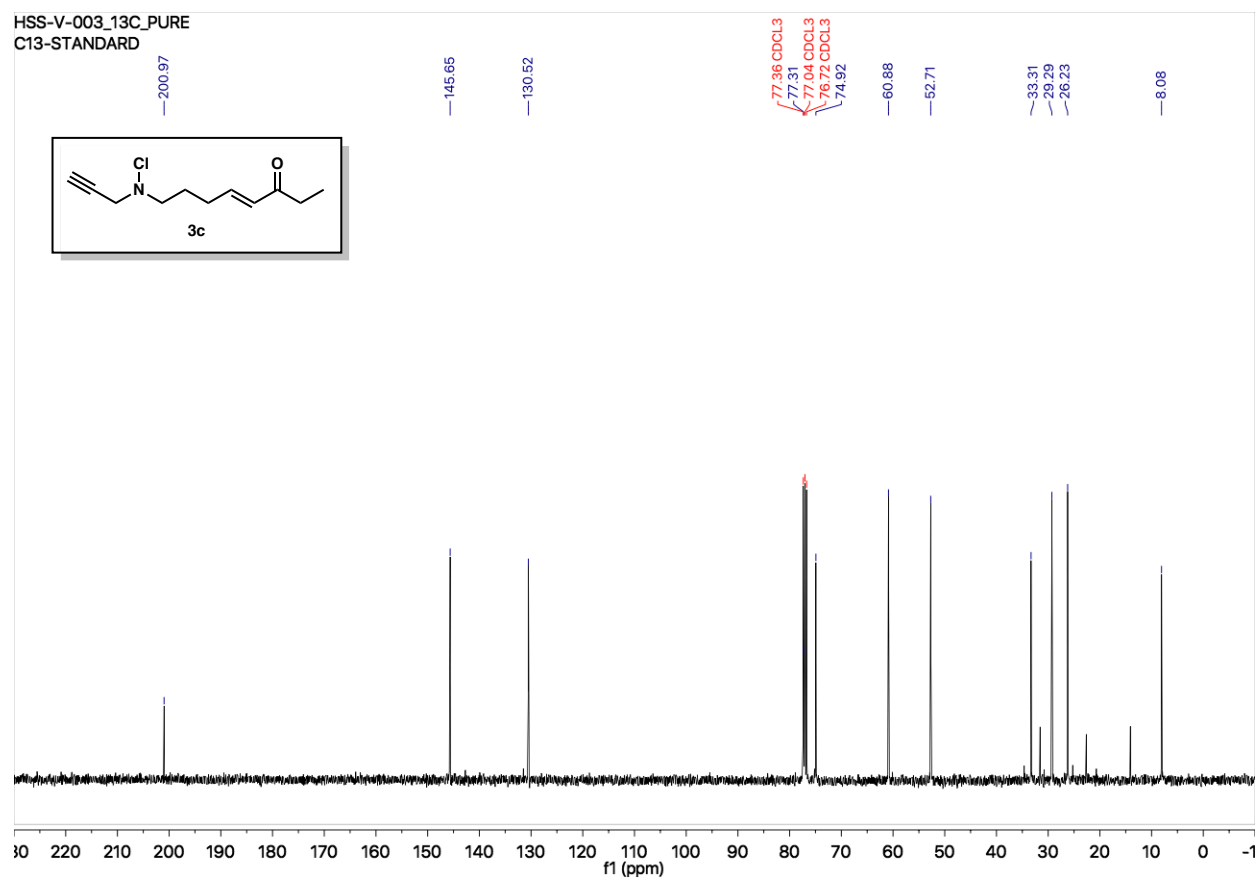

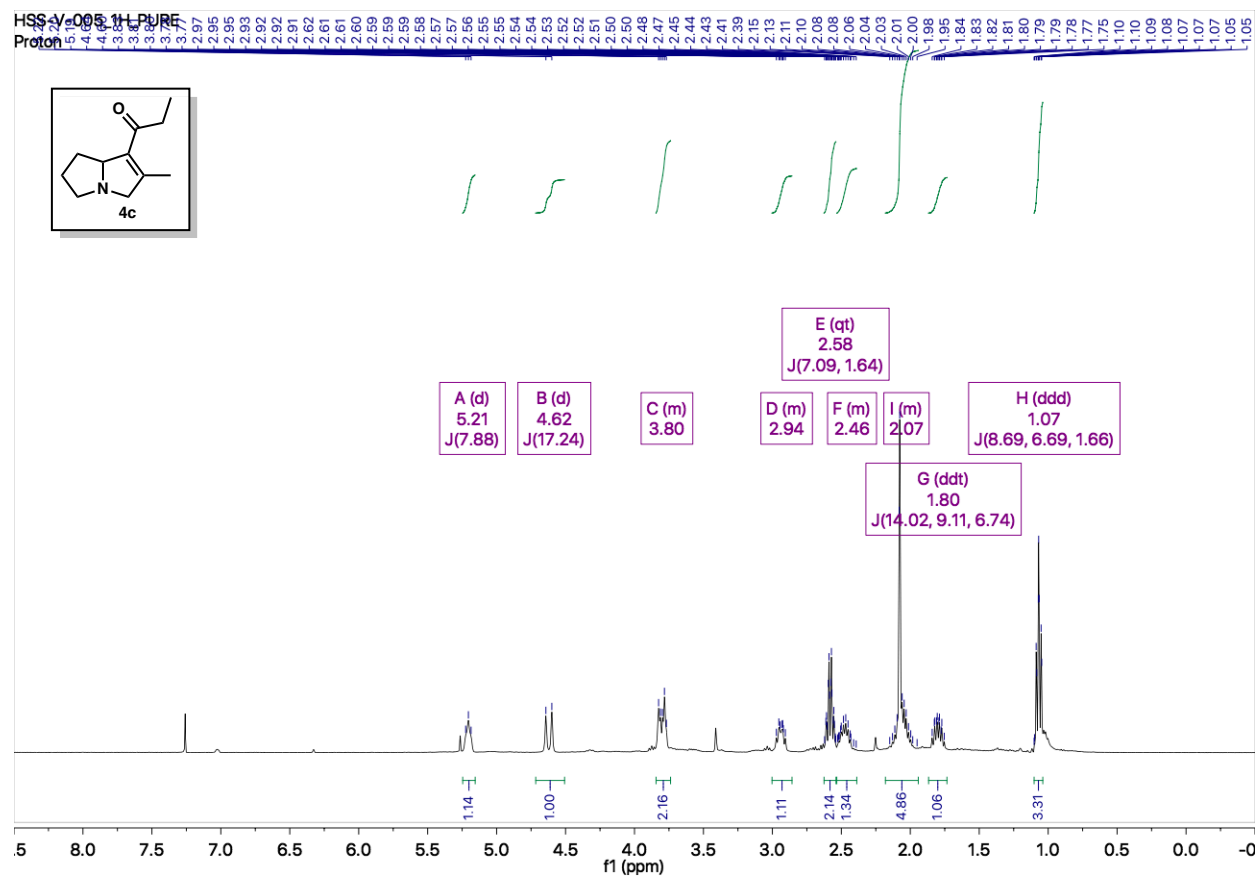

HSS-V-005\_13C\_PURE  
C13-STANDARD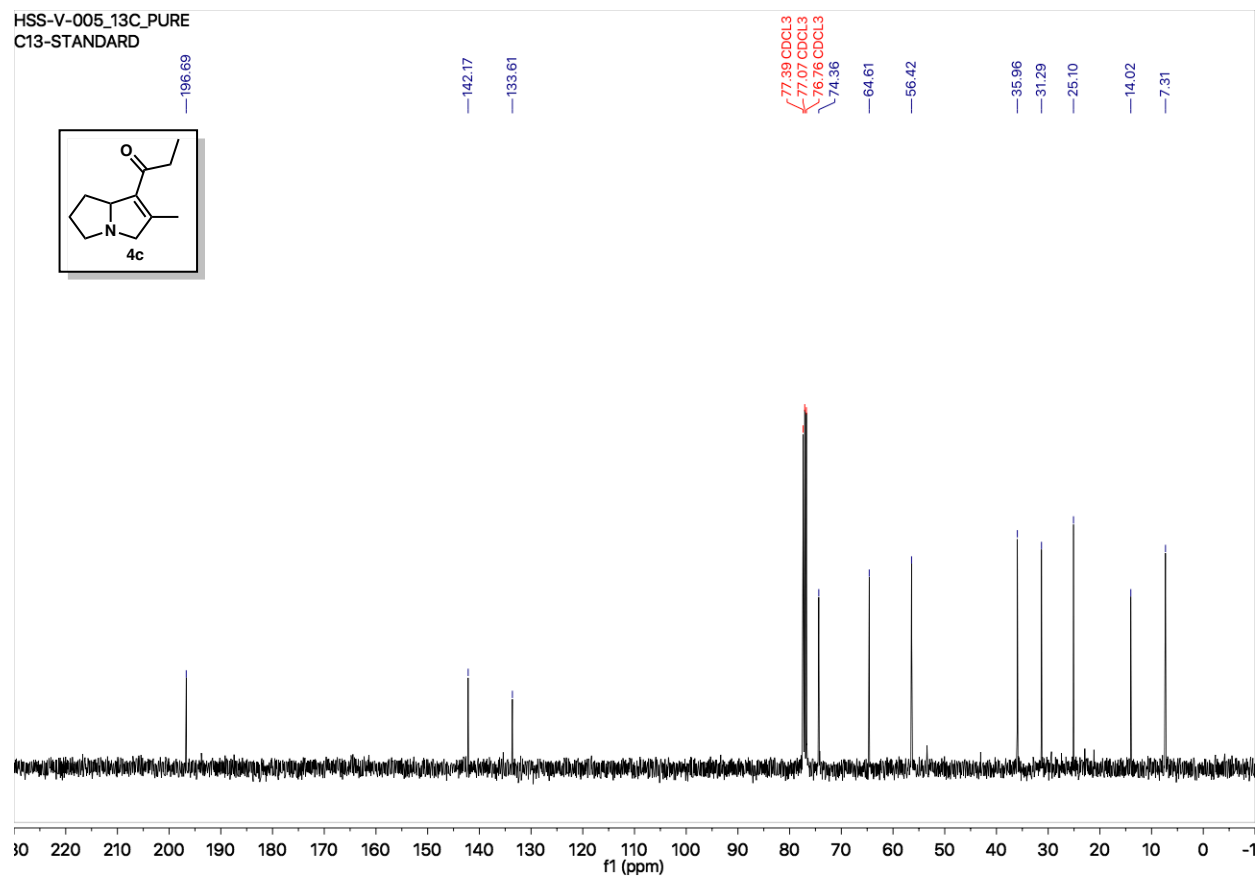

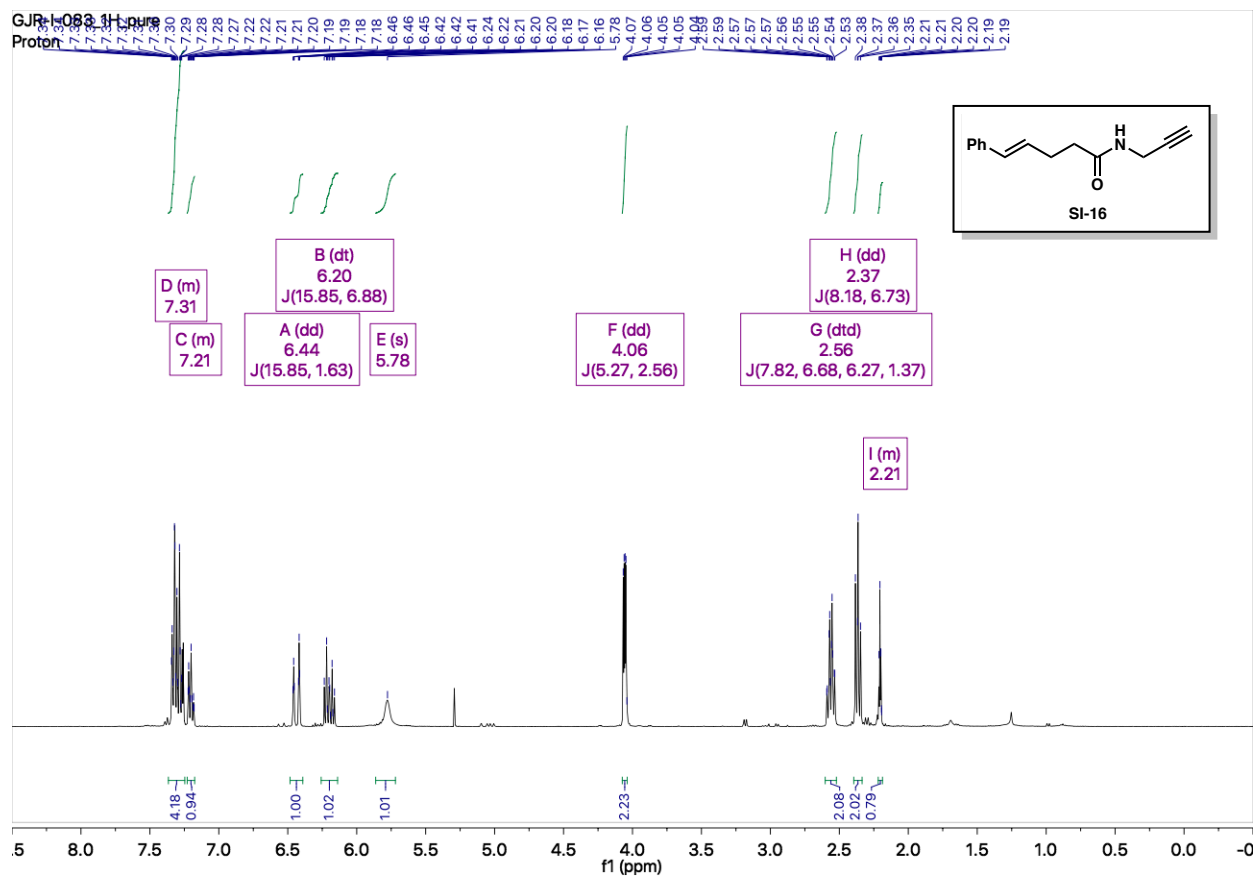

GJR-I-083\_13C\_pure  
C13-STANDARD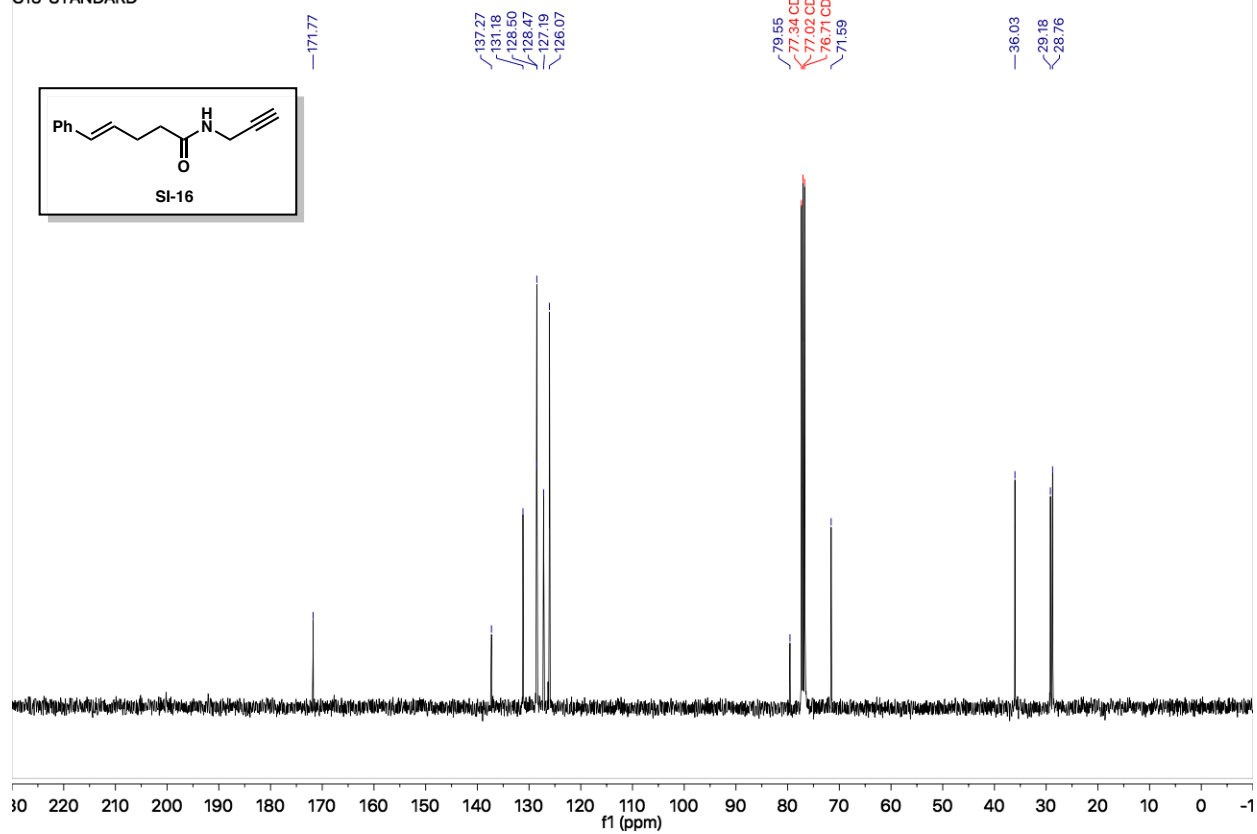



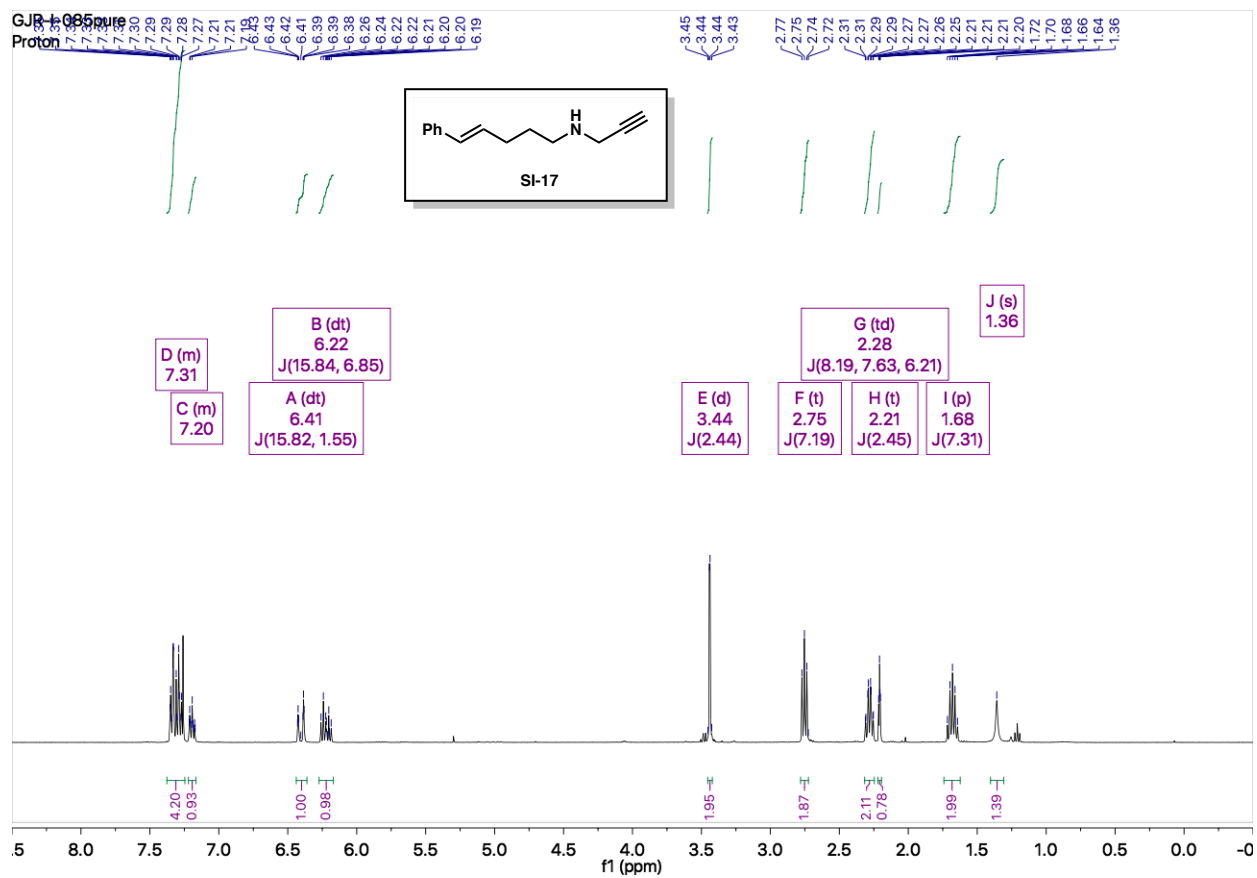

GJR-II-034\_13C

Carbon spectrum

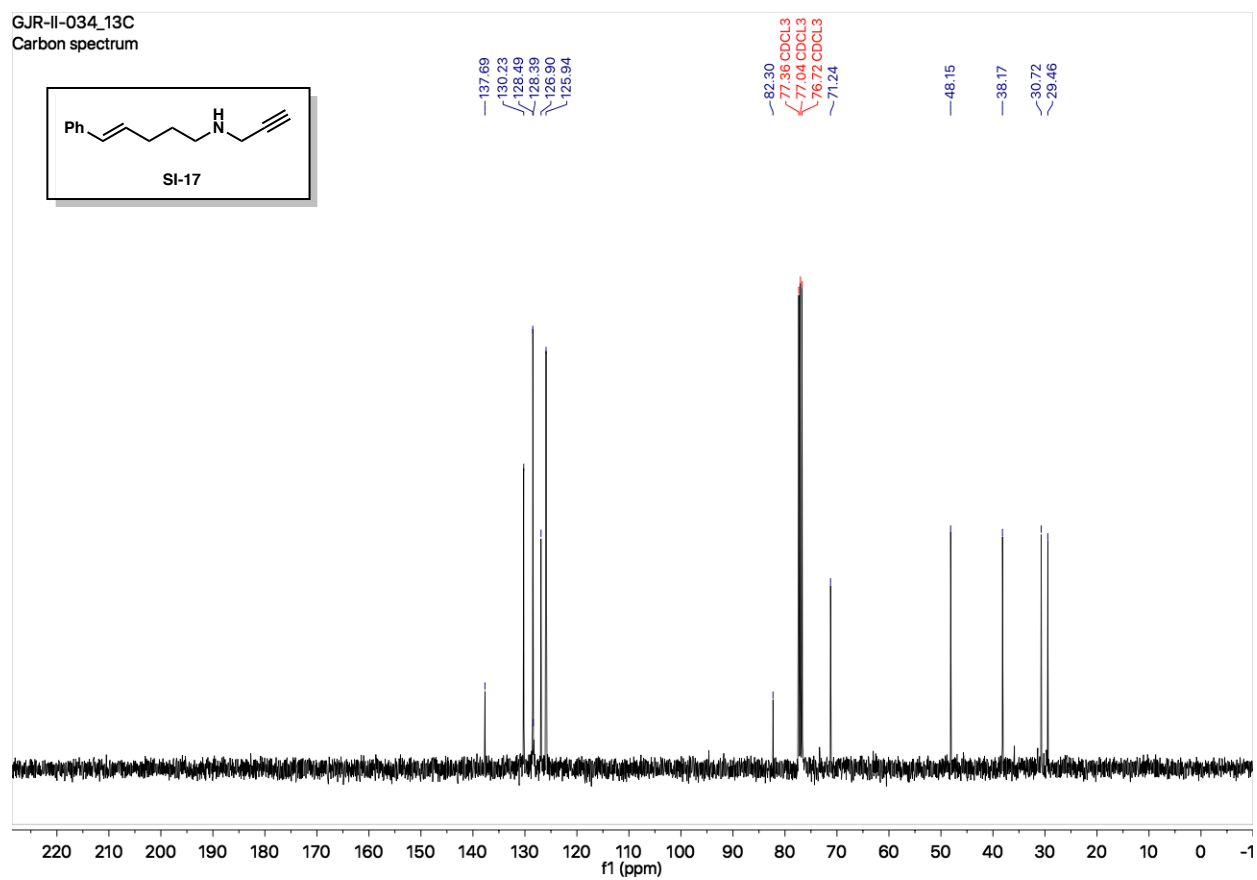

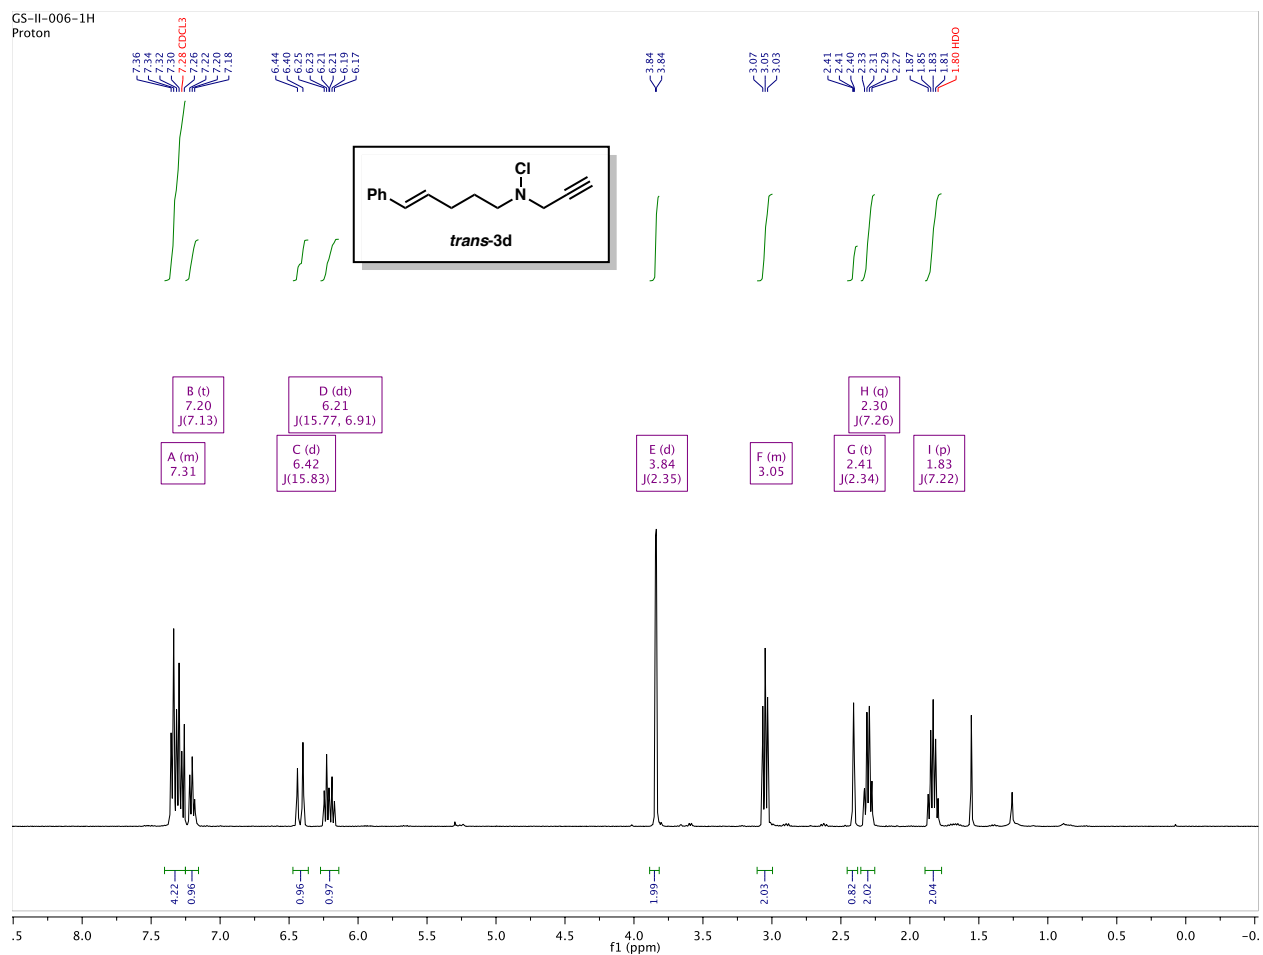

GS-II-006-13C  
C13-STANDARD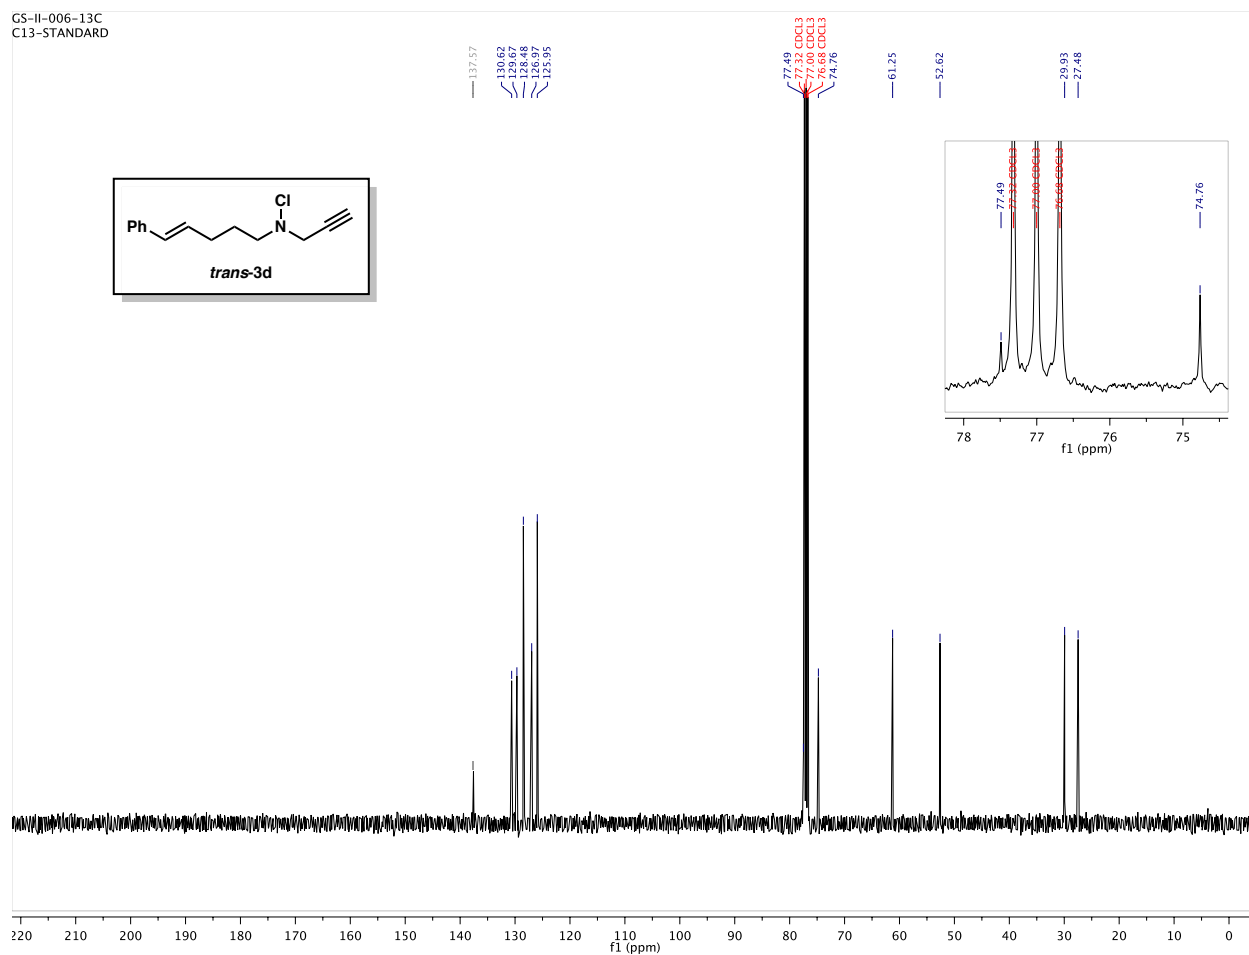

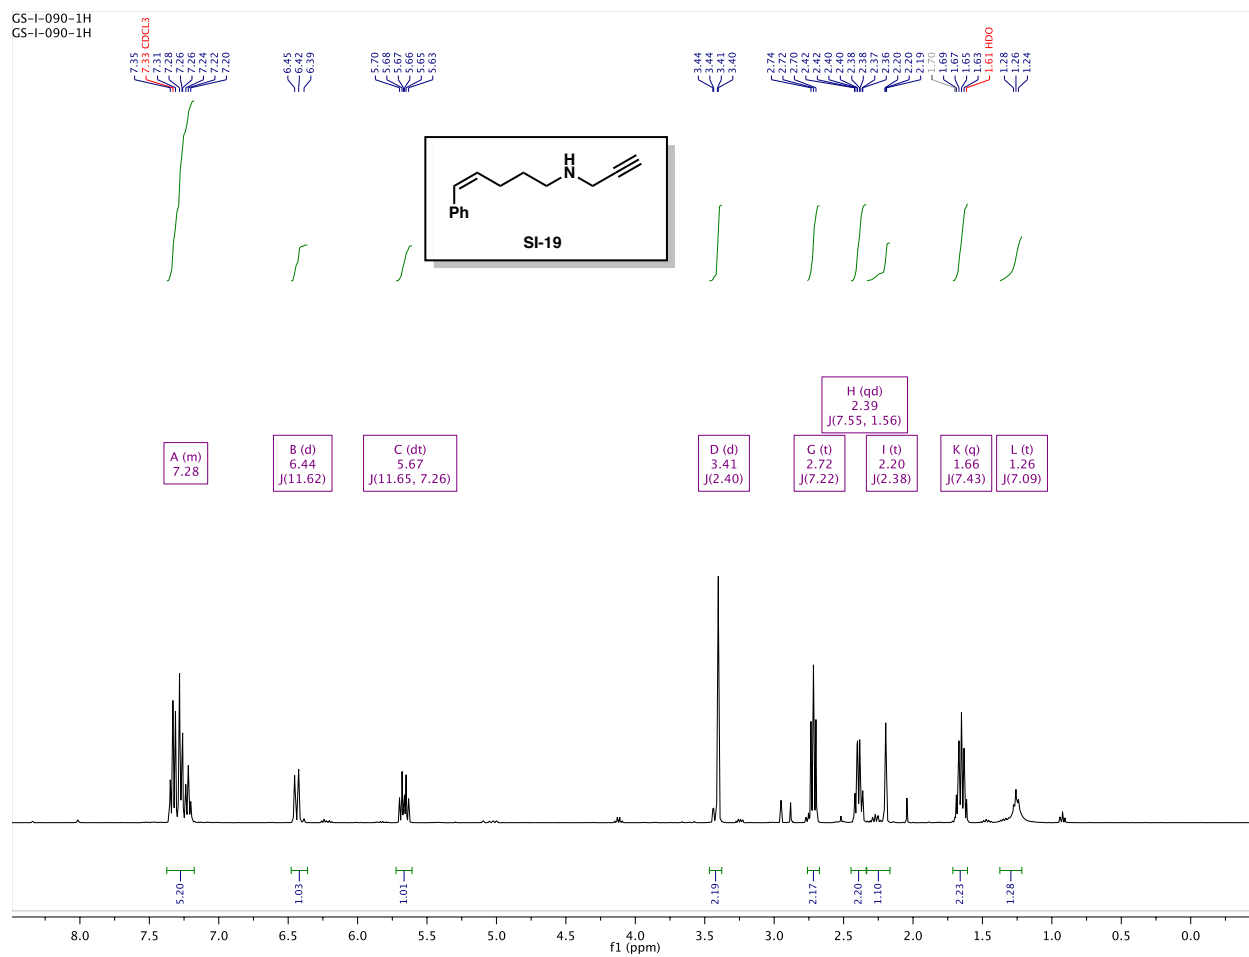

GS-I-090-13C  
C13-STANDARD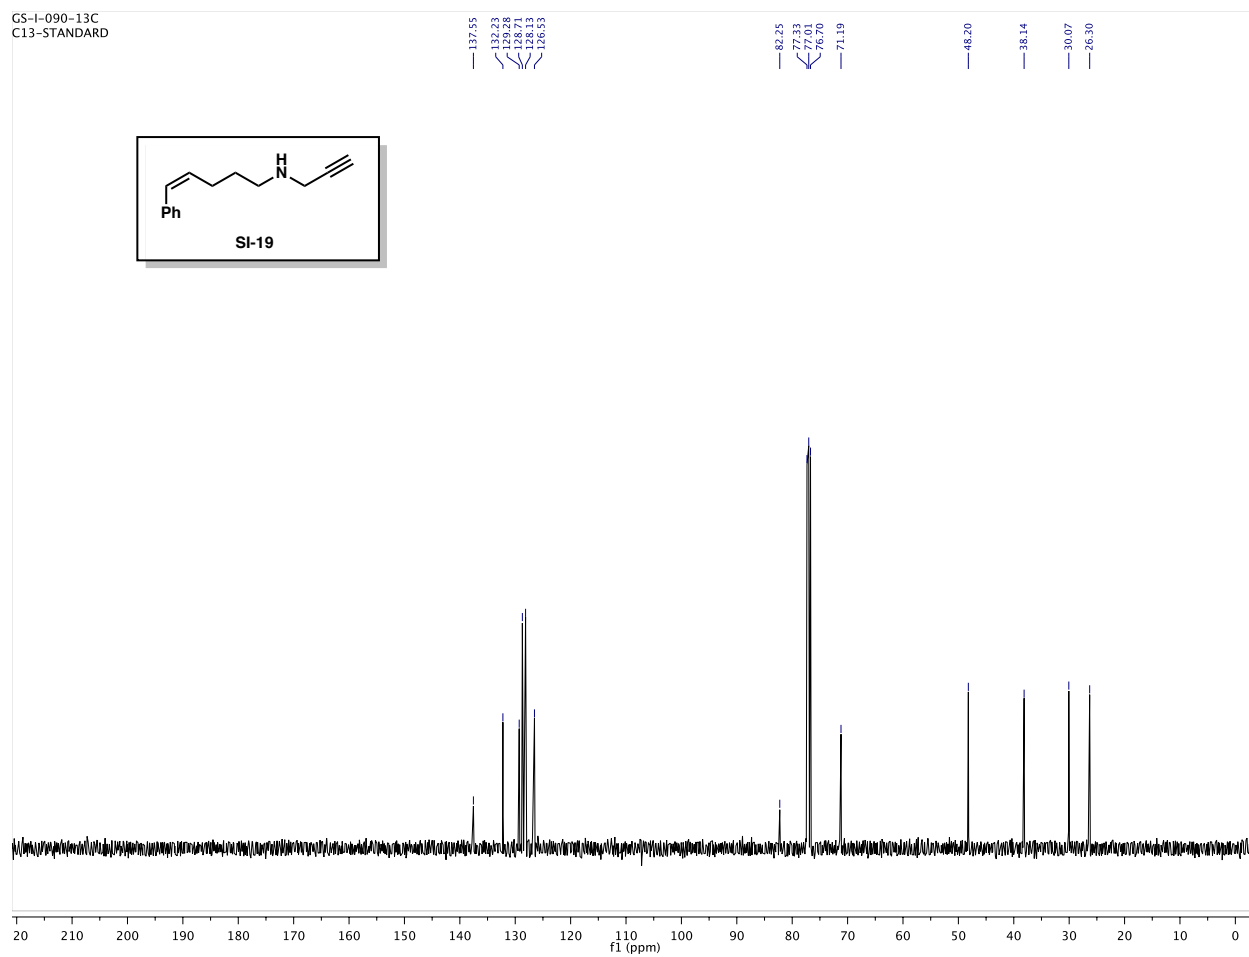

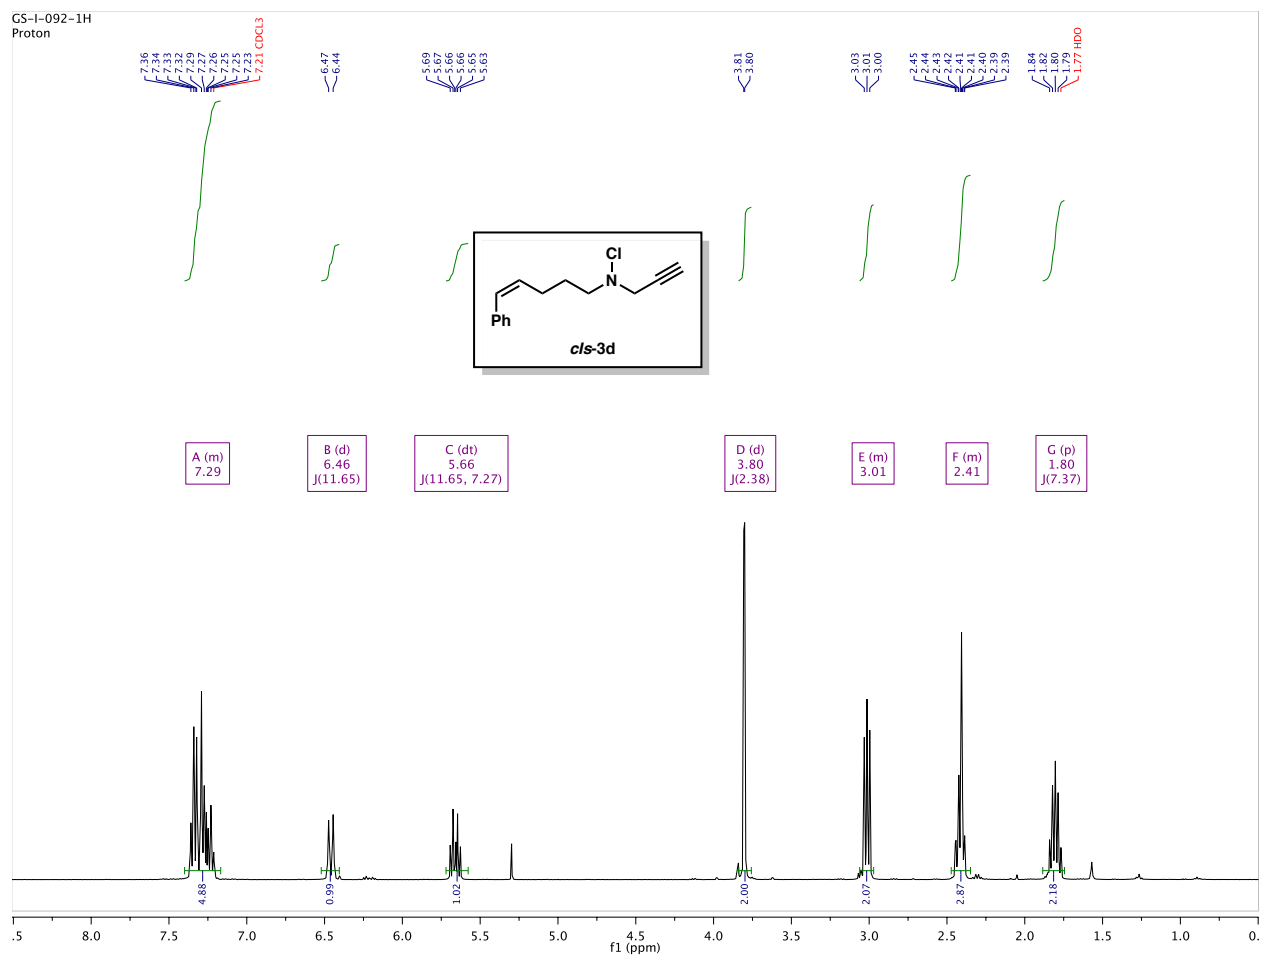

GS-I-092-13C  
C13-STANDARD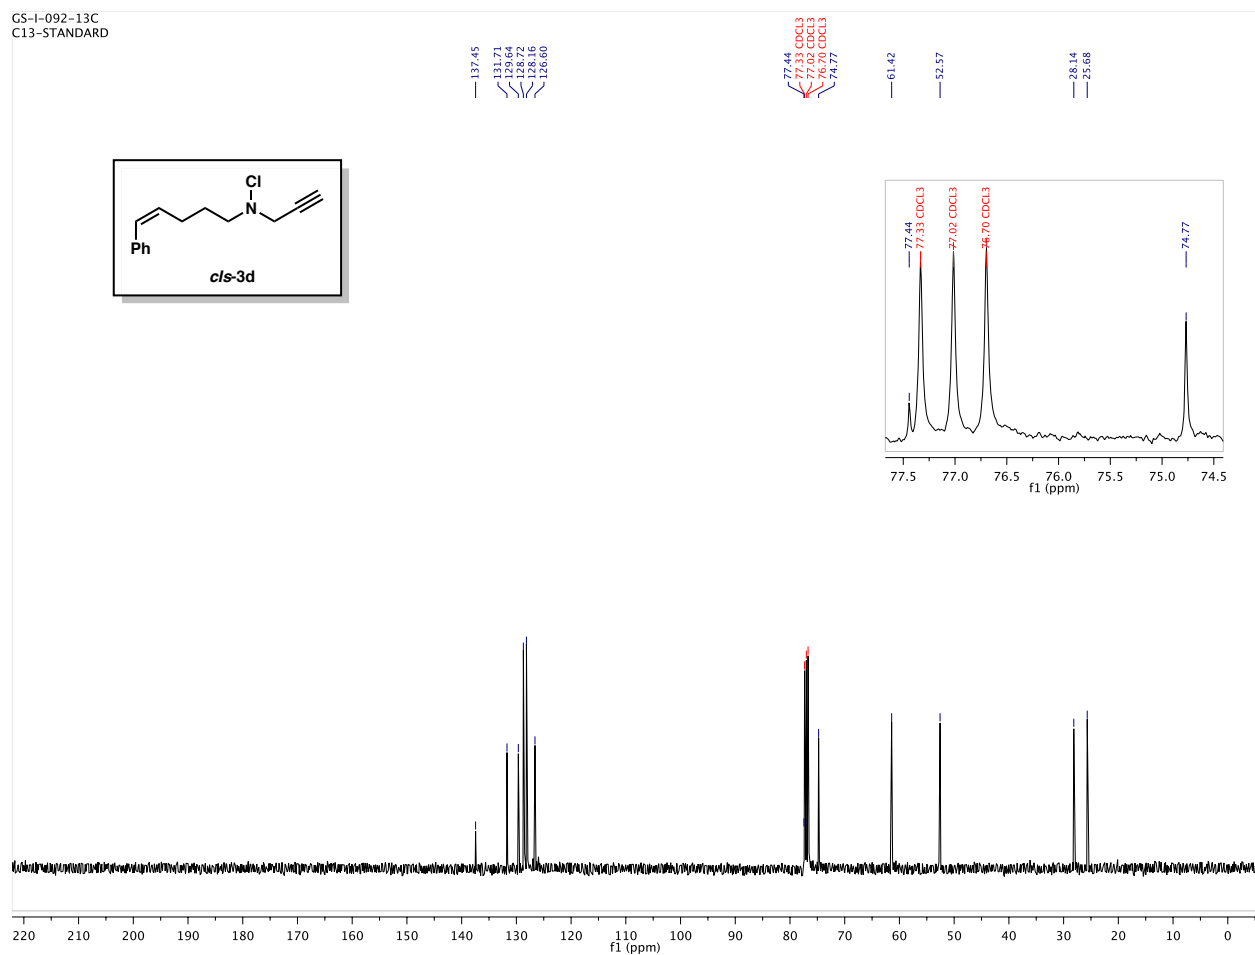



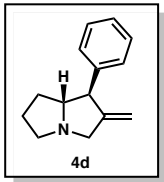

GS-I-095-13C-pure  
GS-I-095-13C-pure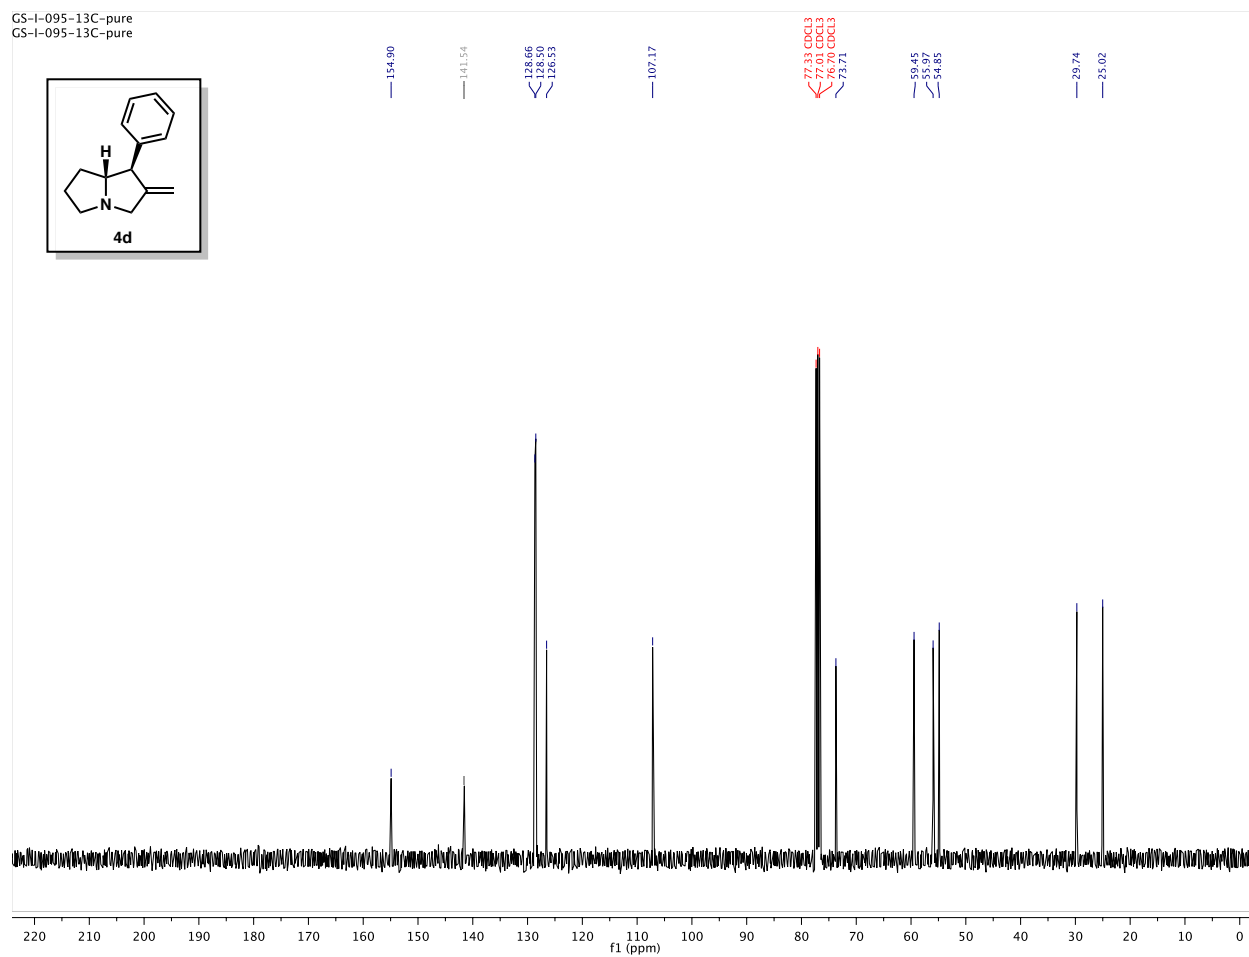

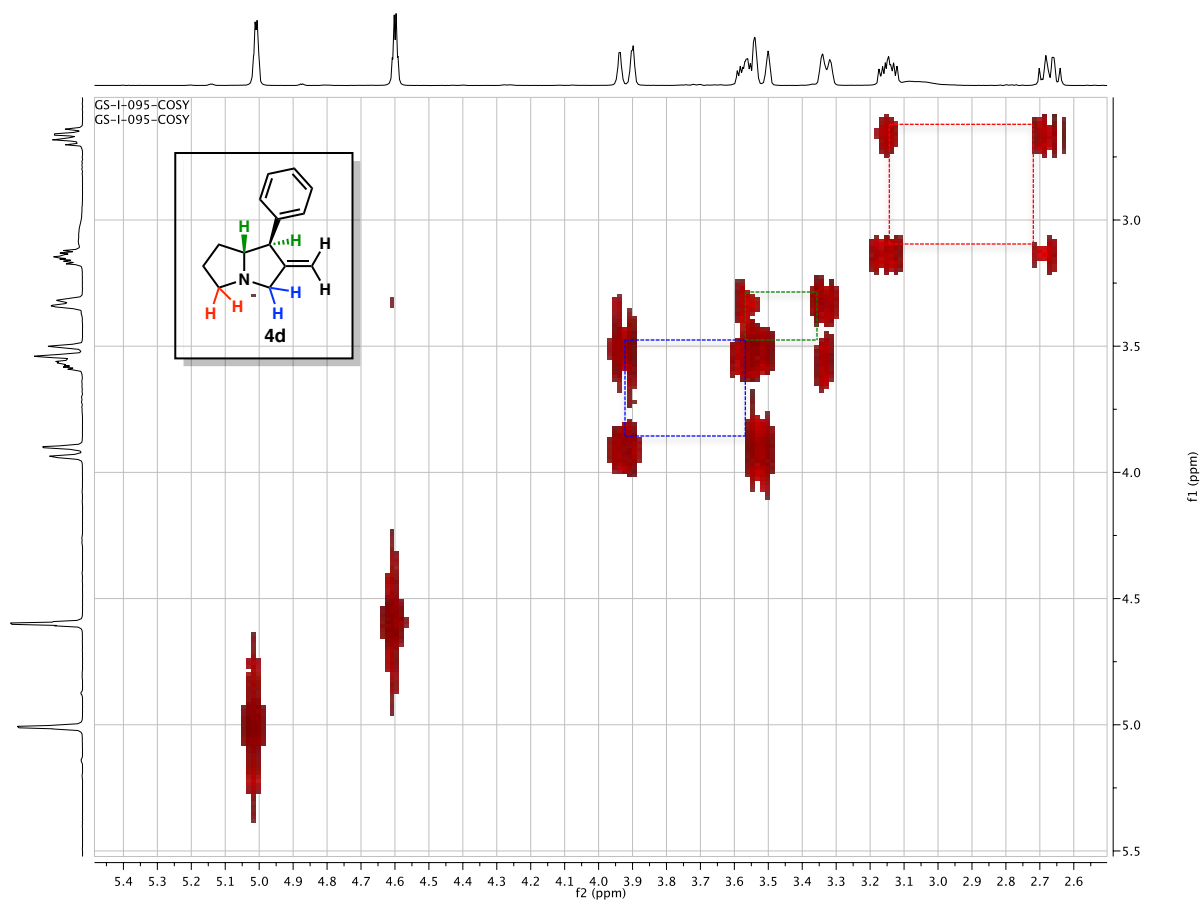

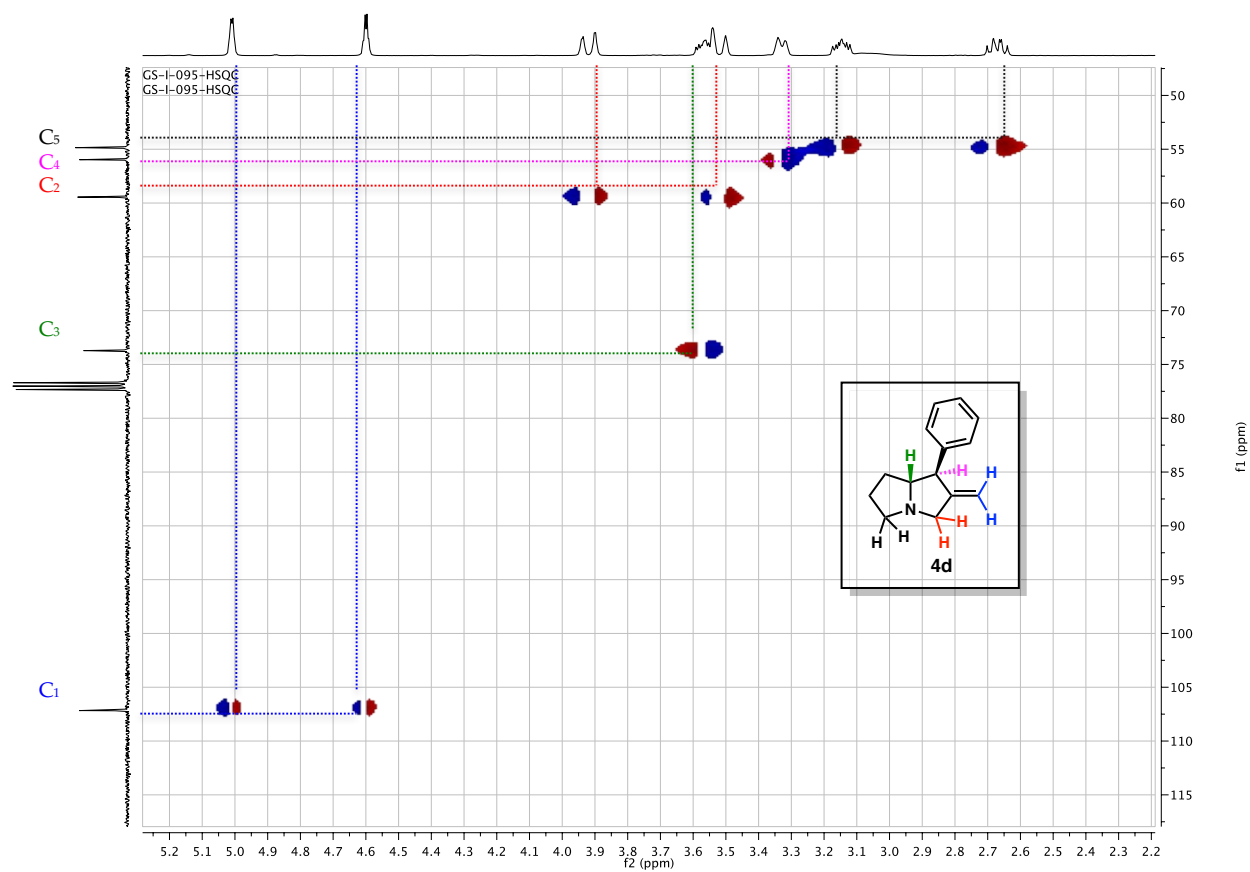

GS-I-095-NOE-3.57-1  
gradient 1d noe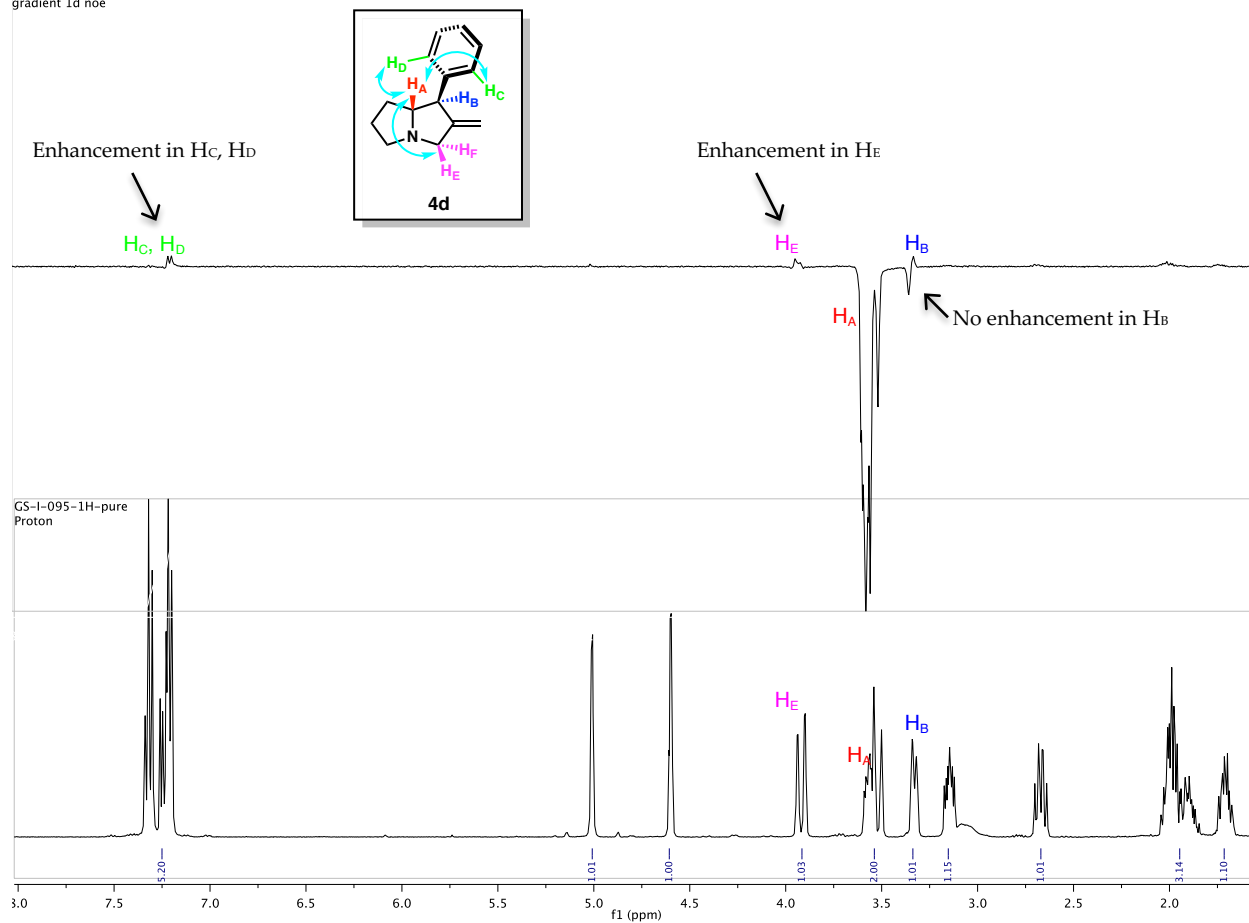

GS-I-095-NOE-3.3  
gradient 1d noe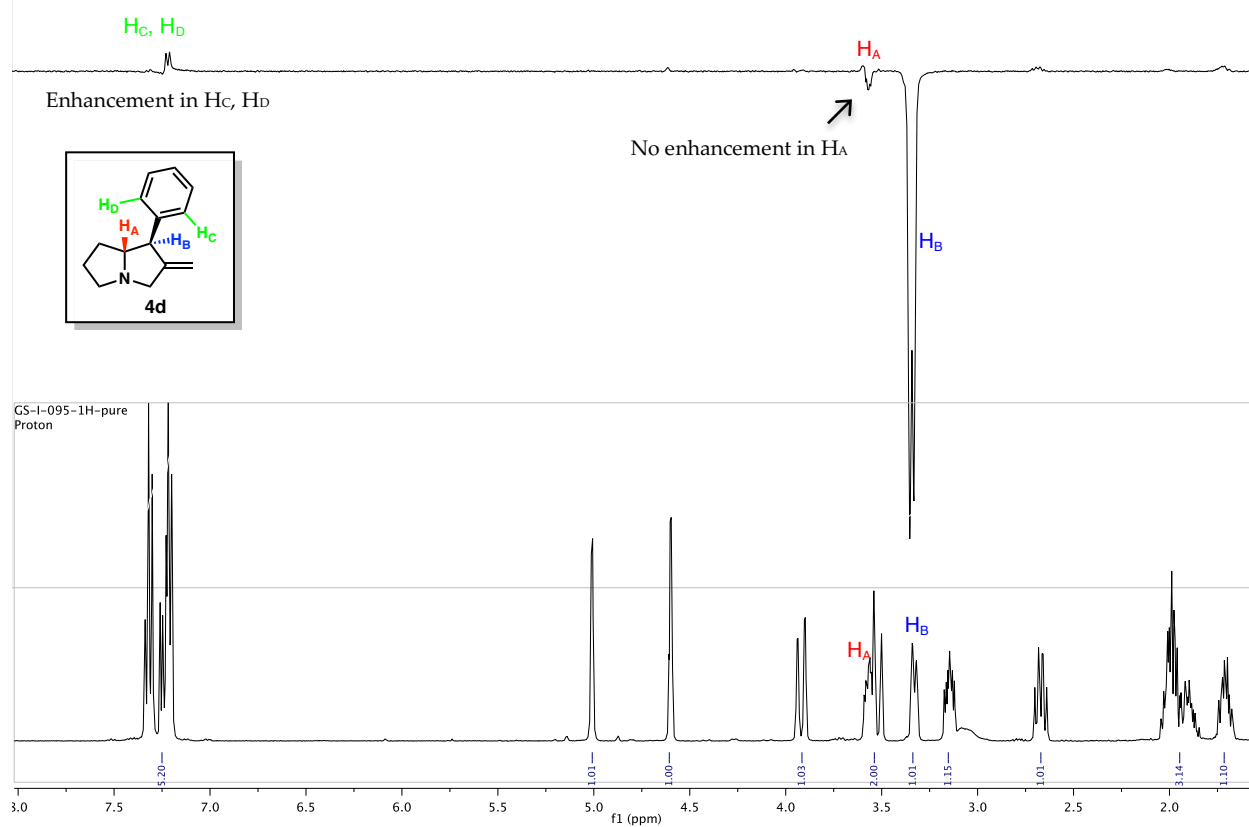

GS-I-013-1H  
Proton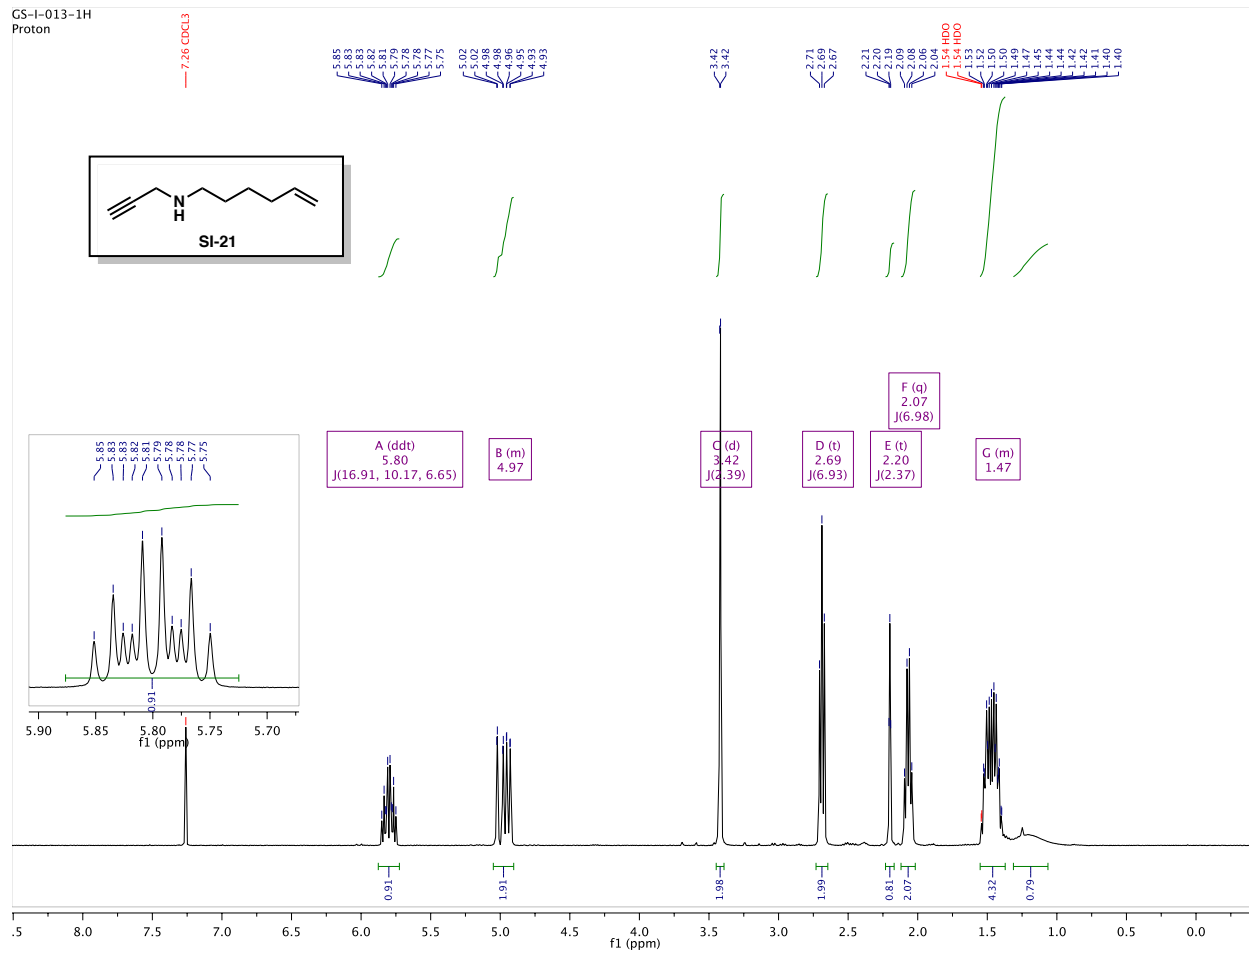

GS-I-013-13C  
C13-STANDARD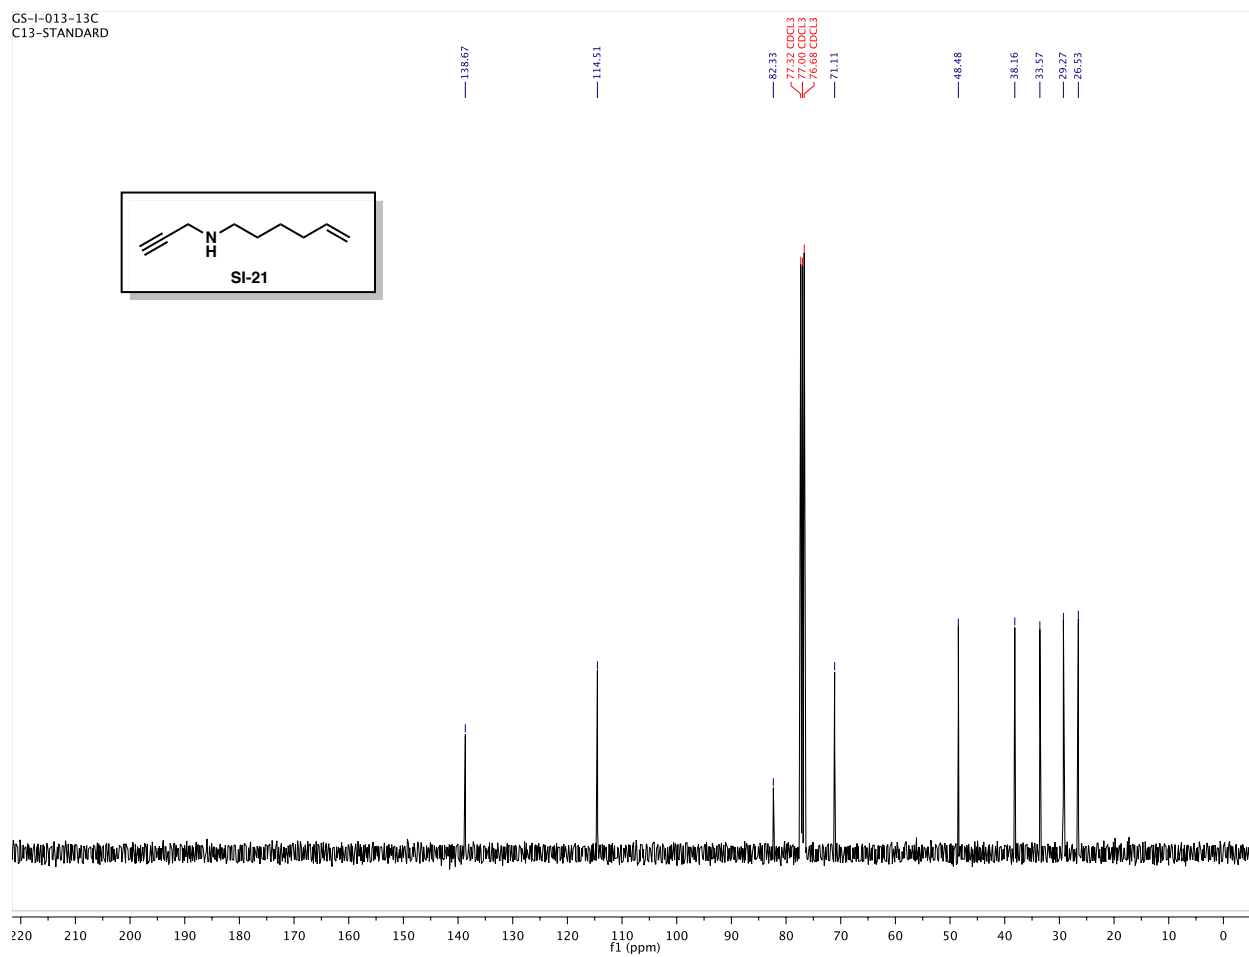



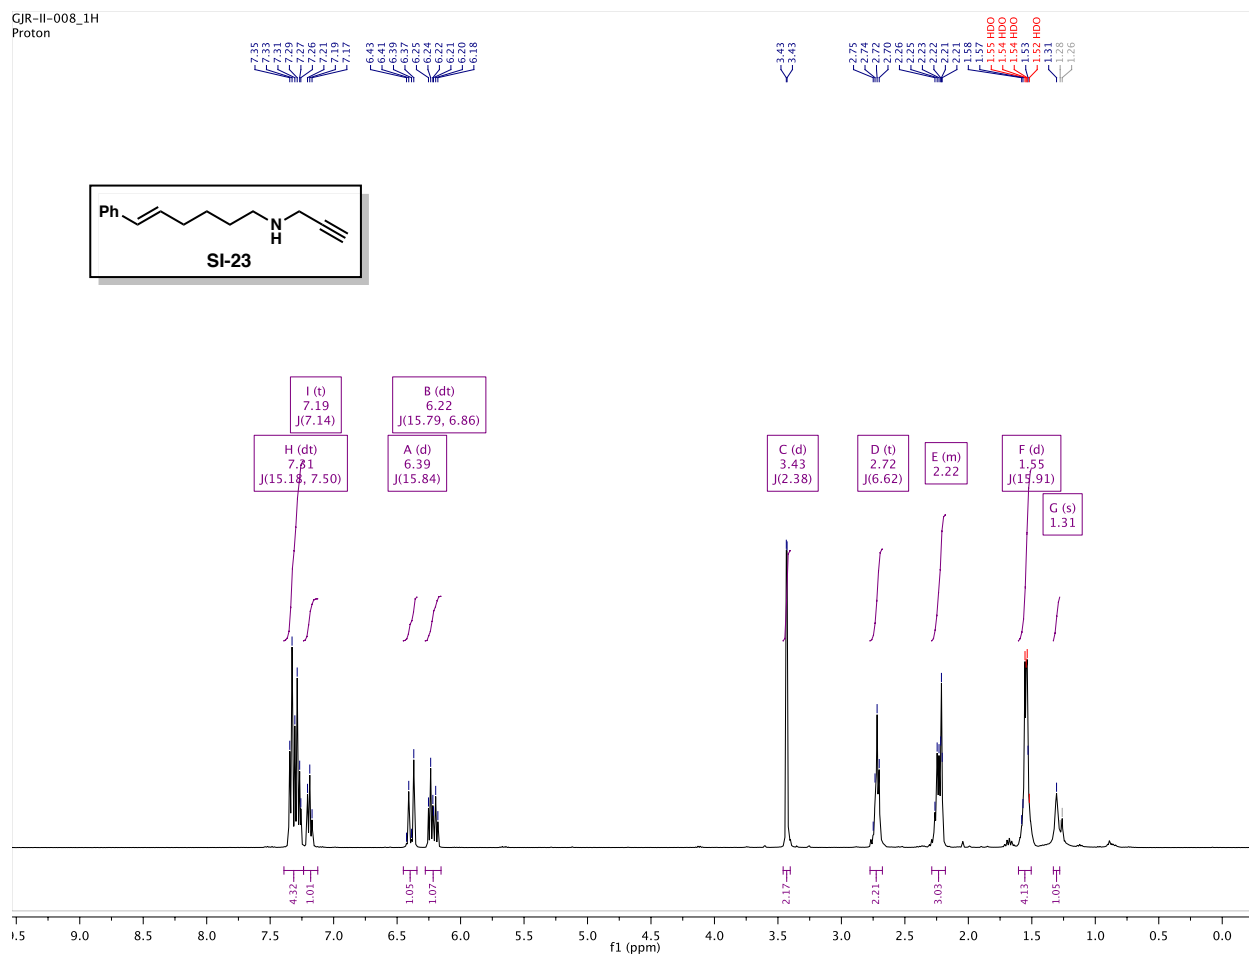

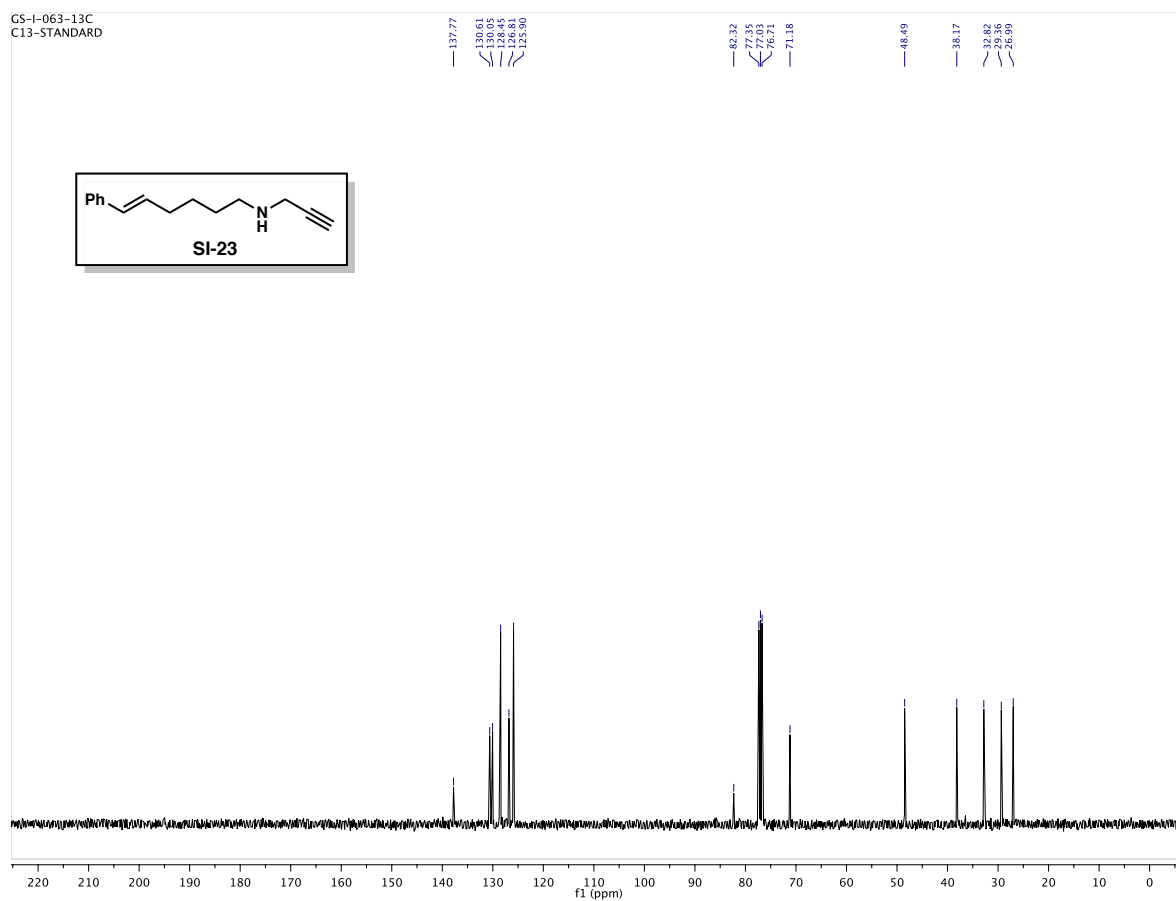

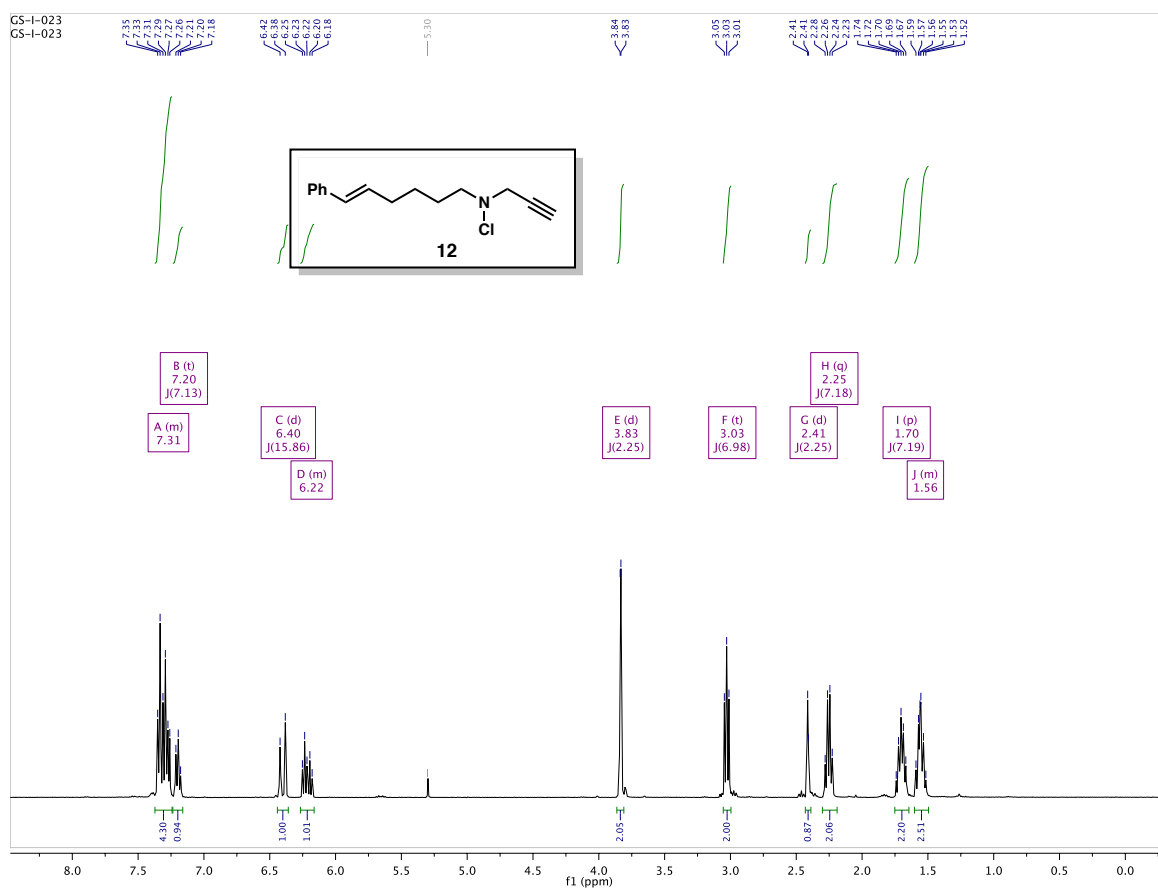

GS-I-023-13c  
C13-STANDARD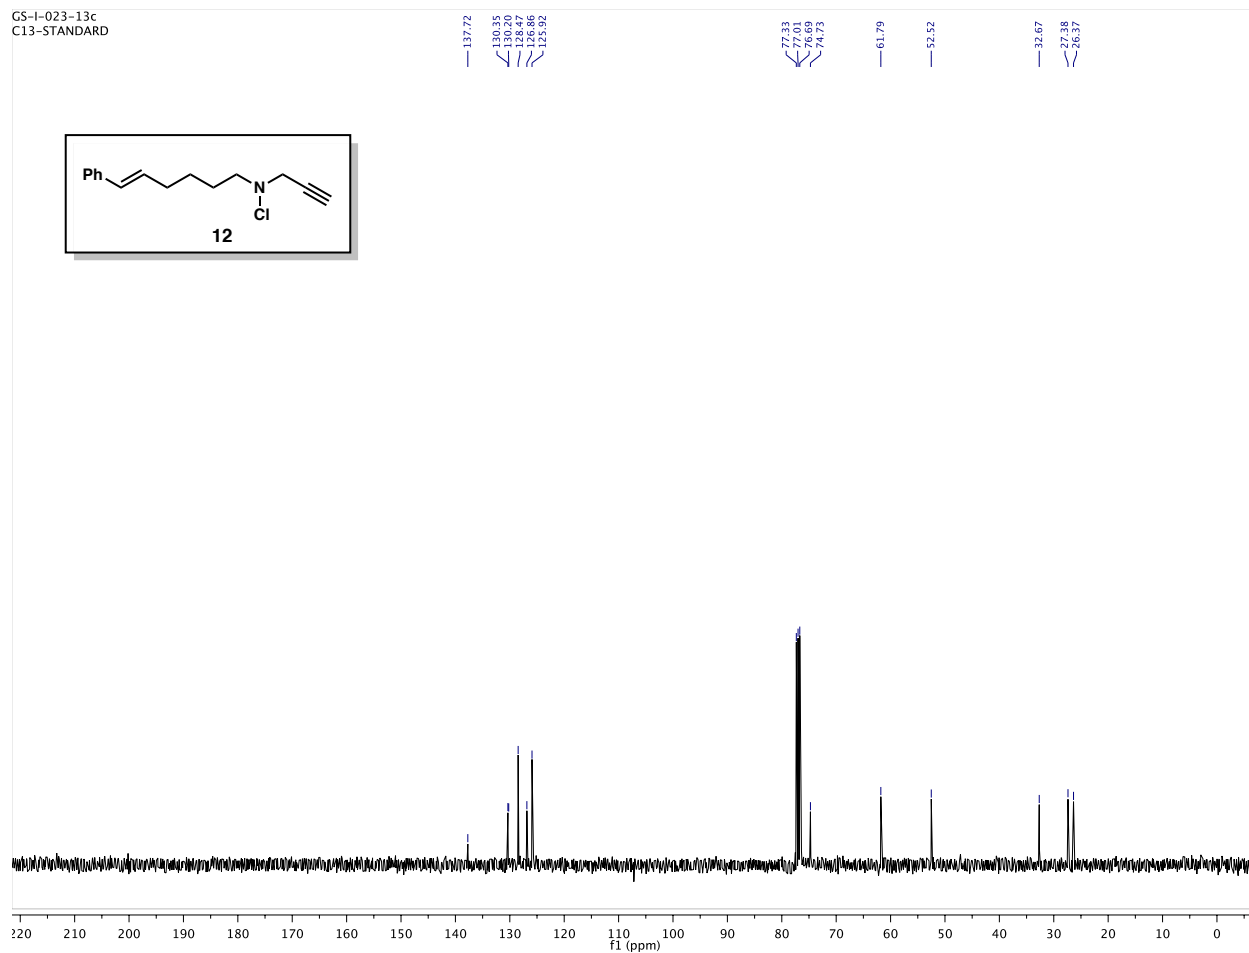

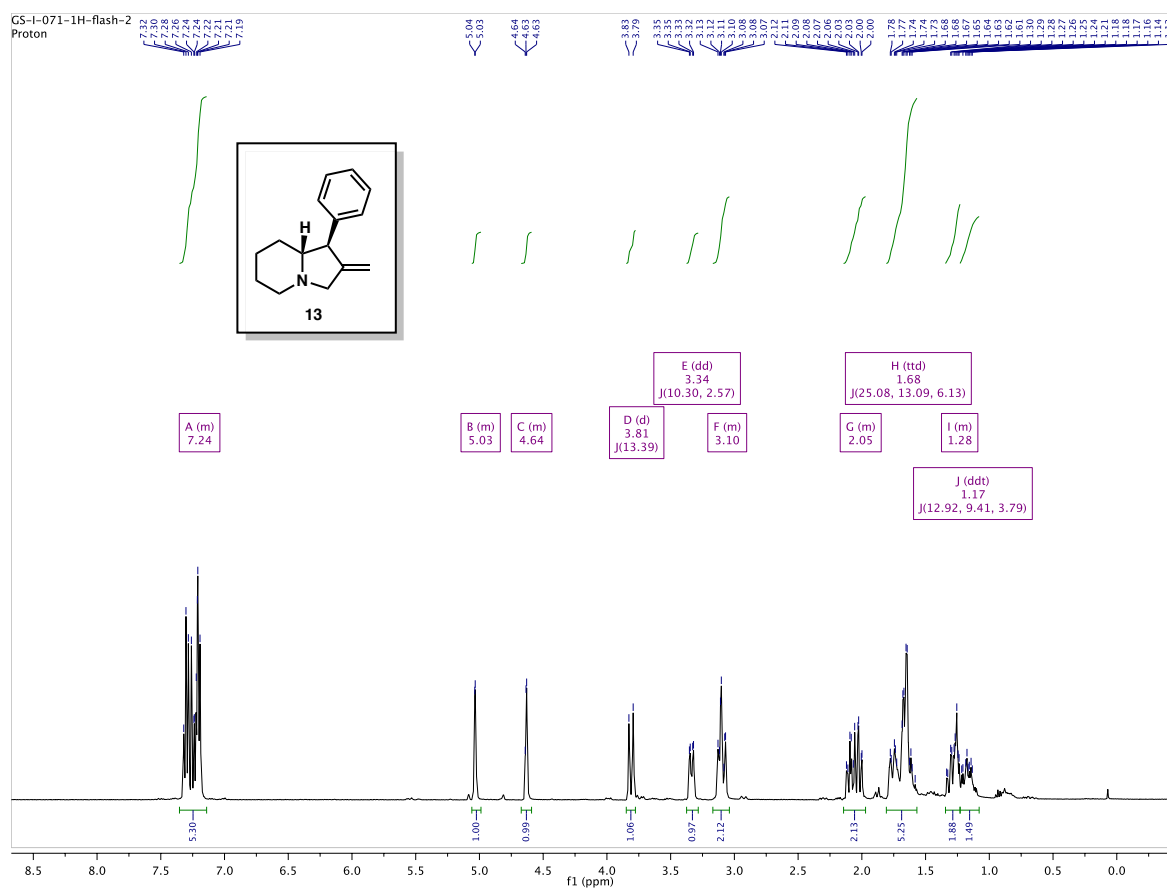

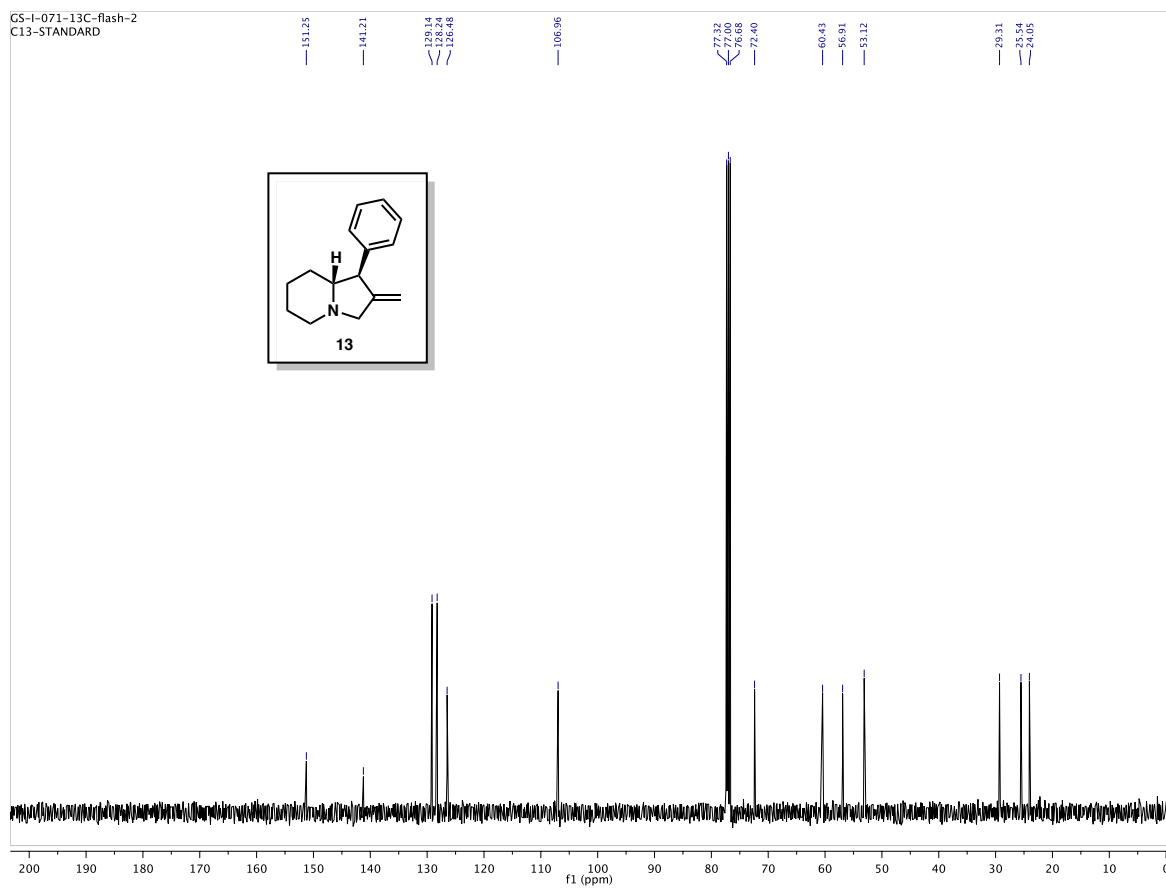

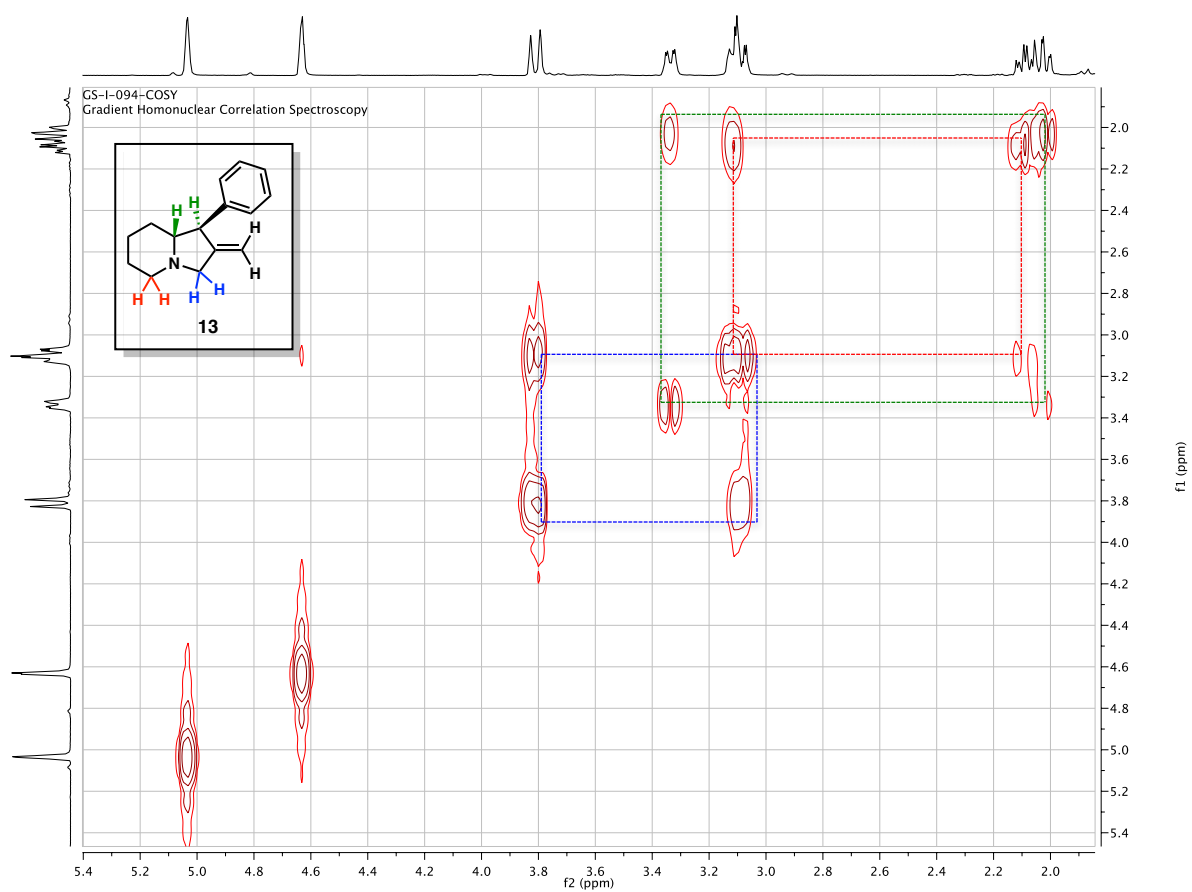

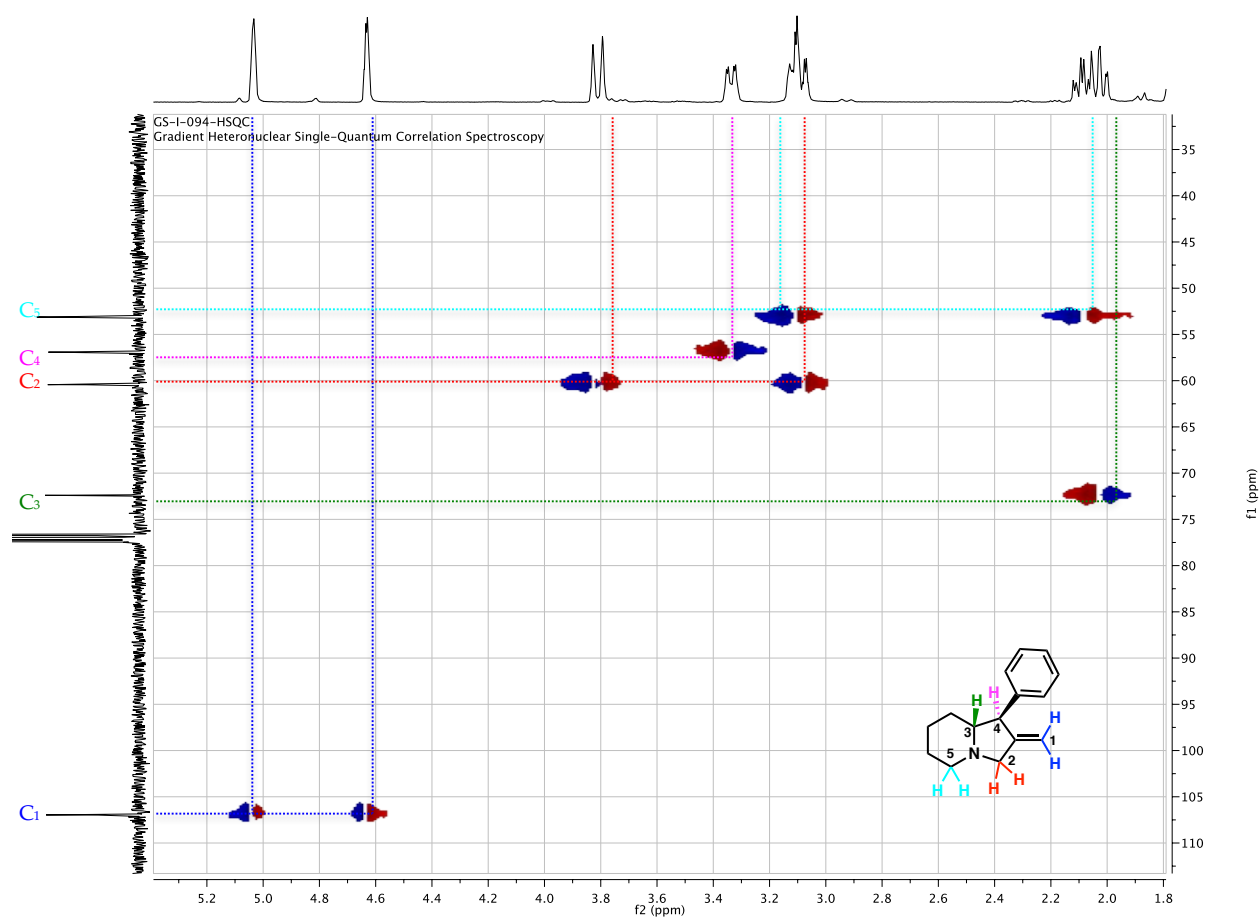



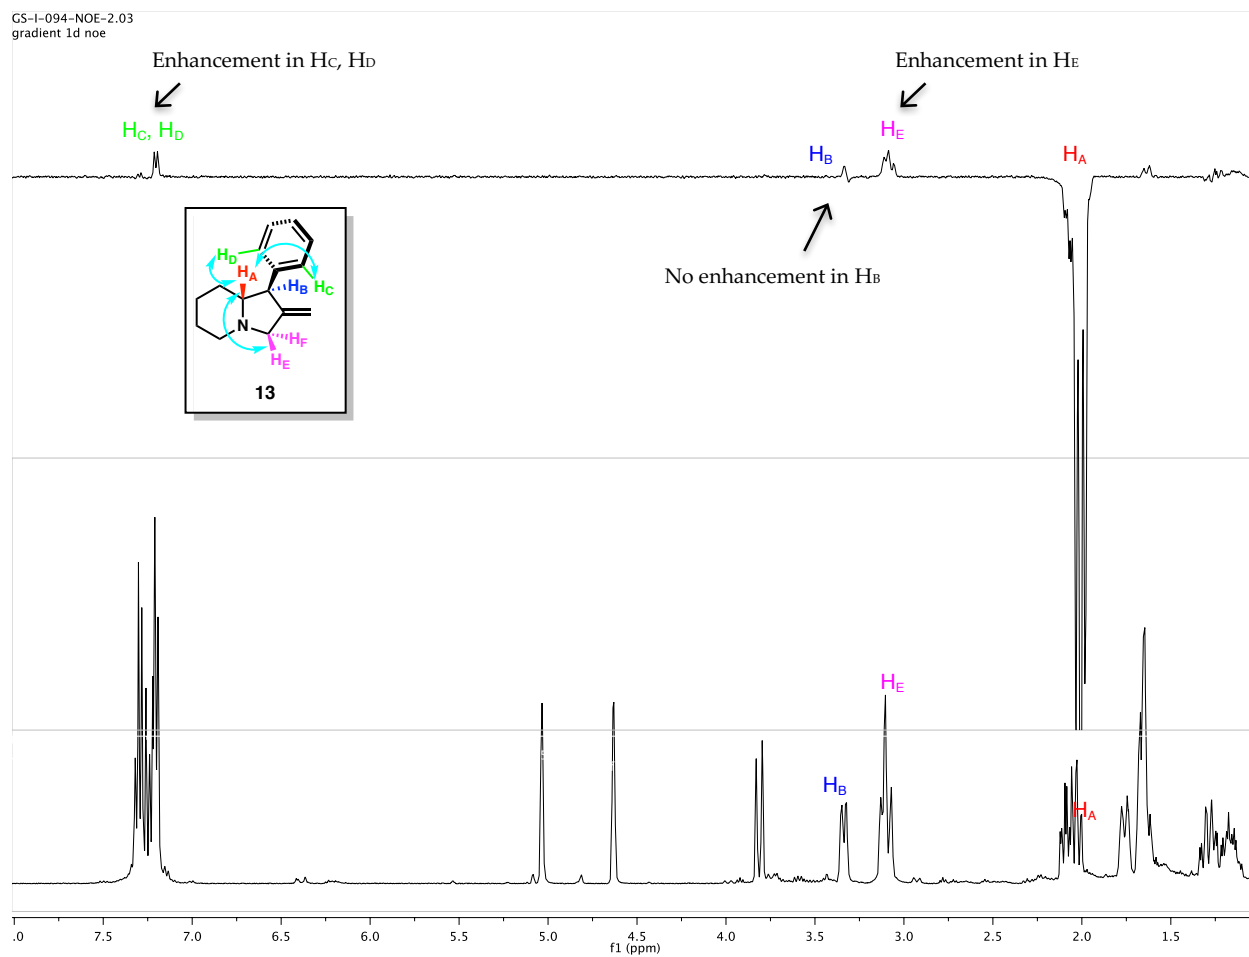

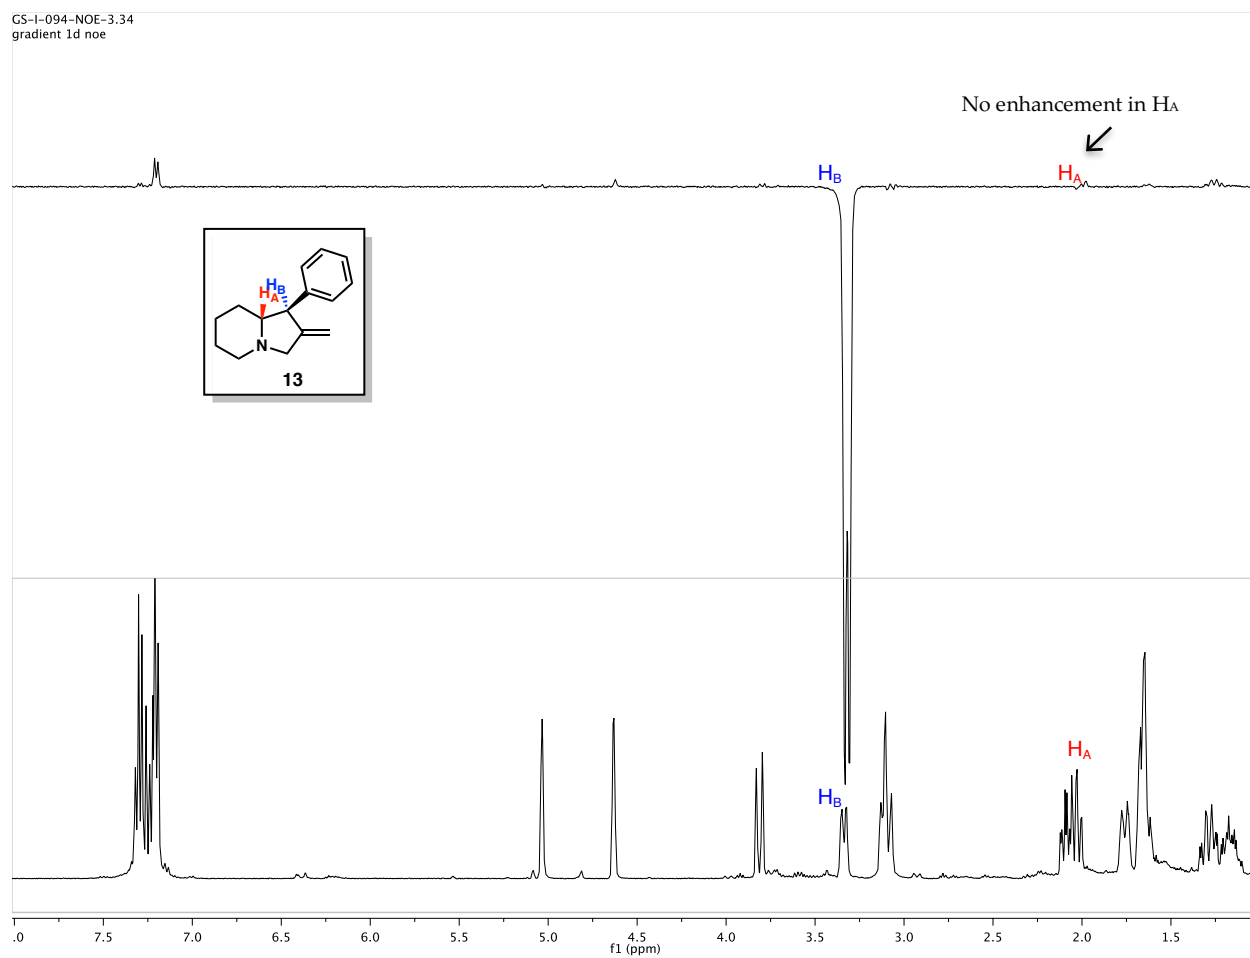

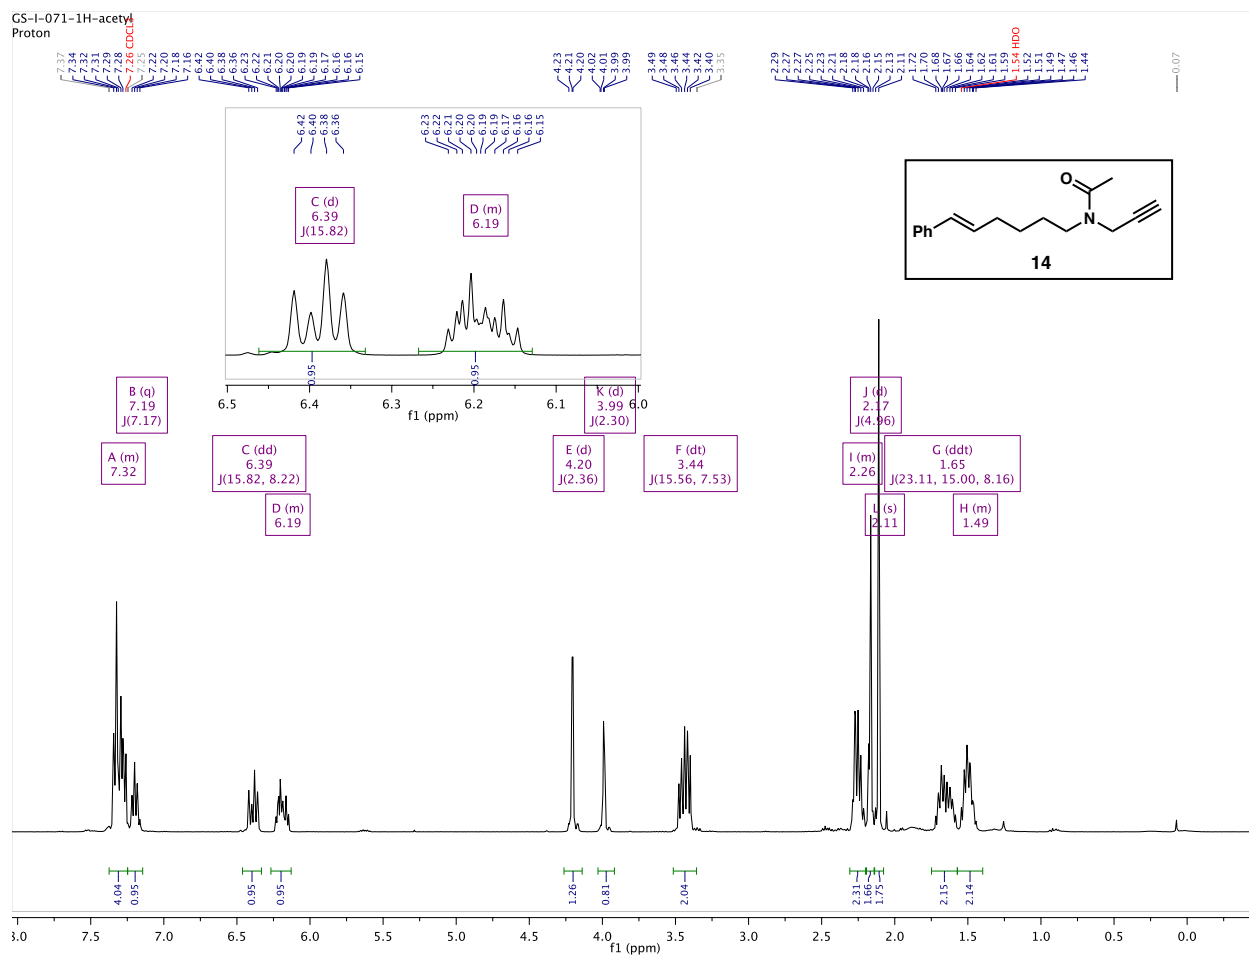

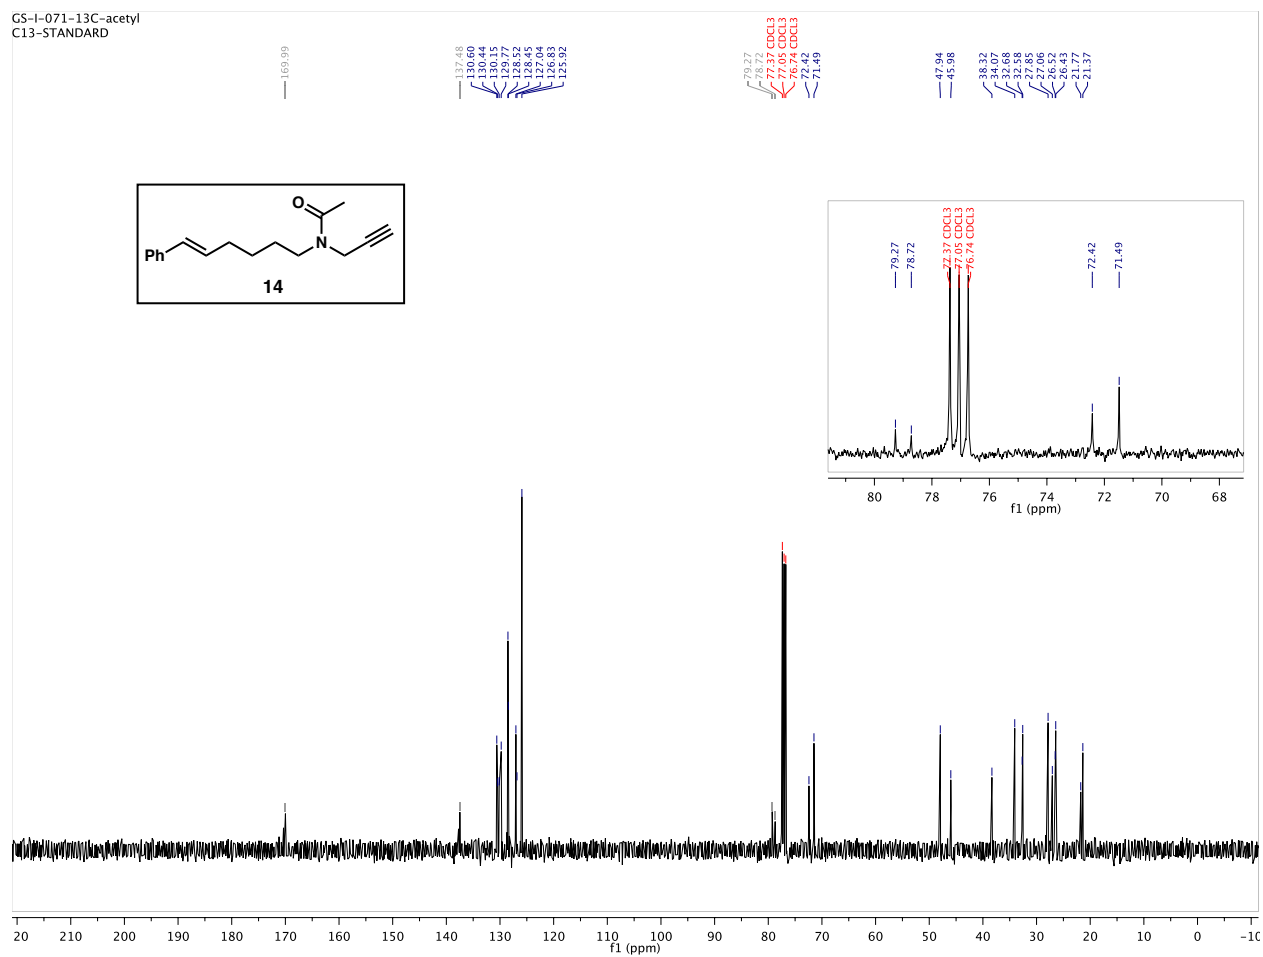

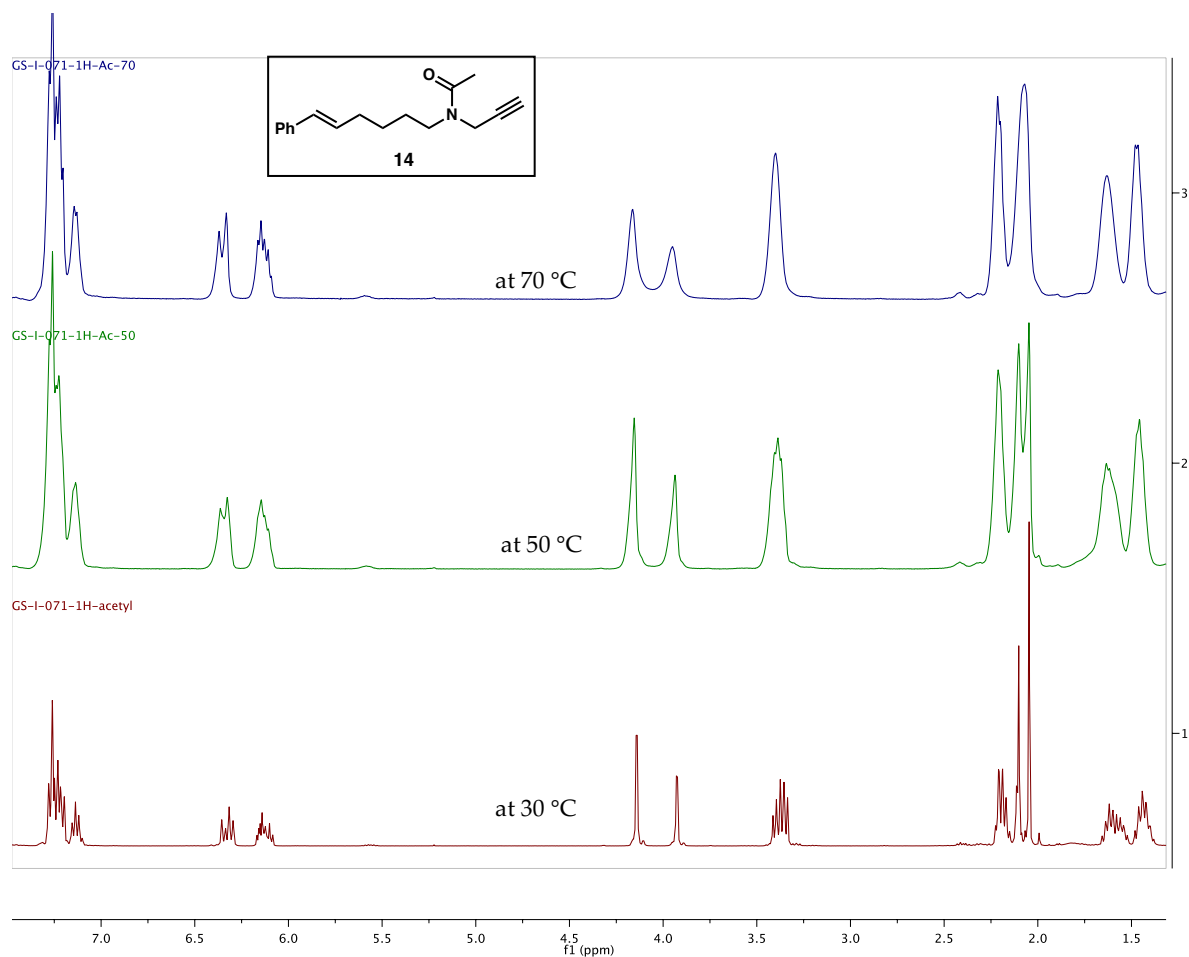Variable temperature <sup>1</sup>H-NMR of compound 14

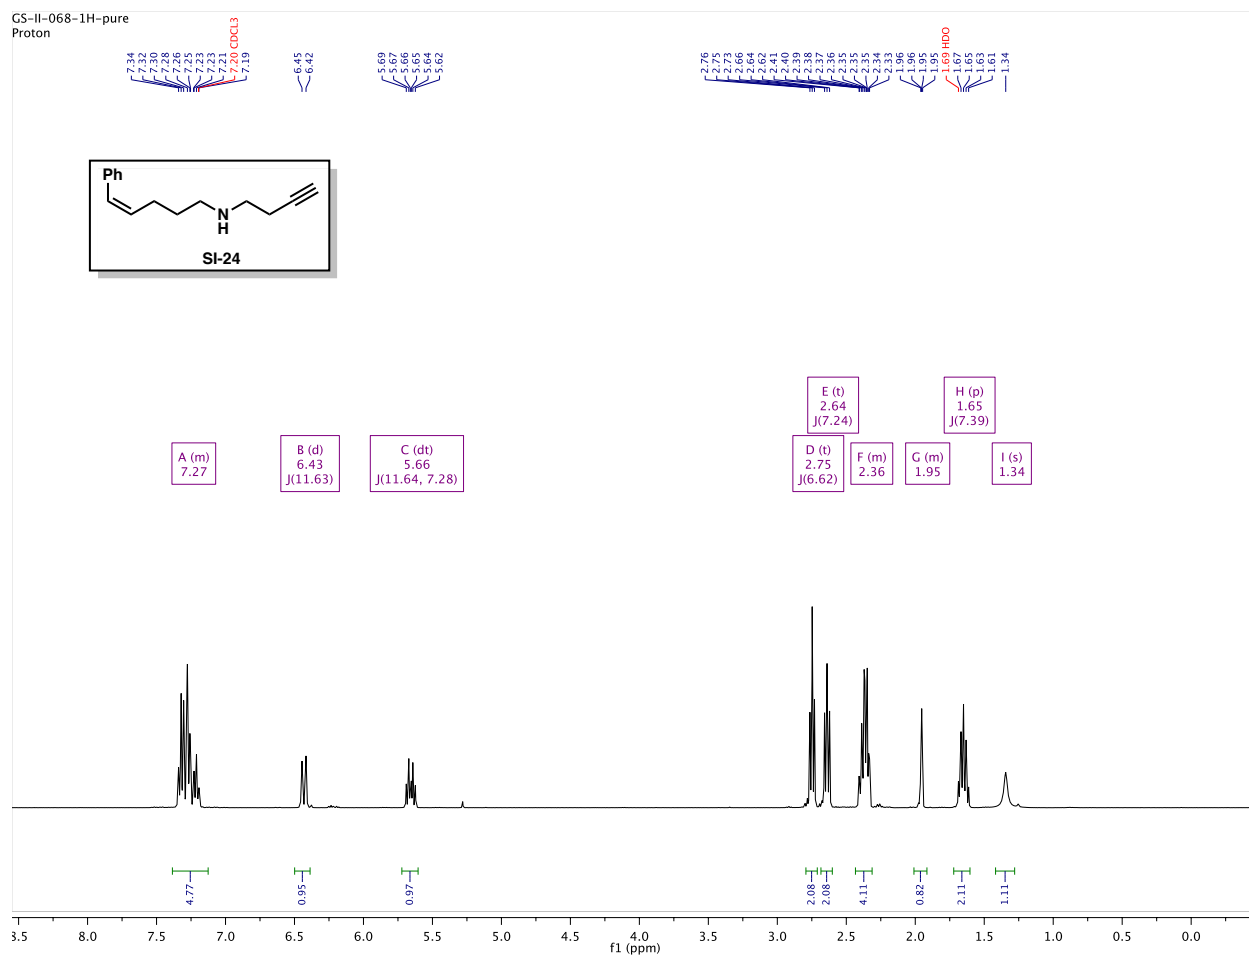

GS-II-068-13C-pure  
GS-II-068-13C-pure

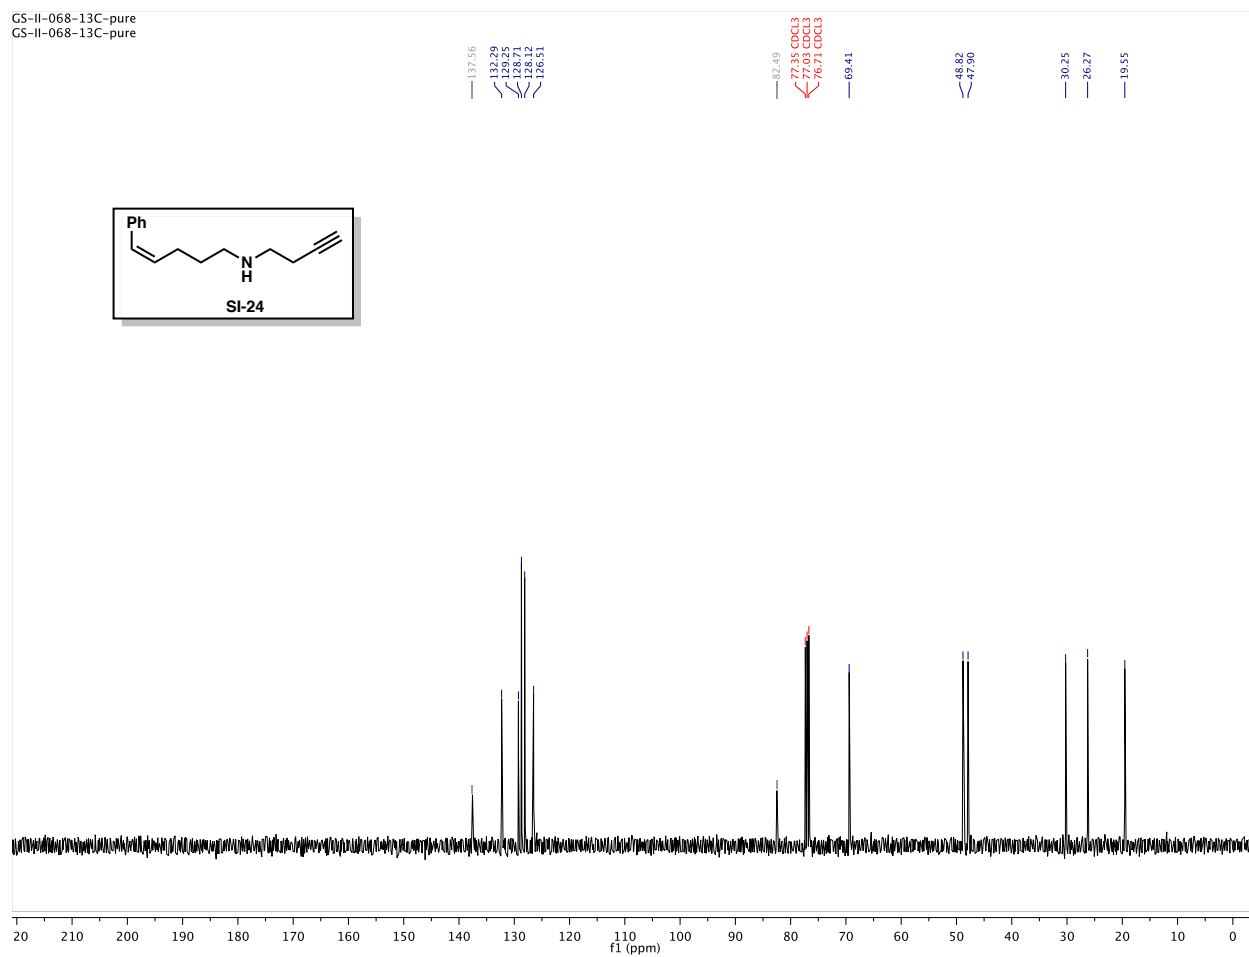

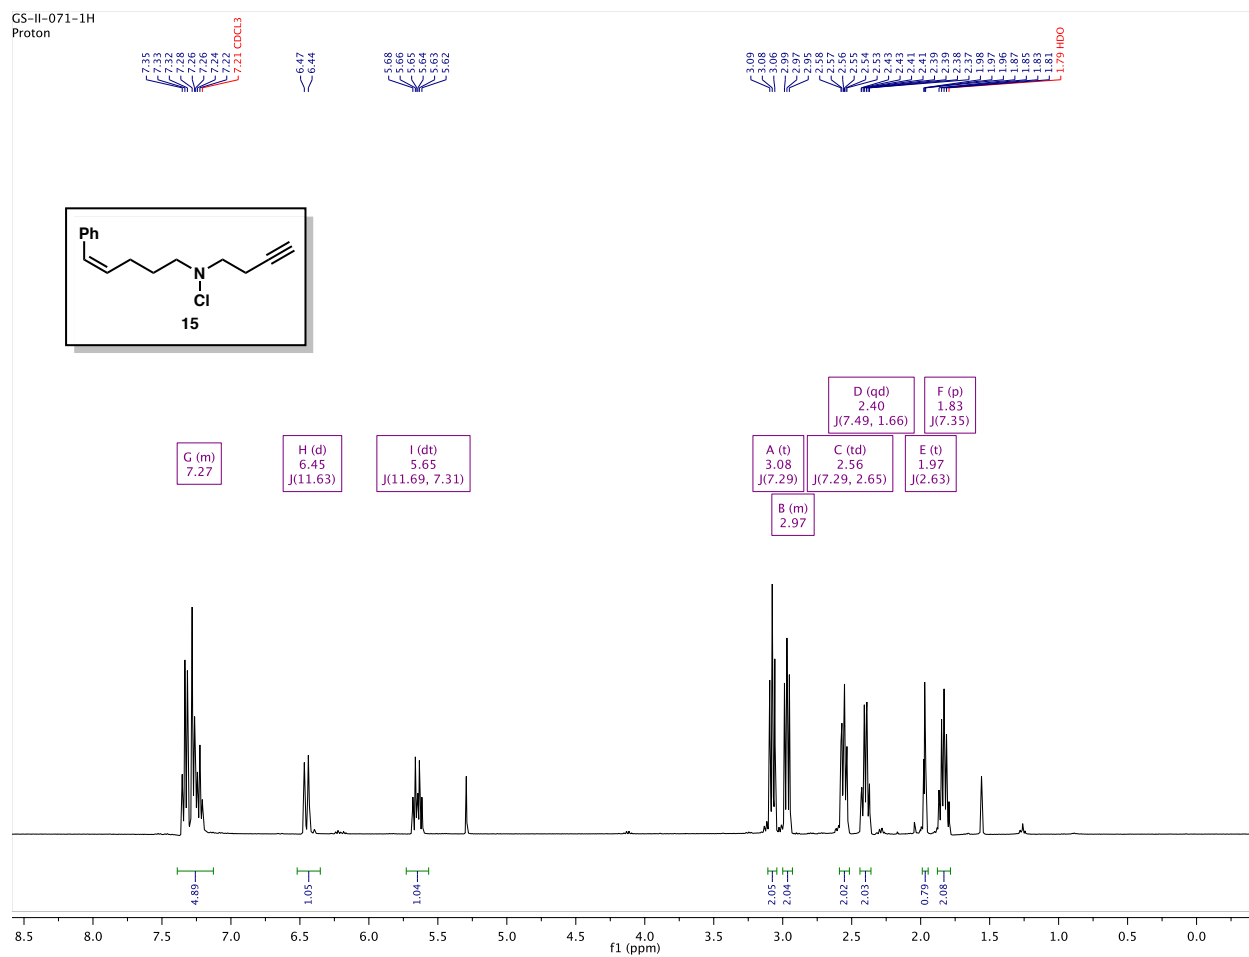



GS-II-071-13C  
C13-STANDARD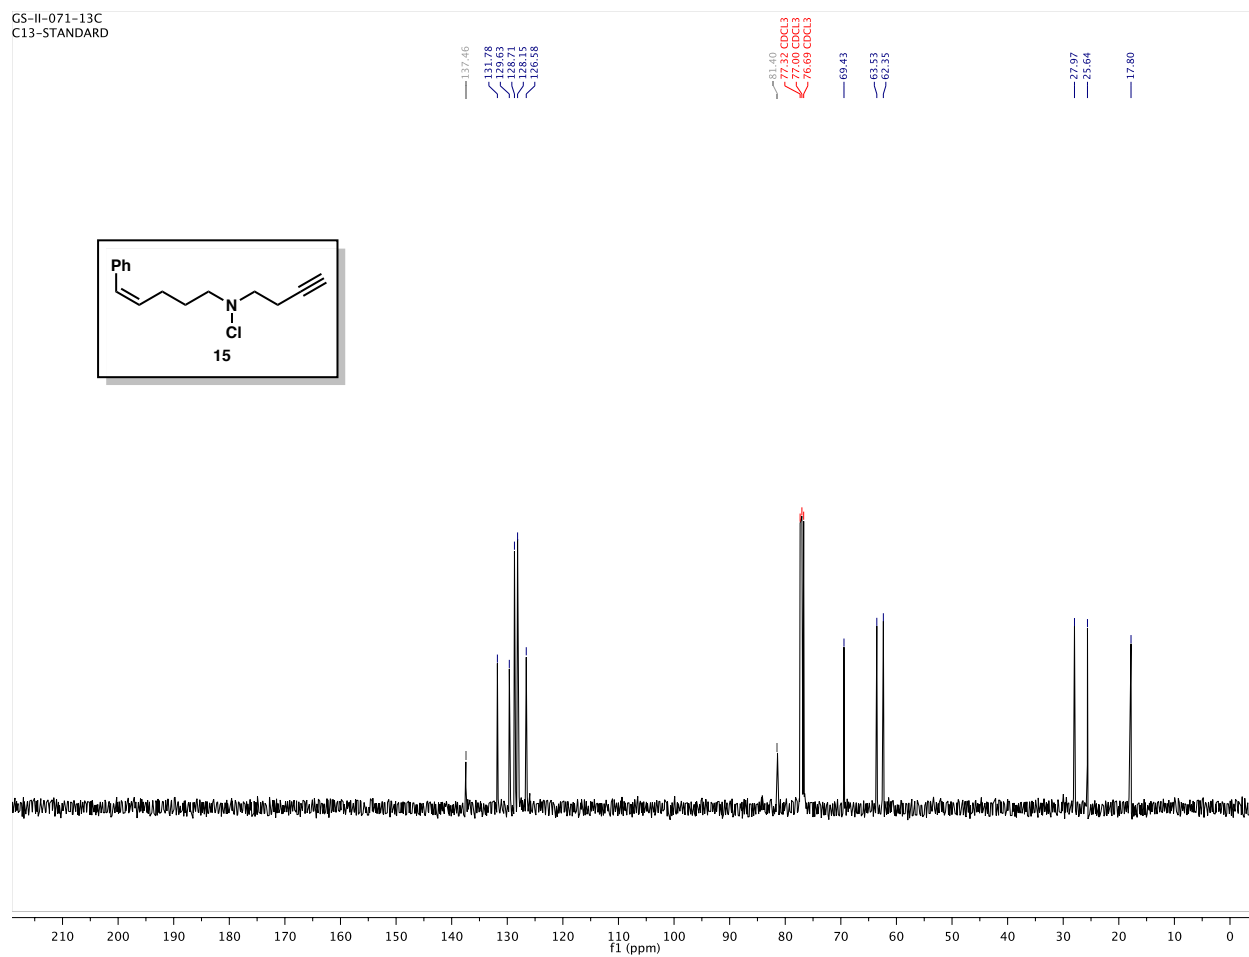

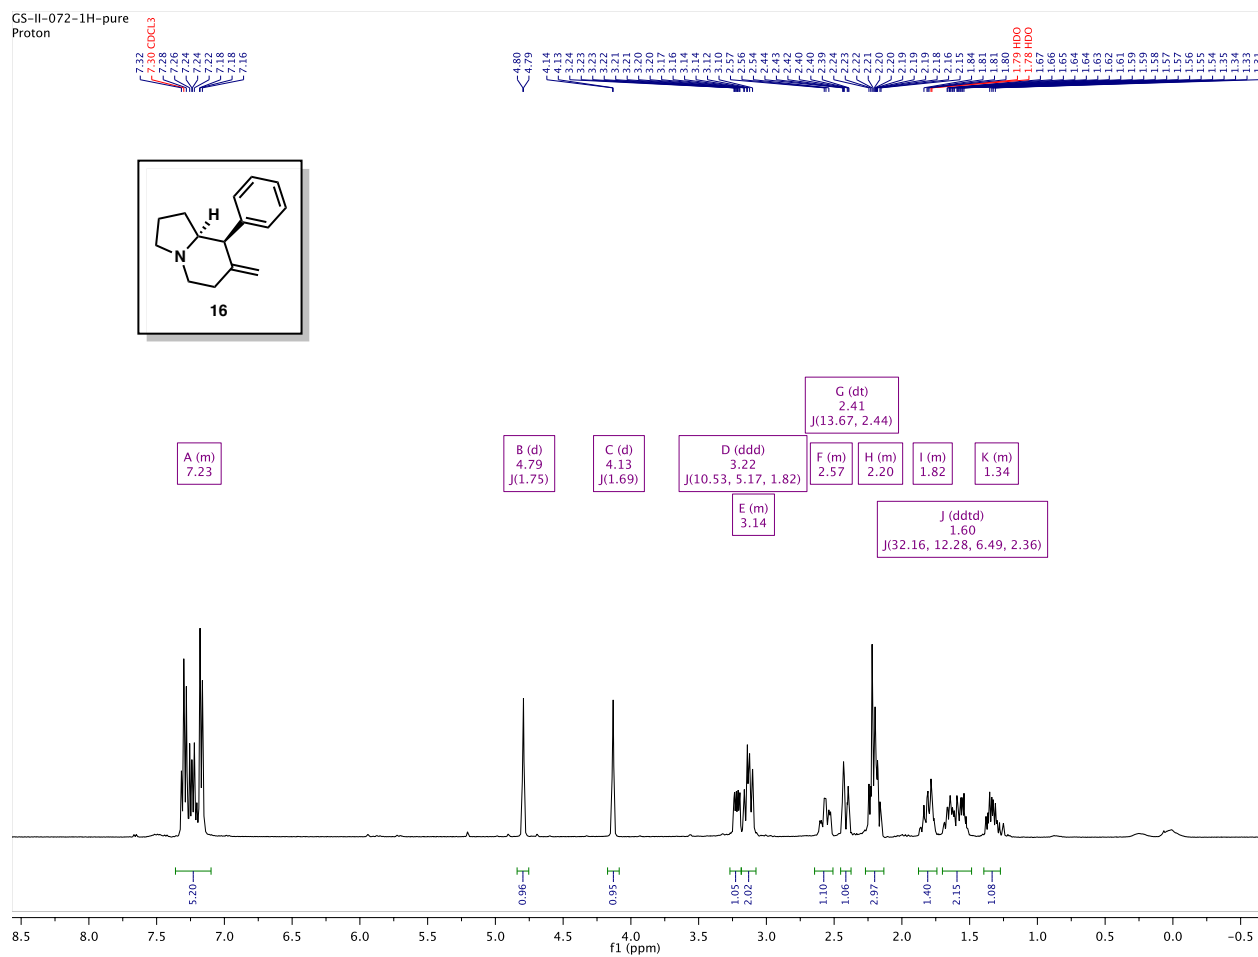

GS-II-072-13C-pure  
C13-STANDARD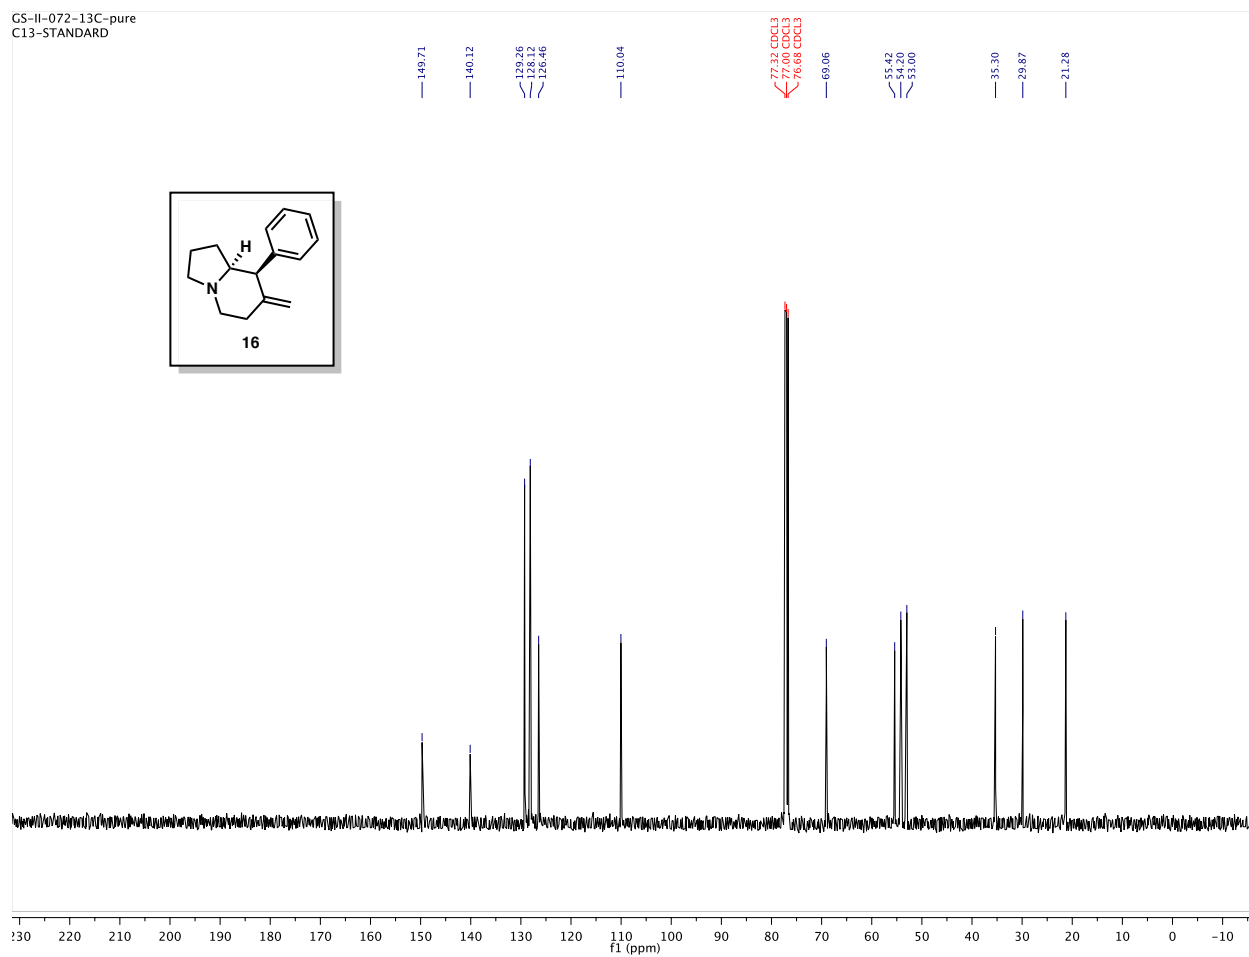

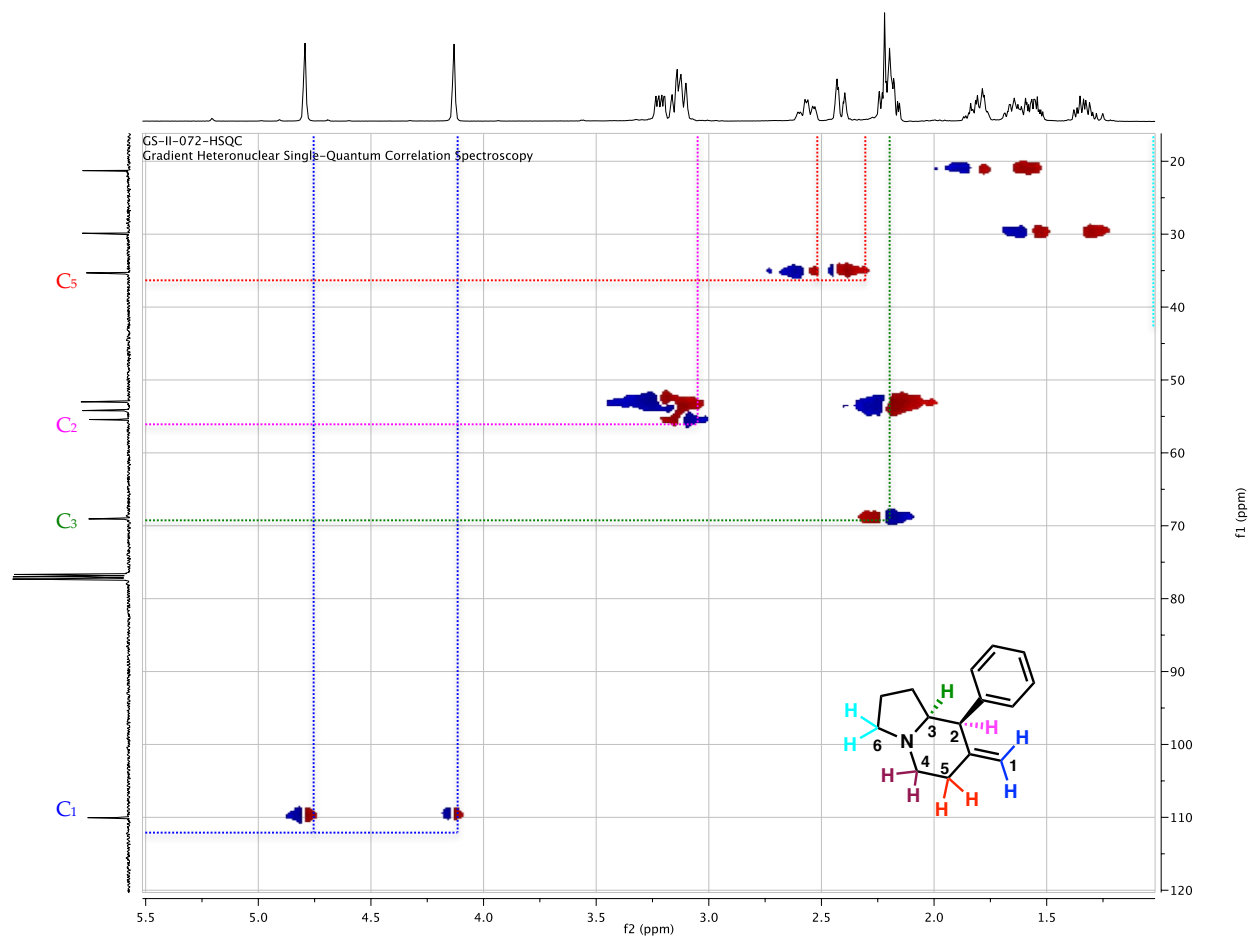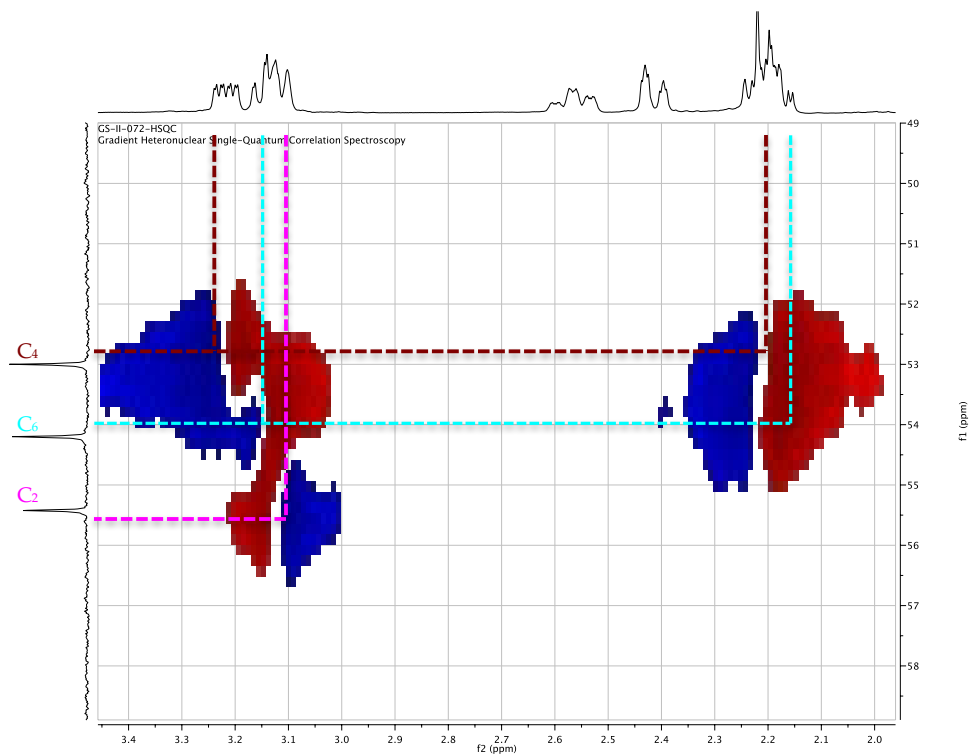

GS-II-072-NOE-2.22  
gradient 1d noe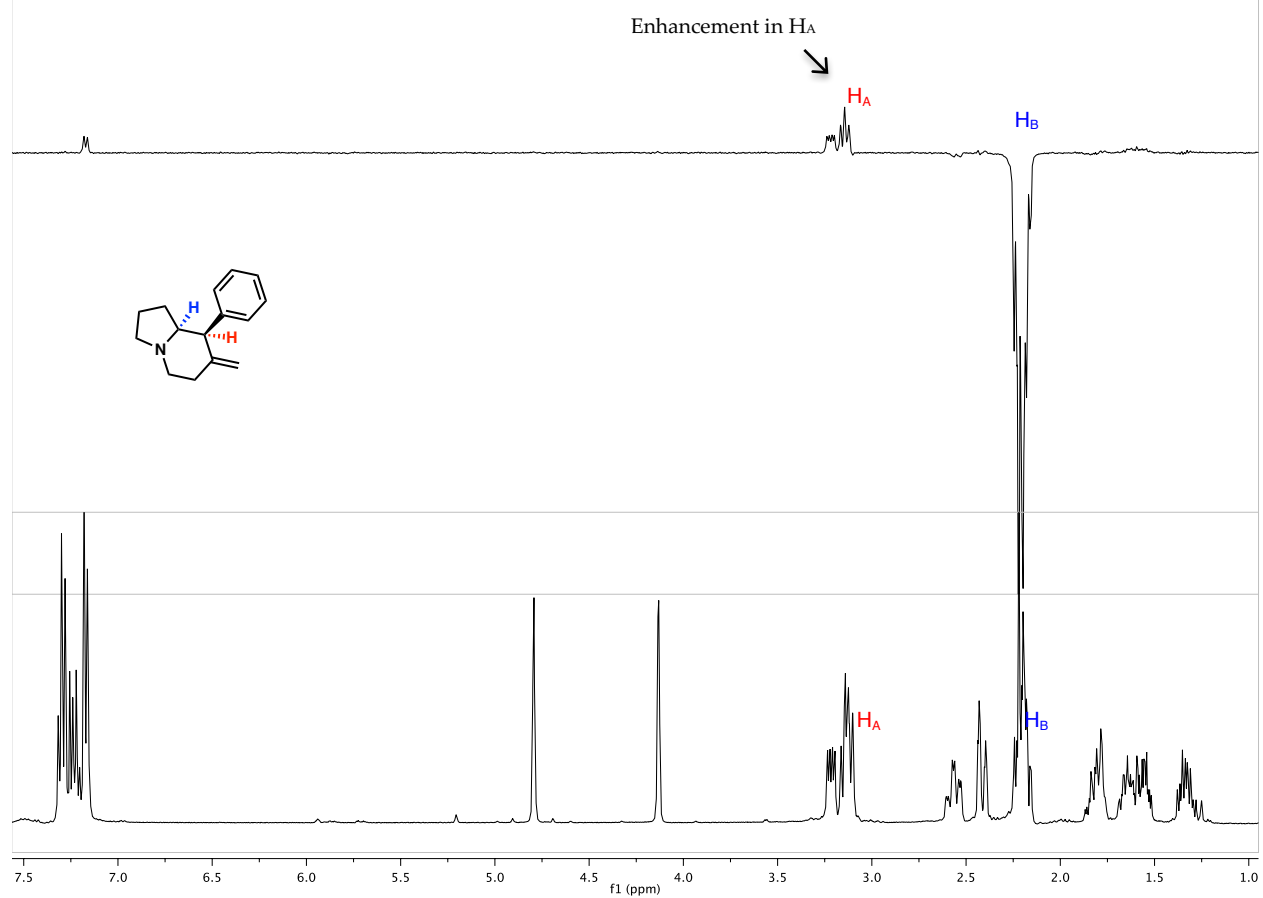

GS-II-072-NOE-3.12  
gradient 1d noe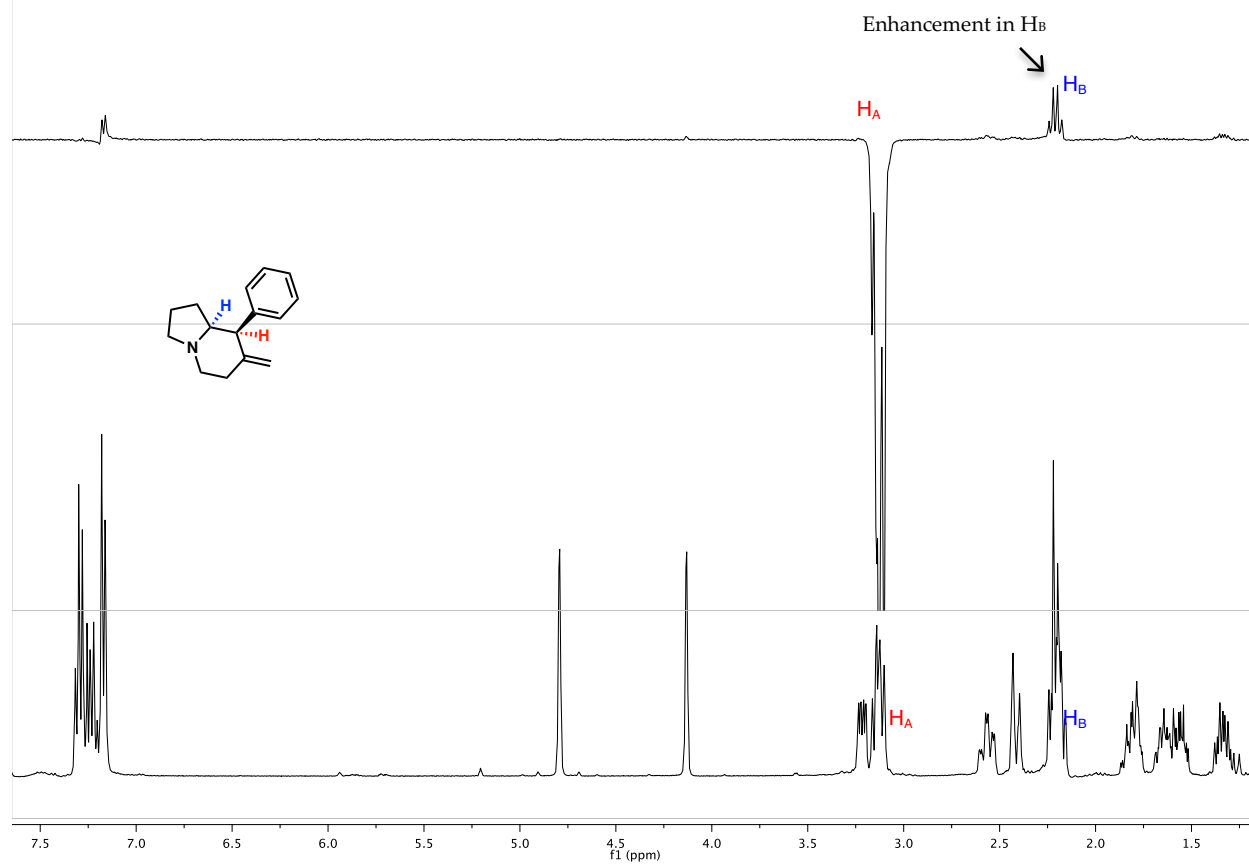

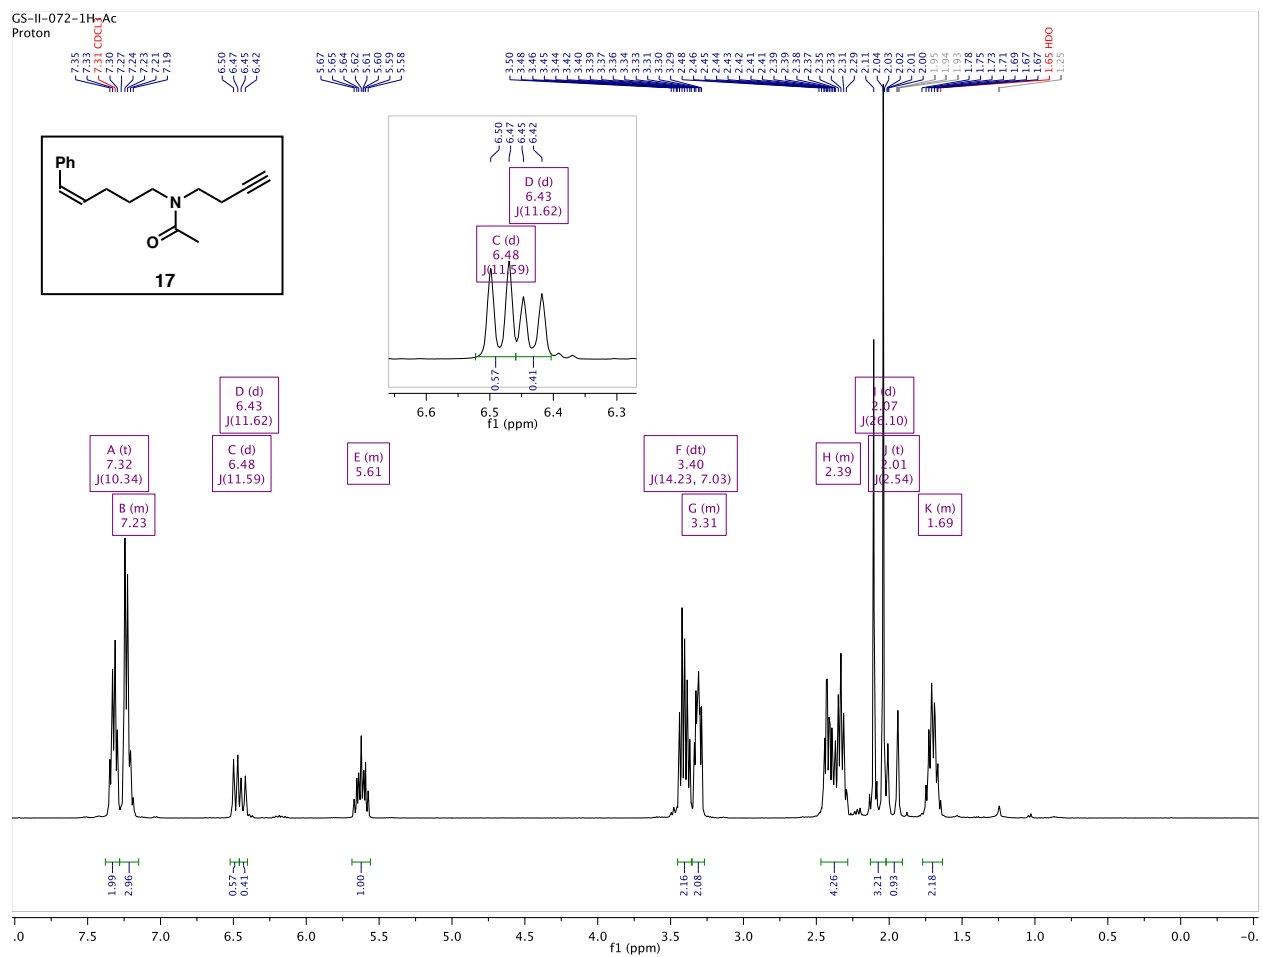

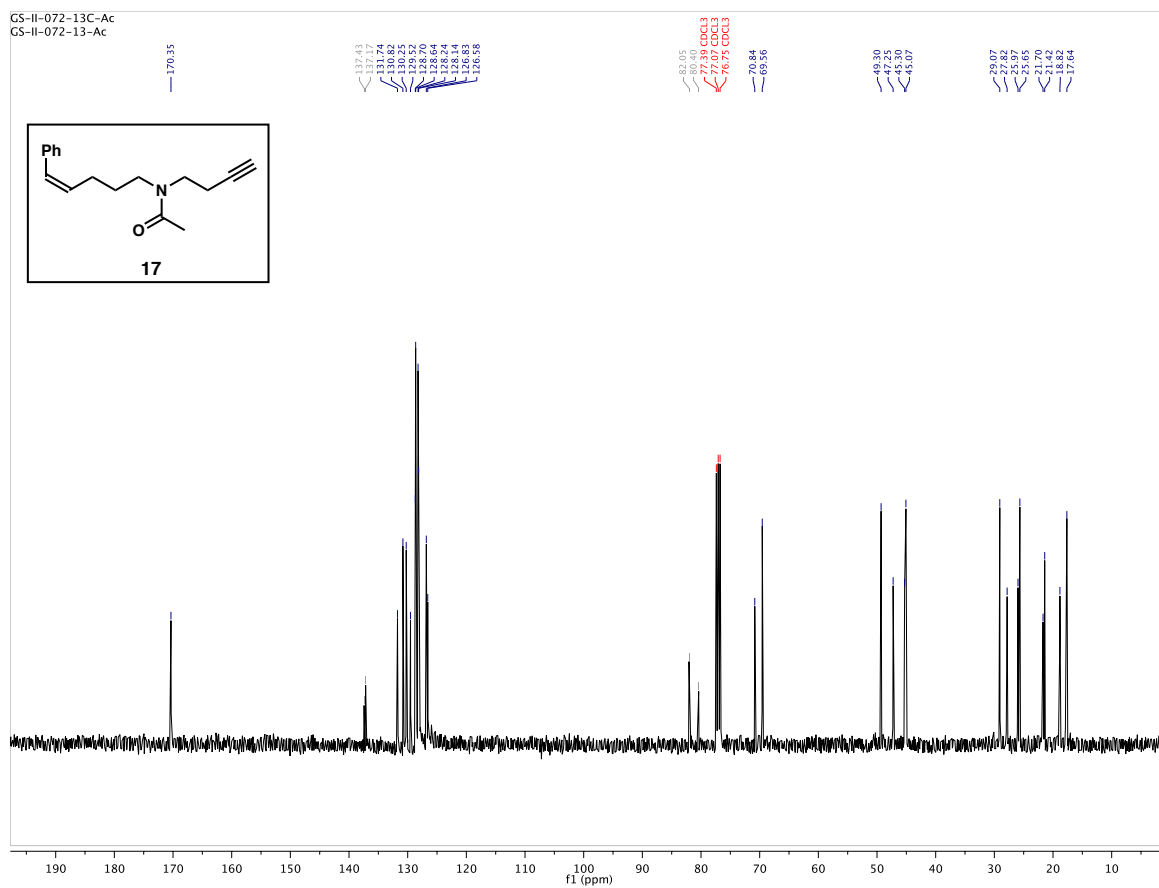



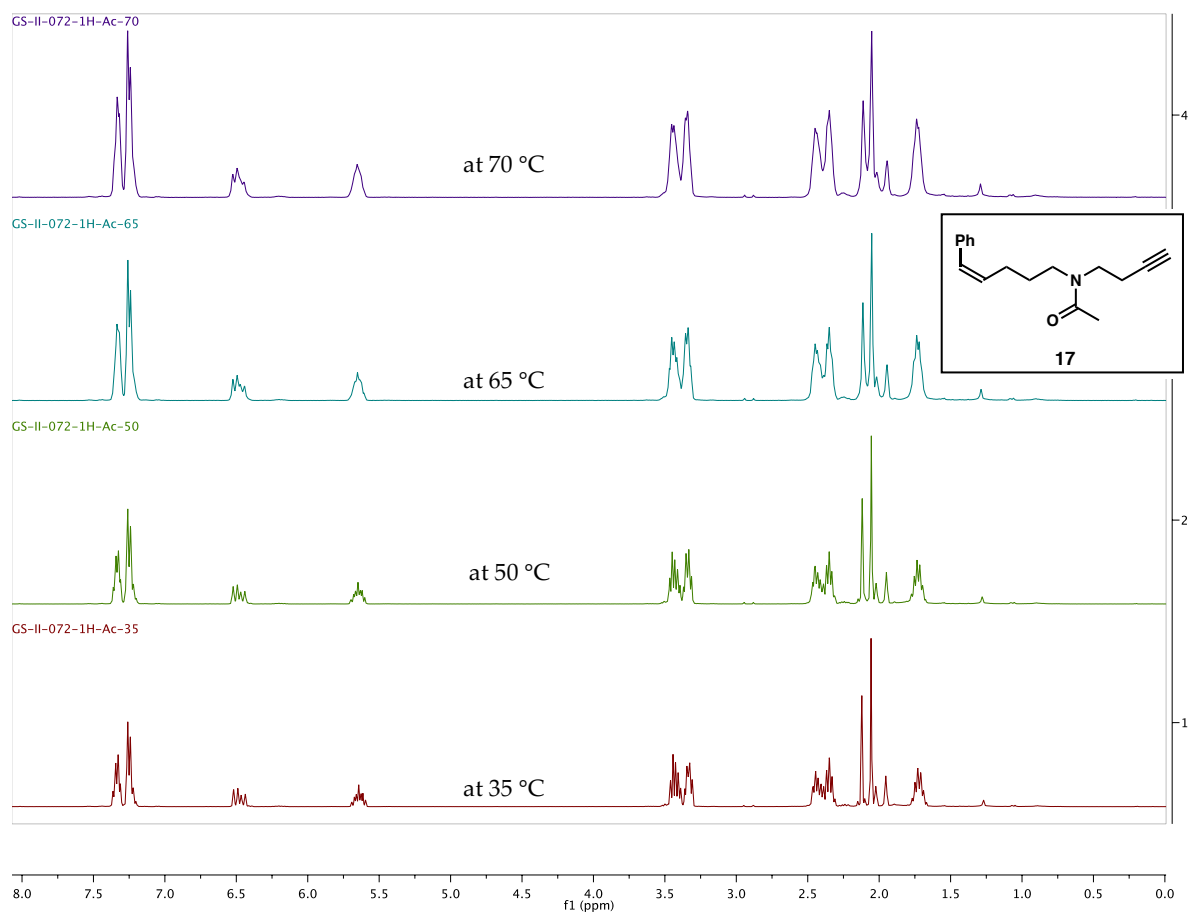Variable temperature  $^1\text{H}$ -NMR of compound 17
